# Supplementary material for: Species Diversity and Distribution Characteristics of Calonectria in Five Soil Layers in a Eucalyptus Plantation
Source: MDPI journal article supplement (doi:10.3390/jof7100857), 2021-10-13
Supplement: s1 [file s1]

Supplementary Materials:

**Table S1.** Number of sampling points containing each *Calonectria* species in each soil layer.

| Soil layer                | <i>C.<br/>hongkongen-<br/>sis</i> | <i>C. aconidi-<br/>alis</i> | <i>C. kyotensis</i> | <i>C. ilicicola</i> | <i>C. chinensis</i> | <i>C. orientalis</i> | All six <i>Calonectria</i><br>species |
|---------------------------|-----------------------------------|-----------------------------|---------------------|---------------------|---------------------|----------------------|---------------------------------------|
| 0–20 cm                   | 78                                | 44                          | 16                  | 8                   | 1                   | 0                    | 92                                    |
| 20–40 cm                  | 31                                | 10                          | 4                   | 4                   | 0                   | 0                    | 40                                    |
| 40–60 cm                  | 14                                | 3                           | 2                   | 1                   | 0                   | 1                    | 20                                    |
| 60–80 cm                  | 2                                 | 2                           | 1                   | 1                   | 0                   | 1                    | 7                                     |
| 80–100 cm                 | 4                                 | 2                           | 0                   | 0                   | 0                   | 0                    | 5                                     |
| All five soil lay-<br>ers | 82                                | 49                          | 22                  | 11                  | 1                   | 1                    | 93                                    |

**Table S2.** All 1037 isolates obtained and sequenced in this study.

| Sampling point No. <sup>1</sup> | Soil layer | Sample and isolate information <sup>2</sup> | Isolate No. <sup>3</sup> | Identity                | Genotype <sup>4</sup> | Collectors                                        | GenBank Accession No. <sup>5</sup> |             |                |             |
|---------------------------------|------------|---------------------------------------------|--------------------------|-------------------------|-----------------------|---------------------------------------------------|------------------------------------|-------------|----------------|-------------|
|                                 |            |                                             |                          |                         |                       |                                                   | <i>tef1</i>                        | <i>tub2</i> | <i>cmdA</i>    | <i>his3</i> |
| 1                               | 0–20 cm    | 20200709-1-(1)_0–20 cm_A_R1_SC1             | CSF20257                 | <i>C. aconidialis</i>   | ACAA                  | S.F. Chen, L.L. Liu, J.L. Han, Y Liu & X.Y. Liang | OK167865                           | OK168902    | OK169156       | OK169240    |
| 1                               | 0–20 cm    | 20200709-1-(1)_0–20 cm_A_R1_SC2             | CSF20258                 | <i>C. hongkongensis</i> | AAAA                  | S.F. Chen, L.L. Liu, J.L. Han, Y Liu & X.Y. Liang | OK167035                           | OK168072    | OK169109       | OK169194    |
| 1                               | 0–20 cm    | 20200709-1-(1)_0–20 cm_A_R2_SC1             | CSF20259                 | <i>C. hongkongensis</i> | AFAA                  | S.F. Chen, L.L. Liu, J.L. Han, Y Liu & X.Y. Liang | OK167610                           | OK168647    | OK169124       | OK169208    |
| 1                               | 0–20 cm    | 20200709-1-(1)_0–20 cm_A_R2_SC2             | CSF20260                 | <i>C. kyotensis</i>     | ABAB                  | S.F. Chen, L.L. Liu, J.L. Han, Y Liu & X.Y. Liang | OK167983                           | OK169020    | OK169164       | OK169248    |
| 1                               | 0–20 cm    | 20200709-1-(1)_0–20 cm_B_R1_SC1             | CSF20261                 | <i>C. kyotensis</i>     | AB--                  | S.F. Chen, L.L. Liu, J.L. Han, Y Liu & X.Y. Liang | OK167984                           | OK169021    | – <sup>6</sup> | –           |
| 1                               | 0–20 cm    | 20200709-1-(1)_0–20 cm_B_R1_SC2             | CSF20262                 | <i>C. kyotensis</i>     | AB--                  | S.F. Chen, L.L. Liu, J.L. Han, Y Liu & X.Y. Liang | OK167985                           | OK169022    | –              | –           |
| 1                               | 20–40 cm   | 20200709-1-(1)_0–40 cm_A_R1_SC1             | CSF20263                 | <i>C. hongkongensis</i> | AA--                  | S.F. Chen, L.L. Liu, J.L. Han, Y Liu & X.Y. Liang | OK167036                           | OK168073    | –              | –           |
| 1                               | 20–40 cm   | 20200709-1-(1)_0–40 cm_A_R1_SC2             | CSF20264                 | <i>C. hongkongensis</i> | AA--                  | S.F. Chen, L.L. Liu, J.L. Han, Y Liu & X.Y. Liang | OK167037                           | OK168074    | –              | –           |
| 1                               | 20–40 cm   | 20200709-1-(1)_0–40 cm_A_R1_SC3             | CSF20265                 | <i>C. hongkongensis</i> | AA--                  | S.F. Chen, L.L. Liu, J.L. Han, Y Liu & X.Y. Liang | OK167038                           | OK168075    | –              | –           |
| 1                               | 20–40 cm   | 20200709-1-(1)_0–40 cm_A_R1_SC4             | CSF20266                 | <i>C. hongkongensis</i> | AA--                  | S.F. Chen, L.L. Liu, J.L. Han, Y Liu & X.Y. Liang | OK167039                           | OK168076    | –              | –           |
| 1                               | 40–60 cm   | 20200709-1-(1)_0–60 cm_C_R1_SC1             | CSF20267                 | <i>C. hongkongensis</i> | AA--                  | S.F. Chen, L.L. Liu, J.L. Han, Y Liu & X.Y. Liang | OK167040                           | OK168077    | –              | –           |
| 1                               | 40–60 cm   | 20200709-1-(1)_0–60 cm_C_R1_SC2             | CSF20268                 | <i>C. hongkongensis</i> | AA--                  | S.F. Chen, L.L. Liu, J.L. Han, Y Liu & X.Y. Liang | OK167041                           | OK168078    | –              | –           |
| 1                               | 40–60 cm   | 20200709-1-(1)_0–60 cm_C_R1_SC3             | CSF20269                 | <i>C. hongkongensis</i> | AA--                  | S.F. Chen, L.L. Liu, J.L. Han, Y Liu & X.Y. Liang | OK167042                           | OK168079    | –              | –           |
| 1                               | 40–60 cm   | 20200709-1-(1)_0–60 cm_C_R1_SC4             | CSF20270                 | <i>C. hongkongensis</i> | AA--                  | S.F. Chen, L.L. Liu, J.L. Han, Y Liu & X.Y. Liang | OK167043                           | OK168080    | –              | –           |

|   |          |                                    |          |                         |      |                                                   |          |          |          |          |
|---|----------|------------------------------------|----------|-------------------------|------|---------------------------------------------------|----------|----------|----------|----------|
| 2 | 0–20 cm  | 20200709-1-(2)_0–20<br>cm_A_R1_SC1 | CSF20271 | <i>C. hongkongensis</i> | AAAA | S.F. Chen, L.L. Liu, J.L. Han, Y Liu & X.Y. Liang | OK167044 | OK168081 | OK169110 | OK169195 |
| 2 | 0–20 cm  | 20200709-1-(2)_0–20<br>cm_A_R1_SC2 | CSF20272 | <i>C. hongkongensis</i> | AA-- | S.F. Chen, L.L. Liu, J.L. Han, Y Liu & X.Y. Liang | OK167045 | OK168082 | –        | –        |
| 2 | 0–20 cm  | 20200709-1-(2)_0–20<br>cm_B_R2_SC1 | CSF20273 | <i>C. hongkongensis</i> | AA-- | S.F. Chen, L.L. Liu, J.L. Han, Y Liu & X.Y. Liang | OK167046 | OK168083 | –        | –        |
| 2 | 0–20 cm  | 20200709-1-(2)_0–20<br>cm_B_R2_SC2 | CSF20274 | <i>C. hongkongensis</i> | AA-- | S.F. Chen, L.L. Liu, J.L. Han, Y Liu & X.Y. Liang | OK167047 | OK168084 | –        | –        |
| 2 | 20–40 cm | 20200709-1-(2)_0–40<br>cm_A_R1_SC1 | CSF20275 | <i>C. kyotensis</i>     | BAAA | S.F. Chen, L.L. Liu, J.L. Han, Y Liu & X.Y. Liang | OK168002 | OK169039 | OK169168 | OK169252 |
| 2 | 20–40 cm | 20200709-1-(2)_0–40<br>cm_A_R1_SC2 | CSF20276 | <i>C. kyotensis</i>     | BAAA | S.F. Chen, L.L. Liu, J.L. Han, Y Liu & X.Y. Liang | OK168003 | OK169040 | OK169169 | OK169253 |
| 2 | 20–40 cm | 20200709-1-(2)_0–40<br>cm_A_R1_SC3 | CSF20277 | <i>C. kyotensis</i>     | BA-- | S.F. Chen, L.L. Liu, J.L. Han, Y Liu & X.Y. Liang | OK168004 | OK169041 | –        | –        |
| 2 | 20–40 cm | 20200709-1-(2)_0–40<br>cm_A_R1_SC4 | CSF20278 | <i>C. kyotensis</i>     | BA-- | S.F. Chen, L.L. Liu, J.L. Han, Y Liu & X.Y. Liang | OK168005 | OK169042 | –        | –        |
| 2 | 20–40 cm | 20200709-1-(2)_0–40<br>cm_B_R1_SC1 | CSF20279 | <i>C. hongkongensis</i> | AA-- | S.F. Chen, L.L. Liu, J.L. Han, Y Liu & X.Y. Liang | OK167048 | OK168085 | –        | –        |
| 2 | 20–40 cm | 20200709-1-(2)_0–40<br>cm_B_R1_SC2 | CSF20280 | <i>C. hongkongensis</i> | AA-- | S.F. Chen, L.L. Liu, J.L. Han, Y Liu & X.Y. Liang | OK167049 | OK168086 | –        | –        |
| 2 | 20–40 cm | 20200709-1-(2)_0–40<br>cm_B_R1_SC3 | CSF20281 | <i>C. hongkongensis</i> | AA-- | S.F. Chen, L.L. Liu, J.L. Han, Y Liu & X.Y. Liang | OK167050 | OK168087 | –        | –        |
| 2 | 20–40 cm | 20200709-1-(2)_0–40<br>cm_B_R1_SC4 | CSF20282 | <i>C. hongkongensis</i> | AA-- | S.F. Chen, L.L. Liu, J.L. Han, Y Liu & X.Y. Liang | OK167051 | OK168088 | –        | –        |
| 2 | 20–40 cm | 20200709-1-(2)_0–40<br>cm_B_R2_SC1 | CSF20283 | <i>C. hongkongensis</i> | AA-- | S.F. Chen, L.L. Liu, J.L. Han, Y Liu & X.Y. Liang | OK167052 | OK168089 | –        | –        |
| 2 | 20–40 cm | 20200709-1-(2)_0–40<br>cm_B_R2_SC2 | CSF20284 | <i>C. hongkongensis</i> | AA-- | S.F. Chen, L.L. Liu, J.L. Han, Y Liu & X.Y. Liang | OK167053 | OK168090 | –        | –        |
| 2 | 20–40 cm | 20200709-1-(2)_0–40<br>cm_B_R2_SC3 | CSF20285 | <i>C. hongkongensis</i> | AA-- | S.F. Chen, L.L. Liu, J.L. Han, Y Liu & X.Y. Liang | OK167054 | OK168091 | –        | –        |
| 2 | 20–40 cm | 20200709-1-(2)_0–40<br>cm_B_R2_SC4 | CSF20286 | <i>C. hongkongensis</i> | AA-- | S.F. Chen, L.L. Liu, J.L. Han, Y Liu & X.Y. Liang | OK167055 | OK168092 | –        | –        |
| 3 | 0–20 cm  | 20200709-1-(3)_0–20<br>cm_A_R2_SC1 | CSF20291 | <i>C. hongkongensis</i> | AAAA | S.F. Chen, L.L. Liu, J.L. Han, Y Liu & X.Y. Liang | OK167056 | OK168093 | OK169111 | OK169196 |

|   |           |                                      |          |                         |      |                                                      |          |          |          |          |
|---|-----------|--------------------------------------|----------|-------------------------|------|------------------------------------------------------|----------|----------|----------|----------|
| 3 | 0–20 cm   | 20200709-1-(3)_0–20<br>cm_A_R2_SC2   | CSF20292 | <i>C. hongkongensis</i> | AA-- | S.F. Chen, L.L. Liu, J.L.<br>Han, Y Liu & X.Y. Liang | OK167057 | OK168094 | –        | –        |
| 3 | 80–100 cm | 20200709-1-(3)_0–<br>100 cm_A_R1_SC1 | CSF20293 | <i>C. hongkongensis</i> | AA-- | S.F. Chen, L.L. Liu, J.L.<br>Han, Y Liu & X.Y. Liang | OK167058 | OK168095 | –        | –        |
| 3 | 80–100 cm | 20200709-1-(3)_0–<br>100 cm_A_R1_SC2 | CSF20294 | <i>C. hongkongensis</i> | AA-- | S.F. Chen, L.L. Liu, J.L.<br>Han, Y Liu & X.Y. Liang | OK167059 | OK168096 | –        | –        |
| 3 | 80–100 cm | 20200709-1-(3)_0–<br>100 cm_A_R1_SC3 | CSF20295 | <i>C. hongkongensis</i> | AA-- | S.F. Chen, L.L. Liu, J.L.<br>Han, Y Liu & X.Y. Liang | OK167060 | OK168097 | –        | –        |
| 3 | 80–100 cm | 20200709-1-(3)_0–<br>100 cm_A_R1_SC4 | CSF20296 | <i>C. hongkongensis</i> | AA-- | S.F. Chen, L.L. Liu, J.L.<br>Han, Y Liu & X.Y. Liang | OK167061 | OK168098 | –        | –        |
| 3 | 80–100 cm | 20200709-1-(3)_0–<br>100 cm_D_R1_SC1 | CSF20305 | <i>C. hongkongensis</i> | AA-- | S.F. Chen, L.L. Liu, J.L.<br>Han, Y Liu & X.Y. Liang | OK167062 | OK168099 | –        | –        |
| 3 | 80–100 cm | 20200709-1-(3)_0–<br>100 cm_D_R1_SC2 | CSF20306 | <i>C. hongkongensis</i> | AA-- | S.F. Chen, L.L. Liu, J.L.<br>Han, Y Liu & X.Y. Liang | OK167063 | OK168100 | –        | –        |
| 3 | 80–100 cm | 20200709-1-(3)_0–<br>100 cm_D_R1_SC3 | CSF20307 | <i>C. hongkongensis</i> | AA-- | S.F. Chen, L.L. Liu, J.L.<br>Han, Y Liu & X.Y. Liang | OK167064 | OK168101 | –        | –        |
| 3 | 80–100 cm | 20200709-1-(3)_0–<br>100 cm_D_R1_SC4 | CSF20308 | <i>C. hongkongensis</i> | AA-- | S.F. Chen, L.L. Liu, J.L.<br>Han, Y Liu & X.Y. Liang | OK167065 | OK168102 | –        | –        |
| 4 | 0–20 cm   | 20200711-1-(1)_0–20<br>cm_A_R1_SC1   | CSF20309 | <i>C. hongkongensis</i> | AFAA | S.F. Chen, L.L. Liu, J.L.<br>Han, Y Liu & X.Y. Liang | OK167611 | OK168648 | OK169125 | OK169209 |
| 4 | 0–20 cm   | 20200711-1-(1)_0–20<br>cm_A_R1_SC2   | CSF20310 | <i>C. hongkongensis</i> | AF-- | S.F. Chen, L.L. Liu, J.L.<br>Han, Y Liu & X.Y. Liang | OK167612 | OK168649 | –        | –        |
| 4 | 0–20 cm   | 20200711-1-(1)_0–20<br>cm_A_R2_SC1   | CSF20311 | <i>C. hongkongensis</i> | AF-- | S.F. Chen, L.L. Liu, J.L.<br>Han, Y Liu & X.Y. Liang | OK167613 | OK168650 | –        | –        |
| 4 | 0–20 cm   | 20200711-1-(1)_0–20<br>cm_A_R2_SC2   | CSF20312 | <i>C. hongkongensis</i> | AF-- | S.F. Chen, L.L. Liu, J.L.<br>Han, Y Liu & X.Y. Liang | OK167614 | OK168651 | –        | –        |
| 4 | 0–20 cm   | 20200711-1-(1)_0–20<br>cm_B_R1_SC1   | CSF20313 | <i>C. hongkongensis</i> | AA-- | S.F. Chen, L.L. Liu, J.L.<br>Han, Y Liu & X.Y. Liang | OK167066 | OK168103 | –        | –        |
| 4 | 0–20 cm   | 20200711-1-(1)_0–20<br>cm_B_R1_SC2   | CSF20314 | <i>C. hongkongensis</i> | AA-- | S.F. Chen, L.L. Liu, J.L.<br>Han, Y Liu & X.Y. Liang | OK167067 | OK168104 | –        | –        |
| 4 | 0–20 cm   | 20200711-1-(1)_0–20<br>cm_B_R2_SC1   | CSF20315 | <i>C. hongkongensis</i> | AA-- | S.F. Chen, L.L. Liu, J.L.<br>Han, Y Liu & X.Y. Liang | OK167068 | OK168105 | –        | –        |
| 4 | 0–20 cm   | 20200711-1-(1)_0–20<br>cm_B_R2_SC2   | CSF20316 | <i>C. hongkongensis</i> | AA-- | S.F. Chen, L.L. Liu, J.L.<br>Han, Y Liu & X.Y. Liang | OK167069 | OK168106 | –        | –        |

|   |          |                                    |          |                         |      |                                                      |          |          |          |          |
|---|----------|------------------------------------|----------|-------------------------|------|------------------------------------------------------|----------|----------|----------|----------|
| 5 | 0–20 cm  | 20200711-1-(2)_0–20<br>cm_A_R1_SC1 | CSF20317 | <i>C. hongkongensis</i> | AA-- | S.F. Chen, L.L. Liu, J.L.<br>Han, Y Liu & X.Y. Liang | OK167070 | OK168107 | –        | –        |
| 5 | 0–20 cm  | 20200711-1-(2)_0–20<br>cm_A_R1_SC2 | CSF20318 | <i>C. hongkongensis</i> | AA-- | S.F. Chen, L.L. Liu, J.L.<br>Han, Y Liu & X.Y. Liang | OK167071 | OK168108 | –        | –        |
| 5 | 0–20 cm  | 20200711-1-(2)_0–20<br>cm_A_R2_SC1 | CSF20319 | <i>C. hongkongensis</i> | AA-- | S.F. Chen, L.L. Liu, J.L.<br>Han, Y Liu & X.Y. Liang | OK167072 | OK168109 | –        | –        |
| 5 | 0–20 cm  | 20200711-1-(2)_0–20<br>cm_A_R2_SC2 | CSF20320 | <i>C. hongkongensis</i> | AA-- | S.F. Chen, L.L. Liu, J.L.<br>Han, Y Liu & X.Y. Liang | OK167073 | OK168110 | –        | –        |
| 5 | 0–20 cm  | 20200711-1-(2)_0–20<br>cm_B_R2_SC1 | CSF20321 | <i>C. hongkongensis</i> | AA-- | S.F. Chen, L.L. Liu, J.L.<br>Han, Y Liu & X.Y. Liang | OK167074 | OK168111 | –        | –        |
| 5 | 0–20 cm  | 20200711-1-(2)_0–20<br>cm_B_R2_SC2 | CSF20322 | <i>C. hongkongensis</i> | AA-- | S.F. Chen, L.L. Liu, J.L.<br>Han, Y Liu & X.Y. Liang | OK167075 | OK168112 | –        | –        |
| 6 | 0–20 cm  | 20200711-1-(3)_0–20<br>cm_A_R1_SC1 | CSF20323 | <i>C. aconidialis</i>   | ACAA | S.F. Chen, L.L. Liu, J.L.<br>Han, Y Liu & X.Y. Liang | OK167866 | OK168903 | OK169157 | OK169241 |
| 6 | 0–20 cm  | 20200711-1-(3)_0–20<br>cm_A_R2_SC1 | CSF20324 | <i>C. aconidialis</i>   | AC-- | S.F. Chen, L.L. Liu, J.L.<br>Han, Y Liu & X.Y. Liang | OK167867 | OK168904 | –        | –        |
| 6 | 0–20 cm  | 20200711-1-(3)_0–20<br>cm_A_R2_SC2 | CSF20325 | <i>C. aconidialis</i>   | AAAA | S.F. Chen, L.L. Liu, J.L.<br>Han, Y Liu & X.Y. Liang | OK167700 | OK168737 | OK169148 | OK169232 |
| 6 | 0–20 cm  | 20200711-1-(3)_0–20<br>cm_B_R1_SC1 | CSF20326 | <i>C. hongkongensis</i> | AA-- | S.F. Chen, L.L. Liu, J.L.<br>Han, Y Liu & X.Y. Liang | OK167076 | OK168113 | –        | –        |
| 6 | 0–20 cm  | 20200711-1-(3)_0–20<br>cm_B_R1_SC2 | CSF20327 | <i>C. hongkongensis</i> | AA-- | S.F. Chen, L.L. Liu, J.L.<br>Han, Y Liu & X.Y. Liang | OK167077 | OK168114 | –        | –        |
| 6 | 0–20 cm  | 20200711-1-(3)_0–20<br>cm_B_R2_SC1 | CSF20328 | <i>C. hongkongensis</i> | AA-- | S.F. Chen, L.L. Liu, J.L.<br>Han, Y Liu & X.Y. Liang | OK167078 | OK168115 | –        | –        |
| 6 | 0–20 cm  | 20200711-1-(3)_0–20<br>cm_B_R2_SC2 | CSF20329 | <i>C. hongkongensis</i> | AA-- | S.F. Chen, L.L. Liu, J.L.<br>Han, Y Liu & X.Y. Liang | OK167079 | OK168116 | –        | –        |
| 6 | 20–40 cm | 20200711-1-(3)_0–40<br>cm_A_R2_SC1 | CSF20330 | <i>C. hongkongensis</i> | AA-- | S.F. Chen, L.L. Liu, J.L.<br>Han, Y Liu & X.Y. Liang | OK167080 | OK168117 | –        | –        |
| 6 | 20–40 cm | 20200711-1-(3)_0–40<br>cm_A_R2_SC2 | CSF20331 | <i>C. hongkongensis</i> | AA-- | S.F. Chen, L.L. Liu, J.L.<br>Han, Y Liu & X.Y. Liang | OK167081 | OK168118 | –        | –        |
| 6 | 20–40 cm | 20200711-1-(3)_0–40<br>cm_A_R2_SC3 | CSF20332 | <i>C. hongkongensis</i> | AA-- | S.F. Chen, L.L. Liu, J.L.<br>Han, Y Liu & X.Y. Liang | OK167082 | OK168119 | –        | –        |
| 6 | 20–40 cm | 20200711-1-(3)_0–40<br>cm_A_R2_SC4 | CSF20333 | <i>C. hongkongensis</i> | AA-- | S.F. Chen, L.L. Liu, J.L.<br>Han, Y Liu & X.Y. Liang | OK167083 | OK168120 | –        | –        |

|   |          |                                    |          |                         |      |                                                   |          |          |          |          |
|---|----------|------------------------------------|----------|-------------------------|------|---------------------------------------------------|----------|----------|----------|----------|
| 6 | 20–40 cm | 20200711-1-(3)_0–40<br>cm_B_R1_SC1 | CSF20334 | <i>C. hongkongensis</i> | DAAA | S.F. Chen, L.L. Liu, J.L. Han, Y Liu & X.Y. Liang | OK167669 | OK168706 | OK169144 | OK169228 |
| 6 | 20–40 cm | 20200711-1-(3)_0–40<br>cm_B_R1_SC2 | CSF20335 | <i>C. hongkongensis</i> | DA-- | S.F. Chen, L.L. Liu, J.L. Han, Y Liu & X.Y. Liang | OK167670 | OK168707 | –        | –        |
| 6 | 20–40 cm | 20200711-1-(3)_0–40<br>cm_B_R1_SC3 | CSF20336 | <i>C. hongkongensis</i> | DA-- | S.F. Chen, L.L. Liu, J.L. Han, Y Liu & X.Y. Liang | OK167671 | OK168708 | –        | –        |
| 6 | 20–40 cm | 20200711-1-(3)_0–40<br>cm_B_R1_SC4 | CSF20337 | <i>C. hongkongensis</i> | DA-- | S.F. Chen, L.L. Liu, J.L. Han, Y Liu & X.Y. Liang | OK167672 | OK168709 | –        | –        |
| 6 | 20–40 cm | 20200711-1-(3)_0–40<br>cm_B_R2_SC1 | CSF20338 | <i>C. kyotensis</i>     | ABBA | S.F. Chen, L.L. Liu, J.L. Han, Y Liu & X.Y. Liang | OK167986 | OK169023 | OK169165 | OK169249 |
| 6 | 20–40 cm | 20200711-1-(3)_0–40<br>cm_B_R2_SC2 | CSF20339 | <i>C. hongkongensis</i> | AA-- | S.F. Chen, L.L. Liu, J.L. Han, Y Liu & X.Y. Liang | OK167084 | OK168121 | –        | –        |
| 6 | 20–40 cm | 20200711-1-(3)_0–40<br>cm_B_R2_SC3 | CSF20340 | <i>C. hongkongensis</i> | AA-- | S.F. Chen, L.L. Liu, J.L. Han, Y Liu & X.Y. Liang | OK167085 | OK168122 | –        | –        |
| 6 | 20–40 cm | 20200711-1-(3)_0–40<br>cm_B_R2_SC4 | CSF20341 | <i>C. kyotensis</i>     | AB-- | S.F. Chen, L.L. Liu, J.L. Han, Y Liu & X.Y. Liang | OK167987 | OK169024 | –        | –        |
| 6 | 60–80 cm | 20200711-1-(3)_0–80<br>cm_A_R1_SC1 | CSF20342 | <i>C. hongkongensis</i> | AA-- | S.F. Chen, L.L. Liu, J.L. Han, Y Liu & X.Y. Liang | OK167086 | OK168123 | –        | –        |
| 6 | 60–80 cm | 20200711-1-(3)_0–80<br>cm_A_R1_SC2 | CSF20343 | <i>C. hongkongensis</i> | AA-- | S.F. Chen, L.L. Liu, J.L. Han, Y Liu & X.Y. Liang | OK167087 | OK168124 | –        | –        |
| 6 | 60–80 cm | 20200711-1-(3)_0–80<br>cm_A_R1_SC3 | CSF20344 | <i>C. hongkongensis</i> | AA-- | S.F. Chen, L.L. Liu, J.L. Han, Y Liu & X.Y. Liang | OK167088 | OK168125 | –        | –        |
| 6 | 60–80 cm | 20200711-1-(3)_0–80<br>cm_A_R1_SC4 | CSF20345 | <i>C. hongkongensis</i> | AA-- | S.F. Chen, L.L. Liu, J.L. Han, Y Liu & X.Y. Liang | OK167089 | OK168126 | –        | –        |
| 7 | 0–20 cm  | 20200711-1-(4)_0–20<br>cm_A_R1_SC1 | CSF20350 | <i>C. hongkongensis</i> | AA-- | S.F. Chen, L.L. Liu, J.L. Han, Y Liu & X.Y. Liang | OK167090 | OK168127 | –        | –        |
| 7 | 0–20 cm  | 20200711-1-(4)_0–20<br>cm_A_R1_SC2 | CSF20351 | <i>C. hongkongensis</i> | AA-- | S.F. Chen, L.L. Liu, J.L. Han, Y Liu & X.Y. Liang | OK167091 | OK168128 | –        | –        |
| 7 | 0–20 cm  | 20200711-1-(4)_0–20<br>cm_A_R2_SC1 | CSF20352 | <i>C. hongkongensis</i> | AA-- | S.F. Chen, L.L. Liu, J.L. Han, Y Liu & X.Y. Liang | OK167092 | OK168129 | –        | –        |
| 7 | 0–20 cm  | 20200711-1-(4)_0–20<br>cm_A_R2_SC2 | CSF20353 | <i>C. hongkongensis</i> | CAAA | S.F. Chen, L.L. Liu, J.L. Han, Y Liu & X.Y. Liang | OK167664 | OK168701 | OK169140 | OK169224 |
| 7 | 0–20 cm  | 20200711-1-(4)_0–20<br>cm_B_R1_SC1 | CSF20354 | <i>C. hongkongensis</i> | AA-- | S.F. Chen, L.L. Liu, J.L. Han, Y Liu & X.Y. Liang | OK167093 | OK168130 | –        | –        |

|   |          |                                    |          |                         |      |                                                      |          |          |          |          |
|---|----------|------------------------------------|----------|-------------------------|------|------------------------------------------------------|----------|----------|----------|----------|
| 7 | 0–20 cm  | 20200711-1-(4)_0–20<br>cm_B_R1_SC2 | CSF20355 | <i>C. hongkongensis</i> | AA-- | S.F. Chen, L.L. Liu, J.L.<br>Han, Y Liu & X.Y. Liang | OK167094 | OK168131 | –        | –        |
| 7 | 0–20 cm  | 20200711-1-(4)_0–20<br>cm_B_R2_SC1 | CSF20356 | <i>C. hongkongensis</i> | AA-- | S.F. Chen, L.L. Liu, J.L.<br>Han, Y Liu & X.Y. Liang | OK167095 | OK168132 | –        | –        |
| 7 | 0–20 cm  | 20200711-1-(4)_0–20<br>cm_B_R2_SC2 | CSF20357 | <i>C. hongkongensis</i> | AA-- | S.F. Chen, L.L. Liu, J.L.<br>Han, Y Liu & X.Y. Liang | OK167096 | OK168133 | –        | –        |
| 7 | 20–40 cm | 20200711-1-(4)_0–40<br>cm_B_R1_SC1 | CSF20358 | <i>C. hongkongensis</i> | CAAA | S.F. Chen, L.L. Liu, J.L.<br>Han, Y Liu & X.Y. Liang | OK167665 | OK168702 | OK169141 | OK169225 |
| 7 | 20–40 cm | 20200711-1-(4)_0–40<br>cm_B_R1_SC2 | CSF20359 | <i>C. hongkongensis</i> | CAAA | S.F. Chen, L.L. Liu, J.L.<br>Han, Y Liu & X.Y. Liang | OK167666 | OK168703 | OK169142 | OK169226 |
| 7 | 20–40 cm | 20200711-1-(4)_0–40<br>cm_B_R1_SC3 | CSF20360 | <i>C. hongkongensis</i> | CAAA | S.F. Chen, L.L. Liu, J.L.<br>Han, Y Liu & X.Y. Liang | OK167667 | OK168704 | OK169143 | OK169227 |
| 7 | 20–40 cm | 20200711-1-(4)_0–40<br>cm_B_R1_SC4 | CSF20361 | <i>C. hongkongensis</i> | CA-- | S.F. Chen, L.L. Liu, J.L.<br>Han, Y Liu & X.Y. Liang | OK167668 | OK168705 | –        | –        |
| 7 | 40–60 cm | 20200711-1-(4)_0–60<br>cm_B_R1_SC1 | CSF20362 | <i>C. hongkongensis</i> | AA-- | S.F. Chen, L.L. Liu, J.L.<br>Han, Y Liu & X.Y. Liang | OK167097 | OK168134 | –        | –        |
| 7 | 40–60 cm | 20200711-1-(4)_0–60<br>cm_B_R1_SC2 | CSF20363 | <i>C. hongkongensis</i> | AA-- | S.F. Chen, L.L. Liu, J.L.<br>Han, Y Liu & X.Y. Liang | OK167098 | OK168135 | –        | –        |
| 7 | 40–60 cm | 20200711-1-(4)_0–60<br>cm_B_R1_SC3 | CSF20364 | <i>C. hongkongensis</i> | AA-- | S.F. Chen, L.L. Liu, J.L.<br>Han, Y Liu & X.Y. Liang | OK167099 | OK168136 | –        | –        |
| 7 | 40–60 cm | 20200711-1-(4)_0–60<br>cm_B_R1_SC4 | CSF20365 | <i>C. hongkongensis</i> | AA-- | S.F. Chen, L.L. Liu, J.L.<br>Han, Y Liu & X.Y. Liang | OK167100 | OK168137 | –        | –        |
| 8 | 0–20 cm  | 20200711-1-(5)_0–20<br>cm_A_R1_SC1 | CSF20366 | <i>C. hongkongensis</i> | AA-- | S.F. Chen, L.L. Liu, J.L.<br>Han, Y Liu & X.Y. Liang | OK167101 | OK168138 | –        | –        |
| 8 | 0–20 cm  | 20200711-1-(5)_0–20<br>cm_A_R1_SC2 | CSF20367 | <i>C. hongkongensis</i> | AA-- | S.F. Chen, L.L. Liu, J.L.<br>Han, Y Liu & X.Y. Liang | OK167102 | OK168139 | –        | –        |
| 8 | 0–20 cm  | 20200711-1-(5)_0–20<br>cm_A_R2_SC1 | CSF20368 | <i>C. hongkongensis</i> | AA-- | S.F. Chen, L.L. Liu, J.L.<br>Han, Y Liu & X.Y. Liang | OK167103 | OK168140 | –        | –        |
| 8 | 0–20 cm  | 20200711-1-(5)_0–20<br>cm_A_R2_SC2 | CSF20369 | <i>C. hongkongensis</i> | AA-- | S.F. Chen, L.L. Liu, J.L.<br>Han, Y Liu & X.Y. Liang | OK167104 | OK168141 | –        | –        |
| 8 | 0–20 cm  | 20200711-1-(5)_0–20<br>cm_B_R1_SC1 | CSF20370 | <i>C. hongkongensis</i> | AA-- | S.F. Chen, L.L. Liu, J.L.<br>Han, Y Liu & X.Y. Liang | OK167105 | OK168142 | –        | –        |
| 8 | 0–20 cm  | 20200711-1-(5)_0–20<br>cm_B_R1_SC2 | CSF20371 | <i>C. hongkongensis</i> | AA-- | S.F. Chen, L.L. Liu, J.L.<br>Han, Y Liu & X.Y. Liang | OK167106 | OK168143 | –        | –        |

|   |          |                                    |          |                         |      |                                                   |          |          |          |          |
|---|----------|------------------------------------|----------|-------------------------|------|---------------------------------------------------|----------|----------|----------|----------|
| 8 | 0–20 cm  | 20200711-1-(5)_0–20<br>cm_B_R2_SC1 | CSF20372 | <i>C. kyotensis</i>     | AAAA | S.F. Chen, L.L. Liu, J.L. Han, Y Liu & X.Y. Liang | OK167950 | OK168987 | OK169160 | OK169244 |
| 8 | 0–20 cm  | 20200711-1-(5)_0–20<br>cm_B_R2_SC2 | CSF20373 | <i>C. kyotensis</i>     | AA-- | S.F. Chen, L.L. Liu, J.L. Han, Y Liu & X.Y. Liang | OK167951 | OK168988 | –        | –        |
| 8 | 0–20 cm  | 20200711-1-(5)_0–20<br>cm_B_R2_SC3 | CSF20374 | <i>C. hongkongensis</i> | AA-- | S.F. Chen, L.L. Liu, J.L. Han, Y Liu & X.Y. Liang | OK167107 | OK168144 | –        | –        |
| 8 | 0–20 cm  | 20200711-1-(5)_0–20<br>cm_B_R2_SC4 | CSF20375 | <i>C. hongkongensis</i> | AA-- | S.F. Chen, L.L. Liu, J.L. Han, Y Liu & X.Y. Liang | OK167108 | OK168145 | –        | –        |
| 9 | 0–20 cm  | 20200711-1-(6)_0–20<br>cm_A_R1_SC1 | CSF20376 | <i>C. aconidialis</i>   | ACAA | S.F. Chen, L.L. Liu, J.L. Han, Y Liu & X.Y. Liang | OK167868 | OK168905 | OK169158 | OK169242 |
| 9 | 0–20 cm  | 20200711-1-(6)_0–20<br>cm_A_R1_SC2 | CSF20377 | <i>C. aconidialis</i>   | AC-- | S.F. Chen, L.L. Liu, J.L. Han, Y Liu & X.Y. Liang | OK167869 | OK168906 | –        | –        |
| 9 | 0–20 cm  | 20200711-1-(6)_0–20<br>cm_A_R2_SC1 | CSF20378 | <i>C. aconidialis</i>   | AACA | S.F. Chen, L.L. Liu, J.L. Han, Y Liu & X.Y. Liang | OK167701 | OK168738 | OK169149 | OK169233 |
| 9 | 0–20 cm  | 20200711-1-(6)_0–20<br>cm_A_R2_SC2 | CSF20379 | <i>C. aconidialis</i>   | AC-- | S.F. Chen, L.L. Liu, J.L. Han, Y Liu & X.Y. Liang | OK167870 | OK168907 | –        | –        |
| 9 | 0–20 cm  | 20200711-1-(6)_0–20<br>cm_B_R1_SC1 | CSF20380 | <i>C. hongkongensis</i> | AGAA | S.F. Chen, L.L. Liu, J.L. Han, Y Liu & X.Y. Liang | OK167630 | OK168667 | OK169128 | OK169212 |
| 9 | 0–20 cm  | 20200711-1-(6)_0–20<br>cm_B_R1_SC2 | CSF20381 | <i>C. aconidialis</i>   | AC-- | S.F. Chen, L.L. Liu, J.L. Han, Y Liu & X.Y. Liang | OK167871 | OK168908 | –        | –        |
| 9 | 0–20 cm  | 20200711-1-(6)_0–20<br>cm_B_R2_SC1 | CSF20382 | <i>C. hongkongensis</i> | AA-- | S.F. Chen, L.L. Liu, J.L. Han, Y Liu & X.Y. Liang | OK167109 | OK168146 | –        | –        |
| 9 | 0–20 cm  | 20200711-1-(6)_0–20<br>cm_B_R2_SC2 | CSF20383 | <i>C. hongkongensis</i> | DAAA | S.F. Chen, L.L. Liu, J.L. Han, Y Liu & X.Y. Liang | OK167673 | OK168710 | OK169145 | OK169229 |
| 9 | 20–40 cm | 20200711-1-(6)_0–40<br>cm_A_R2_SC1 | CSF20384 | <i>C. aconidialis</i>   | AC-- | S.F. Chen, L.L. Liu, J.L. Han, Y Liu & X.Y. Liang | OK167872 | OK168909 | –        | –        |
| 9 | 20–40 cm | 20200711-1-(6)_0–40<br>cm_A_R2_SC2 | CSF20385 | <i>C. aconidialis</i>   | AC-- | S.F. Chen, L.L. Liu, J.L. Han, Y Liu & X.Y. Liang | OK167873 | OK168910 | –        | –        |
| 9 | 20–40 cm | 20200711-1-(6)_0–40<br>cm_A_R2_SC3 | CSF20386 | <i>C. aconidialis</i>   | AC-- | S.F. Chen, L.L. Liu, J.L. Han, Y Liu & X.Y. Liang | OK167874 | OK168911 | –        | –        |
| 9 | 20–40 cm | 20200711-1-(6)_0–40<br>cm_A_R2_SC4 | CSF20387 | <i>C. aconidialis</i>   | AC-- | S.F. Chen, L.L. Liu, J.L. Han, Y Liu & X.Y. Liang | OK167875 | OK168912 | –        | –        |
| 9 | 40–60 cm | 20200711-1-(6)_0–60<br>cm_B_R1_SC1 | CSF20388 | <i>C. aconidialis</i>   | AC-- | S.F. Chen, L.L. Liu, J.L. Han, Y Liu & X.Y. Liang | OK167876 | OK168913 | –        | –        |



|    |           |                                      |          |                         |      |                                                      |          |          |          |          |
|----|-----------|--------------------------------------|----------|-------------------------|------|------------------------------------------------------|----------|----------|----------|----------|
| 9  | 40–60 cm  | 20200711-1-(6)_0–60<br>cm_B_R1_SC2   | CSF20389 | <i>C. aconidialis</i>   | AA-- | S.F. Chen, L.L. Liu, J.L.<br>Han, Y Liu & X.Y. Liang | OK167702 | OK168739 | –        | –        |
| 9  | 40–60 cm  | 20200711-1-(6)_0–60<br>cm_B_R1_SC3   | CSF20390 | <i>C. aconidialis</i>   | AC-- | S.F. Chen, L.L. Liu, J.L.<br>Han, Y Liu & X.Y. Liang | OK167877 | OK168914 | –        | –        |
| 9  | 40–60 cm  | 20200711-1-(6)_0–60<br>cm_B_R1_SC4   | CSF20391 | <i>C. aconidialis</i>   | AA-- | S.F. Chen, L.L. Liu, J.L.<br>Han, Y Liu & X.Y. Liang | OK167703 | OK168740 | –        | –        |
| 9  | 80–100 cm | 20200711-1-(6)_0–<br>100 cm_B_R1_SC1 | CSF20396 | <i>C. aconidialis</i>   | AC-- | S.F. Chen, L.L. Liu, J.L.<br>Han, Y Liu & X.Y. Liang | OK167878 | OK168915 | –        | –        |
| 9  | 80–100 cm | 20200711-1-(6)_0–<br>100 cm_B_R1_SC2 | CSF20397 | <i>C. aconidialis</i>   | AC-- | S.F. Chen, L.L. Liu, J.L.<br>Han, Y Liu & X.Y. Liang | OK167879 | OK168916 | –        | –        |
| 9  | 80–100 cm | 20200711-1-(6)_0–<br>100 cm_B_R1_SC3 | CSF20398 | <i>C. aconidialis</i>   | AC-- | S.F. Chen, L.L. Liu, J.L.<br>Han, Y Liu & X.Y. Liang | OK167880 | OK168917 | –        | –        |
| 9  | 80–100 cm | 20200711-1-(6)_0–<br>100 cm_B_R1_SC4 | CSF20399 | <i>C. aconidialis</i>   | AC-- | S.F. Chen, L.L. Liu, J.L.<br>Han, Y Liu & X.Y. Liang | OK167881 | OK168918 | –        | –        |
| 9  | 80–100 cm | 20200711-1-(6)_0–<br>100 cm_B_R2_SC1 | CSF20400 | <i>C. hongkongensis</i> | DA-- | S.F. Chen, L.L. Liu, J.L.<br>Han, Y Liu & X.Y. Liang | OK167674 | OK168711 | –        | –        |
| 9  | 80–100 cm | 20200711-1-(6)_0–<br>100 cm_B_R2_SC2 | CSF20401 | <i>C. hongkongensis</i> | DA-- | S.F. Chen, L.L. Liu, J.L.<br>Han, Y Liu & X.Y. Liang | OK167675 | OK168712 | –        | –        |
| 9  | 80–100 cm | 20200711-1-(6)_0–<br>100 cm_B_R2_SC3 | CSF20402 | <i>C. hongkongensis</i> | DA-- | S.F. Chen, L.L. Liu, J.L.<br>Han, Y Liu & X.Y. Liang | OK167676 | OK168713 | –        | –        |
| 9  | 80–100 cm | 20200711-1-(6)_0–<br>100 cm_B_R2_SC4 | CSF20403 | <i>C. hongkongensis</i> | DA-- | S.F. Chen, L.L. Liu, J.L.<br>Han, Y Liu & X.Y. Liang | OK167677 | OK168714 | –        | –        |
| 10 | 0–20 cm   | 20200711-1-(7)_0–20<br>cm_A_R1_SC1   | CSF20408 | <i>C. hongkongensis</i> | AA-- | S.F. Chen, L.L. Liu, J.L.<br>Han, Y Liu & X.Y. Liang | OK167110 | OK168147 | –        | –        |
| 10 | 0–20 cm   | 20200711-1-(7)_0–20<br>cm_A_R1_SC2   | CSF20409 | <i>C. hongkongensis</i> | AA-- | S.F. Chen, L.L. Liu, J.L.<br>Han, Y Liu & X.Y. Liang | OK167111 | OK168148 | –        | –        |
| 10 | 0–20 cm   | 20200711-1-(7)_0–20<br>cm_A_R2_SC1   | CSF20410 | <i>C. hongkongensis</i> | AA-- | S.F. Chen, L.L. Liu, J.L.<br>Han, Y Liu & X.Y. Liang | OK167112 | OK168149 | –        | –        |
| 10 | 0–20 cm   | 20200711-1-(7)_0–20<br>cm_A_R2_SC2   | CSF20411 | <i>C. hongkongensis</i> | AA-- | S.F. Chen, L.L. Liu, J.L.<br>Han, Y Liu & X.Y. Liang | OK167113 | OK168150 | –        | –        |
| 10 | 0–20 cm   | 20200711-1-(7)_0–20<br>cm_B_R1_SC1   | CSF20412 | <i>C. hongkongensis</i> | ADAA | S.F. Chen, L.L. Liu, J.L.<br>Han, Y Liu & X.Y. Liang | OK167601 | OK168638 | OK169118 | OK169202 |
| 10 | 0–20 cm   | 20200711-1-(7)_0–20<br>cm_B_R1_SC2   | CSF20413 | <i>C. hongkongensis</i> | AA-- | S.F. Chen, L.L. Liu, J.L.<br>Han, Y Liu & X.Y. Liang | OK167114 | OK168151 | –        | –        |

|    |          |                                    |          |                         |      |                                                      |          |          |   |   |
|----|----------|------------------------------------|----------|-------------------------|------|------------------------------------------------------|----------|----------|---|---|
| 10 | 0–20 cm  | 20200711-1-(7)_0–20<br>cm_B_R2_SC1 | CSF20414 | <i>C. hongkongensis</i> | AA-- | S.F. Chen, L.L. Liu, J.L.<br>Han, Y Liu & X.Y. Liang | OK167115 | OK168152 | – | – |
| 10 | 0–20 cm  | 20200711-1-(7)_0–20<br>cm_B_R2_SC2 | CSF20415 | <i>C. hongkongensis</i> | AA-- | S.F. Chen, L.L. Liu, J.L.<br>Han, Y Liu & X.Y. Liang | OK167116 | OK168153 | – | – |
| 10 | 20–40 cm | 20200711-1-(7)_0–40<br>cm_A_R2_SC1 | CSF20416 | <i>C. hongkongensis</i> | AA-- | S.F. Chen, L.L. Liu, J.L.<br>Han, Y Liu & X.Y. Liang | OK167117 | OK168154 | – | – |
| 10 | 20–40 cm | 20200711-1-(7)_0–40<br>cm_A_R2_SC2 | CSF20417 | <i>C. hongkongensis</i> | AA-- | S.F. Chen, L.L. Liu, J.L.<br>Han, Y Liu & X.Y. Liang | OK167118 | OK168155 | – | – |
| 10 | 20–40 cm | 20200711-1-(7)_0–40<br>cm_A_R2_SC3 | CSF20418 | <i>C. hongkongensis</i> | AA-- | S.F. Chen, L.L. Liu, J.L.<br>Han, Y Liu & X.Y. Liang | OK167119 | OK168156 | – | – |
| 10 | 20–40 cm | 20200711-1-(7)_0–40<br>cm_A_R2_SC4 | CSF20419 | <i>C. hongkongensis</i> | AA-- | S.F. Chen, L.L. Liu, J.L.<br>Han, Y Liu & X.Y. Liang | OK167120 | OK168157 | – | – |
| 10 | 20–40 cm | 20200711-1-(7)_0–40<br>cm_B_R1_SC1 | CSF20420 | <i>C. hongkongensis</i> | AA-- | S.F. Chen, L.L. Liu, J.L.<br>Han, Y Liu & X.Y. Liang | OK167121 | OK168158 | – | – |
| 10 | 20–40 cm | 20200711-1-(7)_0–40<br>cm_B_R1_SC2 | CSF20421 | <i>C. hongkongensis</i> | AA-- | S.F. Chen, L.L. Liu, J.L.<br>Han, Y Liu & X.Y. Liang | OK167122 | OK168159 | – | – |
| 10 | 20–40 cm | 20200711-1-(7)_0–40<br>cm_B_R1_SC3 | CSF20422 | <i>C. hongkongensis</i> | AA-- | S.F. Chen, L.L. Liu, J.L.<br>Han, Y Liu & X.Y. Liang | OK167123 | OK168160 | – | – |
| 10 | 20–40 cm | 20200711-1-(7)_0–40<br>cm_B_R1_SC4 | CSF20423 | <i>C. hongkongensis</i> | AA-- | S.F. Chen, L.L. Liu, J.L.<br>Han, Y Liu & X.Y. Liang | OK167124 | OK168161 | – | – |
| 10 | 20–40 cm | 20200711-1-(7)_0–40<br>cm_B_R2_SC1 | CSF20424 | <i>C. hongkongensis</i> | AA-- | S.F. Chen, L.L. Liu, J.L.<br>Han, Y Liu & X.Y. Liang | OK167125 | OK168162 | – | – |
| 10 | 20–40 cm | 20200711-1-(7)_0–40<br>cm_B_R2_SC2 | CSF20425 | <i>C. hongkongensis</i> | AA-- | S.F. Chen, L.L. Liu, J.L.<br>Han, Y Liu & X.Y. Liang | OK167126 | OK168163 | – | – |
| 10 | 20–40 cm | 20200711-1-(7)_0–40<br>cm_B_R2_SC3 | CSF20426 | <i>C. hongkongensis</i> | AA-- | S.F. Chen, L.L. Liu, J.L.<br>Han, Y Liu & X.Y. Liang | OK167127 | OK168164 | – | – |
| 10 | 20–40 cm | 20200711-1-(7)_0–40<br>cm_B_R2_SC4 | CSF20427 | <i>C. hongkongensis</i> | AA-- | S.F. Chen, L.L. Liu, J.L.<br>Han, Y Liu & X.Y. Liang | OK167128 | OK168165 | – | – |
| 10 | 40–60 cm | 20200711-1-(7)_0–60<br>cm_B_R1_SC1 | CSF20428 | <i>C. hongkongensis</i> | AA-- | S.F. Chen, L.L. Liu, J.L.<br>Han, Y Liu & X.Y. Liang | OK167129 | OK168166 | – | – |
| 10 | 40–60 cm | 20200711-1-(7)_0–60<br>cm_B_R1_SC2 | CSF20429 | <i>C. hongkongensis</i> | AA-- | S.F. Chen, L.L. Liu, J.L.<br>Han, Y Liu & X.Y. Liang | OK167130 | OK168167 | – | – |
| 10 | 40–60 cm | 20200711-1-(7)_0–60<br>cm_B_R1_SC3 | CSF20430 | <i>C. hongkongensis</i> | AA-- | S.F. Chen, L.L. Liu, J.L.<br>Han, Y Liu & X.Y. Liang | OK167131 | OK168168 | – | – |

|    |           |                                      |          |                         |      |                                                      |          |          |          |          |
|----|-----------|--------------------------------------|----------|-------------------------|------|------------------------------------------------------|----------|----------|----------|----------|
| 10 | 40–60 cm  | 20200711-1-(7)_0–60<br>cm_B_R1_SC4   | CSF20431 | <i>C. hongkongensis</i> | AA-- | S.F. Chen, L.L. Liu, J.L.<br>Han, Y Liu & X.Y. Liang | OK167132 | OK168169 | –        | –        |
| 10 | 40–60 cm  | 20200711-1-(7)_0–60<br>cm_B_R2_SC1   | CSF20432 | <i>C. kyotensis</i>     | ABAB | S.F. Chen, L.L. Liu, J.L.<br>Han, Y Liu & X.Y. Liang | OK167988 | OK169025 | OK169166 | OK169250 |
| 10 | 40–60 cm  | 20200711-1-(7)_0–60<br>cm_B_R2_SC2   | CSF20433 | <i>C. kyotensis</i>     | AB-- | S.F. Chen, L.L. Liu, J.L.<br>Han, Y Liu & X.Y. Liang | OK167989 | OK169026 | –        | –        |
| 10 | 40–60 cm  | 20200711-1-(7)_0–60<br>cm_B_R2_SC3   | CSF20434 | <i>C. kyotensis</i>     | AB-- | S.F. Chen, L.L. Liu, J.L.<br>Han, Y Liu & X.Y. Liang | OK167990 | OK169027 | –        | –        |
| 10 | 80–100 cm | 20200711-1-(7)_0–<br>100 cm_A_R1_SC1 | CSF20436 | <i>C. hongkongensis</i> | AA-- | S.F. Chen, L.L. Liu, J.L.<br>Han, Y Liu & X.Y. Liang | OK167133 | OK168170 | –        | –        |
| 10 | 80–100 cm | 20200711-1-(7)_0–<br>100 cm_A_R1_SC2 | CSF20437 | <i>C. hongkongensis</i> | AA-- | S.F. Chen, L.L. Liu, J.L.<br>Han, Y Liu & X.Y. Liang | OK167134 | OK168171 | –        | –        |
| 10 | 80–100 cm | 20200711-1-(7)_0–<br>100 cm_A_R1_SC3 | CSF20438 | <i>C. hongkongensis</i> | AA-- | S.F. Chen, L.L. Liu, J.L.<br>Han, Y Liu & X.Y. Liang | OK167135 | OK168172 | –        | –        |
| 10 | 80–100 cm | 20200711-1-(7)_0–<br>100 cm_A_R1_SC4 | CSF20439 | <i>C. hongkongensis</i> | AA-- | S.F. Chen, L.L. Liu, J.L.<br>Han, Y Liu & X.Y. Liang | OK167136 | OK168173 | –        | –        |
| 11 | 0–20 cm   | 20200715-1-(1)_0–20<br>cm_A_R1_SC1   | CSF20440 | <i>C. hongkongensis</i> | AA-- | S.F. Chen, L.L. Liu, J.L.<br>Han, L.S. Sun & W.W. Li | OK167137 | OK168174 | –        | –        |
| 11 | 0–20 cm   | 20200715-1-(1)_0–20<br>cm_A_R1_SC2   | CSF20441 | <i>C. hongkongensis</i> | AGAA | S.F. Chen, L.L. Liu, J.L.<br>Han, L.S. Sun & W.W. Li | OK167631 | OK168668 | OK169129 | OK169213 |
| 11 | 0–20 cm   | 20200715-1-(1)_0–20<br>cm_A_R2_SC1   | CSF20442 | <i>C. hongkongensis</i> | AA-- | S.F. Chen, L.L. Liu, J.L.<br>Han, L.S. Sun & W.W. Li | OK167138 | OK168175 | –        | –        |
| 11 | 0–20 cm   | 20200715-1-(1)_0–20<br>cm_A_R2_SC2   | CSF20443 | <i>C. kyotensis</i>     | AAAA | S.F. Chen, L.L. Liu, J.L.<br>Han, L.S. Sun & W.W. Li | OK167952 | OK168989 | OK169161 | OK169245 |
| 11 | 0–20 cm   | 20200715-1-(1)_0–20<br>cm_B_R1_SC1   | CSF20444 | <i>C. hongkongensis</i> | DAAA | S.F. Chen, L.L. Liu, J.L.<br>Han, L.S. Sun & W.W. Li | OK167678 | OK168715 | OK169146 | OK169230 |
| 11 | 0–20 cm   | 20200715-1-(1)_0–20<br>cm_B_R1_SC2   | CSF20445 | <i>C. hongkongensis</i> | AA-- | S.F. Chen, L.L. Liu, J.L.<br>Han, L.S. Sun & W.W. Li | OK167139 | OK168176 | –        | –        |
| 11 | 0–20 cm   | 20200715-1-(1)_0–20<br>cm_B_R2_SC1   | CSF20446 | <i>C. hongkongensis</i> | AA-- | S.F. Chen, L.L. Liu, J.L.<br>Han, L.S. Sun & W.W. Li | OK167140 | OK168177 | –        | –        |
| 11 | 0–20 cm   | 20200715-1-(1)_0–20<br>cm_B_R2_SC2   | CSF20447 | <i>C. aconidialis</i>   | AACA | S.F. Chen, L.L. Liu, J.L.<br>Han, L.S. Sun & W.W. Li | OK167704 | OK168741 | OK169150 | OK169234 |
| 11 | 20–40 cm  | 20200715-1-(1)_0–40<br>cm_A_R1_SC1   | CSF20448 | <i>C. hongkongensis</i> | AA-- | S.F. Chen, L.L. Liu, J.L.<br>Han, L.S. Sun & W.W. Li | OK167141 | OK168178 | –        | –        |

|    |          |                                    |          |                         |      |                                                      |          |          |          |          |
|----|----------|------------------------------------|----------|-------------------------|------|------------------------------------------------------|----------|----------|----------|----------|
| 11 | 20–40 cm | 20200715-1-(1)_0–40<br>cm_A_R1_SC2 | CSF20449 | <i>C. hongkongensis</i> | AA-- | S.F. Chen, L.L. Liu, J.L.<br>Han, L.S. Sun & W.W. Li | OK167142 | OK168179 | –        | –        |
| 11 | 20–40 cm | 20200715-1-(1)_0–40<br>cm_A_R1_SC3 | CSF20450 | <i>C. hongkongensis</i> | AA-- | S.F. Chen, L.L. Liu, J.L.<br>Han, L.S. Sun & W.W. Li | OK167143 | OK168180 | –        | –        |
| 11 | 20–40 cm | 20200715-1-(1)_0–40<br>cm_A_R1_SC4 | CSF20451 | <i>C. hongkongensis</i> | AA-- | S.F. Chen, L.L. Liu, J.L.<br>Han, L.S. Sun & W.W. Li | OK167144 | OK168181 | –        | –        |
| 11 | 20–40 cm | 20200715-1-(1)_0–40<br>cm_A_R2_SC1 | CSF20452 | <i>C. hongkongensis</i> | AA-- | S.F. Chen, L.L. Liu, J.L.<br>Han, L.S. Sun & W.W. Li | OK167145 | OK168182 | –        | –        |
| 11 | 20–40 cm | 20200715-1-(1)_0–40<br>cm_A_R2_SC2 | CSF20453 | <i>C. hongkongensis</i> | AA-- | S.F. Chen, L.L. Liu, J.L.<br>Han, L.S. Sun & W.W. Li | OK167146 | OK168183 | –        | –        |
| 11 | 20–40 cm | 20200715-1-(1)_0–40<br>cm_A_R2_SC3 | CSF20454 | <i>C. hongkongensis</i> | ADAA | S.F. Chen, L.L. Liu, J.L.<br>Han, L.S. Sun & W.W. Li | OK167602 | OK168639 | OK169119 | OK169203 |
| 11 | 20–40 cm | 20200715-1-(1)_0–40<br>cm_A_R2_SC4 | CSF20455 | <i>C. hongkongensis</i> | AD-- | S.F. Chen, L.L. Liu, J.L.<br>Han, L.S. Sun & W.W. Li | OK167603 | OK168640 | –        | –        |
| 11 | 20–40 cm | 20200715-1-(1)_0–40<br>cm_B_R1_SC1 | CSF20456 | <i>C. hongkongensis</i> | AA-- | S.F. Chen, L.L. Liu, J.L.<br>Han, L.S. Sun & W.W. Li | OK167147 | OK168184 | –        | –        |
| 11 | 20–40 cm | 20200715-1-(1)_0–40<br>cm_B_R1_SC2 | CSF20457 | <i>C. hongkongensis</i> | AA-- | S.F. Chen, L.L. Liu, J.L.<br>Han, L.S. Sun & W.W. Li | OK167148 | OK168185 | –        | –        |
| 11 | 20–40 cm | 20200715-1-(1)_0–40<br>cm_B_R1_SC3 | CSF20458 | <i>C. hongkongensis</i> | AA-- | S.F. Chen, L.L. Liu, J.L.<br>Han, L.S. Sun & W.W. Li | OK167149 | OK168186 | –        | –        |
| 11 | 20–40 cm | 20200715-1-(1)_0–40<br>cm_B_R1_SC4 | CSF20459 | <i>C. hongkongensis</i> | AA-- | S.F. Chen, L.L. Liu, J.L.<br>Han, L.S. Sun & W.W. Li | OK167150 | OK168187 | –        | –        |
| 11 | 20–40 cm | 20200715-1-(1)_0–40<br>cm_B_R2_SC1 | CSF20460 | <i>C. hongkongensis</i> | AA-- | S.F. Chen, L.L. Liu, J.L.<br>Han, L.S. Sun & W.W. Li | OK167151 | OK168188 | –        | –        |
| 11 | 20–40 cm | 20200715-1-(1)_0–40<br>cm_B_R2_SC2 | CSF20461 | <i>C. hongkongensis</i> | AA-- | S.F. Chen, L.L. Liu, J.L.<br>Han, L.S. Sun & W.W. Li | OK167152 | OK168189 | –        | –        |
| 11 | 20–40 cm | 20200715-1-(1)_0–40<br>cm_B_R2_SC3 | CSF20462 | <i>C. hongkongensis</i> | AA-- | S.F. Chen, L.L. Liu, J.L.<br>Han, L.S. Sun & W.W. Li | OK167153 | OK168190 | –        | –        |
| 11 | 20–40 cm | 20200715-1-(1)_0–40<br>cm_B_R2_SC4 | CSF20463 | <i>C. hongkongensis</i> | AA-- | S.F. Chen, L.L. Liu, J.L.<br>Han, L.S. Sun & W.W. Li | OK167154 | OK168191 | –        | –        |
| 11 | 40–60 cm | 20200715-1-(1)_0–60<br>cm_B_R1_SC1 | CSF20464 | <i>C. hongkongensis</i> | AA-- | S.F. Chen, L.L. Liu, J.L.<br>Han, L.S. Sun & W.W. Li | OK167155 | OK168192 | –        | –        |
| 11 | 40–60 cm | 20200715-1-(1)_0–60<br>cm_B_R1_SC2 | CSF20465 | <i>C. hongkongensis</i> | AA-- | S.F. Chen, L.L. Liu, J.L.<br>Han, L.S. Sun & W.W. Li | OK167156 | OK168193 | –        | –        |

|    |          |                                    |          |                         |      |                                                      |          |          |          |          |
|----|----------|------------------------------------|----------|-------------------------|------|------------------------------------------------------|----------|----------|----------|----------|
| 11 | 40–60 cm | 20200715-1-(1)_0–60<br>cm_B_R1_SC3 | CSF20466 | <i>C. hongkongensis</i> | AA-- | S.F. Chen, L.L. Liu, J.L.<br>Han, L.S. Sun & W.W. Li | OK167157 | OK168194 | –        | –        |
| 11 | 40–60 cm | 20200715-1-(1)_0–60<br>cm_B_R1_SC4 | CSF20467 | <i>C. hongkongensis</i> | AA-- | S.F. Chen, L.L. Liu, J.L.<br>Han, L.S. Sun & W.W. Li | OK167158 | OK168195 | –        | –        |
| 12 | 0–20 cm  | 20200715-1-(2)_0–20<br>cm_A_R1_SC1 | CSF20468 | <i>C. hongkongensis</i> | AA-- | S.F. Chen, L.L. Liu, J.L.<br>Han, L.S. Sun & W.W. Li | OK167159 | OK168196 | –        | –        |
| 12 | 0–20 cm  | 20200715-1-(2)_0–20<br>cm_A_R1_SC2 | CSF20469 | <i>C. hongkongensis</i> | AA-- | S.F. Chen, L.L. Liu, J.L.<br>Han, L.S. Sun & W.W. Li | OK167160 | OK168197 | –        | –        |
| 12 | 0–20 cm  | 20200715-1-(2)_0–20<br>cm_A_R2_SC1 | CSF20470 | <i>C. hongkongensis</i> | AFAA | S.F. Chen, L.L. Liu, J.L.<br>Han, L.S. Sun & W.W. Li | OK167615 | OK168652 | OK169126 | OK169210 |
| 12 | 0–20 cm  | 20200715-1-(2)_0–20<br>cm_B_R1_SC1 | CSF20472 | <i>C. hongkongensis</i> | BAAA | S.F. Chen, L.L. Liu, J.L.<br>Han, L.S. Sun & W.W. Li | OK167649 | OK168686 | OK169136 | OK169220 |
| 12 | 0–20 cm  | 20200715-1-(2)_0–20<br>cm_B_R1_SC2 | CSF20473 | <i>C. hongkongensis</i> | AA-- | S.F. Chen, L.L. Liu, J.L.<br>Han, L.S. Sun & W.W. Li | OK167161 | OK168198 | –        | –        |
| 12 | 0–20 cm  | 20200715-1-(2)_0–20<br>cm_B_R2_SC1 | CSF20474 | <i>C. hongkongensis</i> | BA-- | S.F. Chen, L.L. Liu, J.L.<br>Han, L.S. Sun & W.W. Li | OK167650 | OK168687 | –        | –        |
| 12 | 0–20 cm  | 20200715-1-(2)_0–20<br>cm_B_R2_SC2 | CSF20475 | <i>C. hongkongensis</i> | BA-- | S.F. Chen, L.L. Liu, J.L.<br>Han, L.S. Sun & W.W. Li | OK167651 | OK168688 | –        | –        |
| 12 | 20–40 cm | 20200715-1-(2)_0–40<br>cm_B_R1_SC1 | CSF20476 | <i>C. hongkongensis</i> | AA-- | S.F. Chen, L.L. Liu, J.L.<br>Han, L.S. Sun & W.W. Li | OK167162 | OK168199 | –        | –        |
| 12 | 20–40 cm | 20200715-1-(2)_0–40<br>cm_B_R1_SC2 | CSF20477 | <i>C. hongkongensis</i> | AA-- | S.F. Chen, L.L. Liu, J.L.<br>Han, L.S. Sun & W.W. Li | OK167163 | OK168200 | –        | –        |
| 12 | 20–40 cm | 20200715-1-(2)_0–40<br>cm_B_R1_SC3 | CSF20478 | <i>C. hongkongensis</i> | AA-- | S.F. Chen, L.L. Liu, J.L.<br>Han, L.S. Sun & W.W. Li | OK167164 | OK168201 | –        | –        |
| 12 | 20–40 cm | 20200715-1-(2)_0–40<br>cm_B_R1_SC4 | CSF20479 | <i>C. hongkongensis</i> | AA-- | S.F. Chen, L.L. Liu, J.L.<br>Han, L.S. Sun & W.W. Li | OK167165 | OK168202 | –        | –        |
| 12 | 40–60 cm | 20200715-1-(2)_0–60<br>cm_B_R2_SC1 | CSF20480 | <i>C. hongkongensis</i> | AA-- | S.F. Chen, L.L. Liu, J.L.<br>Han, L.S. Sun & W.W. Li | OK167166 | OK168203 | –        | –        |
| 12 | 40–60 cm | 20200715-1-(2)_0–60<br>cm_B_R2_SC2 | CSF20481 | <i>C. hongkongensis</i> | AA-- | S.F. Chen, L.L. Liu, J.L.<br>Han, L.S. Sun & W.W. Li | OK167167 | OK168204 | –        | –        |
| 12 | 40–60 cm | 20200715-1-(2)_0–60<br>cm_B_R2_SC3 | CSF20482 | <i>C. hongkongensis</i> | AA-- | S.F. Chen, L.L. Liu, J.L.<br>Han, L.S. Sun & W.W. Li | OK167168 | OK168205 | –        | –        |
| 12 | 40–60 cm | 20200715-1-(2)_0–60<br>cm_B_R2_SC4 | CSF20483 | <i>C. hongkongensis</i> | AA-- | S.F. Chen, L.L. Liu, J.L.<br>Han, L.S. Sun & W.W. Li | OK167169 | OK168206 | –        | –        |

|    |          |                                    |          |                         |      |                                                      |          |          |   |   |
|----|----------|------------------------------------|----------|-------------------------|------|------------------------------------------------------|----------|----------|---|---|
| 13 | 0–20 cm  | 20200715-1-(3)_0–20<br>cm_A_R1_SC1 | CSF20484 | <i>C. hongkongensis</i> | AA-- | S.F. Chen, L.L. Liu, J.L.<br>Han, L.S. Sun & W.W. Li | OK167170 | OK168207 | – | – |
| 13 | 0–20 cm  | 20200715-1-(3)_0–20<br>cm_A_R1_SC2 | CSF20485 | <i>C. aconidialis</i>   | AC-- | S.F. Chen, L.L. Liu, J.L.<br>Han, L.S. Sun & W.W. Li | OK167882 | OK168919 | – | – |
| 13 | 0–20 cm  | 20200715-1-(3)_0–20<br>cm_A_R2_SC1 | CSF20486 | <i>C. aconidialis</i>   | AC-- | S.F. Chen, L.L. Liu, J.L.<br>Han, L.S. Sun & W.W. Li | OK167883 | OK168920 | – | – |
| 13 | 0–20 cm  | 20200715-1-(3)_0–20<br>cm_A_R2_SC2 | CSF20487 | <i>C. aconidialis</i>   | AC-- | S.F. Chen, L.L. Liu, J.L.<br>Han, L.S. Sun & W.W. Li | OK167884 | OK168921 | – | – |
| 13 | 0–20 cm  | 20200715-1-(3)_0–20<br>cm_B_R1_SC1 | CSF20488 | <i>C. hongkongensis</i> | AA-- | S.F. Chen, L.L. Liu, J.L.<br>Han, L.S. Sun & W.W. Li | OK167171 | OK168208 | – | – |
| 13 | 0–20 cm  | 20200715-1-(3)_0–20<br>cm_B_R2_SC1 | CSF20490 | <i>C. hongkongensis</i> | AA-- | S.F. Chen, L.L. Liu, J.L.<br>Han, L.S. Sun & W.W. Li | OK167172 | OK168209 | – | – |
| 13 | 0–20 cm  | 20200715-1-(3)_0–20<br>cm_B_R2_SC2 | CSF20491 | <i>C. hongkongensis</i> | AA-- | S.F. Chen, L.L. Liu, J.L.<br>Han, L.S. Sun & W.W. Li | OK167173 | OK168210 | – | – |
| 14 | 0–20 cm  | 20200715-1-(4)_0–20<br>cm_A_R1_SC1 | CSF20492 | <i>C. aconidialis</i>   | AA-- | S.F. Chen, L.L. Liu, J.L.<br>Han, L.S. Sun & W.W. Li | OK167705 | OK168742 | – | – |
| 14 | 0–20 cm  | 20200715-1-(4)_0–20<br>cm_A_R1_SC2 | CSF20493 | <i>C. hongkongensis</i> | AA-- | S.F. Chen, L.L. Liu, J.L.<br>Han, L.S. Sun & W.W. Li | OK167174 | OK168211 | – | – |
| 14 | 0–20 cm  | 20200715-1-(4)_0–20<br>cm_A_R2_SC1 | CSF20494 | <i>C. hongkongensis</i> | AA-- | S.F. Chen, L.L. Liu, J.L.<br>Han, L.S. Sun & W.W. Li | OK167175 | OK168212 | – | – |
| 14 | 0–20 cm  | 20200715-1-(4)_0–20<br>cm_A_R2_SC2 | CSF20495 | <i>C. hongkongensis</i> | AA-- | S.F. Chen, L.L. Liu, J.L.<br>Han, L.S. Sun & W.W. Li | OK167176 | OK168213 | – | – |
| 14 | 0–20 cm  | 20200715-1-(4)_0–20<br>cm_B_R1_SC1 | CSF20496 | <i>C. aconidialis</i>   | AA-- | S.F. Chen, L.L. Liu, J.L.<br>Han, L.S. Sun & W.W. Li | OK167706 | OK168743 | – | – |
| 14 | 0–20 cm  | 20200715-1-(4)_0–20<br>cm_B_R1_SC2 | CSF20497 | <i>C. aconidialis</i>   | AA-- | S.F. Chen, L.L. Liu, J.L.<br>Han, L.S. Sun & W.W. Li | OK167707 | OK168744 | – | – |
| 14 | 0–20 cm  | 20200715-1-(4)_0–20<br>cm_B_R2_SC1 | CSF20498 | <i>C. hongkongensis</i> | AA-- | S.F. Chen, L.L. Liu, J.L.<br>Han, L.S. Sun & W.W. Li | OK167177 | OK168214 | – | – |
| 14 | 0–20 cm  | 20200715-1-(4)_0–20<br>cm_B_R2_SC2 | CSF20499 | <i>C. aconidialis</i>   | AA-- | S.F. Chen, L.L. Liu, J.L.<br>Han, L.S. Sun & W.W. Li | OK167708 | OK168745 | – | – |
| 14 | 20–40 cm | 20200715-1-(4)_0–40<br>cm_A_R1_SC1 | CSF20500 | <i>C. hongkongensis</i> | AA-- | S.F. Chen, L.L. Liu, J.L.<br>Han, L.S. Sun & W.W. Li | OK167178 | OK168215 | – | – |
| 14 | 20–40 cm | 20200715-1-(4)_0–40<br>cm_A_R1_SC2 | CSF20501 | <i>C. hongkongensis</i> | AA-- | S.F. Chen, L.L. Liu, J.L.<br>Han, L.S. Sun & W.W. Li | OK167179 | OK168216 | – | – |

|    |          |                                    |          |                         |      |                                                      |          |          |          |          |
|----|----------|------------------------------------|----------|-------------------------|------|------------------------------------------------------|----------|----------|----------|----------|
| 14 | 20–40 cm | 20200715-1-(4)_0–40<br>cm_A_R1_SC3 | CSF20502 | <i>C. hongkongensis</i> | AA-- | S.F. Chen, L.L. Liu, J.L.<br>Han, L.S. Sun & W.W. Li | OK167180 | OK168217 | –        | –        |
| 14 | 20–40 cm | 20200715-1-(4)_0–40<br>cm_A_R1_SC4 | CSF20503 | <i>C. hongkongensis</i> | AA-- | S.F. Chen, L.L. Liu, J.L.<br>Han, L.S. Sun & W.W. Li | OK167181 | OK168218 | –        | –        |
| 14 | 20–40 cm | 20200715-1-(4)_0–40<br>cm_A_R2_SC2 | CSF20505 | <i>C. hongkongensis</i> | AA-- | S.F. Chen, L.L. Liu, J.L.<br>Han, L.S. Sun & W.W. Li | OK167182 | OK168219 | –        | –        |
| 14 | 20–40 cm | 20200715-1-(4)_0–40<br>cm_A_R2_SC3 | CSF20506 | <i>C. hongkongensis</i> | AA-- | S.F. Chen, L.L. Liu, J.L.<br>Han, L.S. Sun & W.W. Li | OK167183 | OK168220 | –        | –        |
| 14 | 20–40 cm | 20200715-1-(4)_0–40<br>cm_A_R2_SC4 | CSF20507 | <i>C. hongkongensis</i> | AA-- | S.F. Chen, L.L. Liu, J.L.<br>Han, L.S. Sun & W.W. Li | OK167184 | OK168221 | –        | –        |
| 14 | 40–60 cm | 20200715-1-(4)_0–60<br>cm_A_R1_SC1 | CSF20508 | <i>C. hongkongensis</i> | AA-- | S.F. Chen, L.L. Liu, J.L.<br>Han, L.S. Sun & W.W. Li | OK167185 | OK168222 | –        | –        |
| 14 | 40–60 cm | 20200715-1-(4)_0–60<br>cm_A_R1_SC2 | CSF20509 | <i>C. hongkongensis</i> | AA-- | S.F. Chen, L.L. Liu, J.L.<br>Han, L.S. Sun & W.W. Li | OK167186 | OK168223 | –        | –        |
| 14 | 40–60 cm | 20200715-1-(4)_0–60<br>cm_A_R1_SC3 | CSF20510 | <i>C. hongkongensis</i> | AA-- | S.F. Chen, L.L. Liu, J.L.<br>Han, L.S. Sun & W.W. Li | OK167187 | OK168224 | –        | –        |
| 14 | 40–60 cm | 20200715-1-(4)_0–60<br>cm_A_R1_SC4 | CSF20511 | <i>C. hongkongensis</i> | AA-- | S.F. Chen, L.L. Liu, J.L.<br>Han, L.S. Sun & W.W. Li | OK167188 | OK168225 | –        | –        |
| 14 | 40–60 cm | 20200715-1-(4)_0–60<br>cm_B_R1_SC1 | CSF20512 | <i>C. hongkongensis</i> | AA-- | S.F. Chen, L.L. Liu, J.L.<br>Han, L.S. Sun & W.W. Li | OK167189 | OK168226 | –        | –        |
| 14 | 40–60 cm | 20200715-1-(4)_0–60<br>cm_B_R1_SC2 | CSF20513 | <i>C. hongkongensis</i> | AA-- | S.F. Chen, L.L. Liu, J.L.<br>Han, L.S. Sun & W.W. Li | OK167190 | OK168227 | –        | –        |
| 14 | 40–60 cm | 20200715-1-(4)_0–60<br>cm_B_R1_SC4 | CSF20515 | <i>C. hongkongensis</i> | AA-- | S.F. Chen, L.L. Liu, J.L.<br>Han, L.S. Sun & W.W. Li | OK167191 | OK168228 | –        | –        |
| 15 | 0–20 cm  | 20200715-1-(5)_0–20<br>cm_B_R1_SC1 | CSF20516 | <i>C. hongkongensis</i> | AA-- | S.F. Chen, L.L. Liu, J.L.<br>Han, L.S. Sun & W.W. Li | OK167192 | OK168229 | –        | –        |
| 16 | 0–20 cm  | 20200715-1-(6)_0–20<br>cm_B_R2_SC1 | CSF20518 | <i>C. kyotensis</i>     | AAAB | S.F. Chen, L.L. Liu, J.L.<br>Han, L.S. Sun & W.W. Li | OK167953 | OK168990 | OK169162 | OK169246 |
| 16 | 0–20 cm  | 20200715-1-(6)_0–20<br>cm_B_R2_SC2 | CSF20519 | <i>C. kyotensis</i>     | AA-- | S.F. Chen, L.L. Liu, J.L.<br>Han, L.S. Sun & W.W. Li | OK167954 | OK168991 | –        | –        |
| 17 | 0–20 cm  | 20200715-1-(7)_0–20<br>cm_A_R1_SC1 | CSF20520 | <i>C. aconidialis</i>   | AC-- | S.F. Chen, L.L. Liu, J.L.<br>Han, L.S. Sun & W.W. Li | OK167885 | OK168922 | –        | –        |
| 17 | 0–20 cm  | 20200715-1-(7)_0–20<br>cm_A_R1_SC2 | CSF20521 | <i>C. hongkongensis</i> | AA-- | S.F. Chen, L.L. Liu, J.L.<br>Han, L.S. Sun & W.W. Li | OK167193 | OK168230 | –        | –        |

|    |          |                                    |          |                         |      |                                                      |          |          |          |          |
|----|----------|------------------------------------|----------|-------------------------|------|------------------------------------------------------|----------|----------|----------|----------|
| 17 | 0–20 cm  | 20200715-1-(7)_0–20<br>cm_A_R2_SC2 | CSF20523 | <i>C. hongkongensis</i> | AA-- | S.F. Chen, L.L. Liu, J.L.<br>Han, L.S. Sun & W.W. Li | OK167194 | OK168231 | –        | –        |
| 17 | 0–20 cm  | 20200715-1-(7)_0–20<br>cm_B_R1_SC1 | CSF20524 | <i>C. hongkongensis</i> | ACAA | S.F. Chen, L.L. Liu, J.L.<br>Han, L.S. Sun & W.W. Li | OK167597 | OK168634 | OK169114 | OK169198 |
| 17 | 0–20 cm  | 20200715-1-(7)_0–20<br>cm_B_R1_SC2 | CSF20525 | <i>C. hongkongensis</i> | ACAA | S.F. Chen, L.L. Liu, J.L.<br>Han, L.S. Sun & W.W. Li | OK167598 | OK168635 | OK169115 | OK169199 |
| 17 | 0–20 cm  | 20200715-1-(7)_0–20<br>cm_B_R2_SC1 | CSF20526 | <i>C. hongkongensis</i> | AA-- | S.F. Chen, L.L. Liu, J.L.<br>Han, L.S. Sun & W.W. Li | OK167195 | OK168232 | –        | –        |
| 17 | 0–20 cm  | 20200715-1-(7)_0–20<br>cm_B_R2_SC2 | CSF20527 | <i>C. hongkongensis</i> | AA-- | S.F. Chen, L.L. Liu, J.L.<br>Han, L.S. Sun & W.W. Li | OK167196 | OK168233 | –        | –        |
| 17 | 40–60 cm | 20200715-1-(7)_0–60<br>cm_A_R1_SC1 | CSF20528 | <i>C. hongkongensis</i> | AGAA | S.F. Chen, L.L. Liu, J.L.<br>Han, L.S. Sun & W.W. Li | OK167632 | OK168669 | OK169130 | OK169214 |
| 17 | 40–60 cm | 20200715-1-(7)_0–60<br>cm_A_R1_SC2 | CSF20529 | <i>C. hongkongensis</i> | AG-- | S.F. Chen, L.L. Liu, J.L.<br>Han, L.S. Sun & W.W. Li | OK167633 | OK168670 | –        | –        |
| 17 | 40–60 cm | 20200715-1-(7)_0–60<br>cm_A_R1_SC3 | CSF20530 | <i>C. hongkongensis</i> | AG-- | S.F. Chen, L.L. Liu, J.L.<br>Han, L.S. Sun & W.W. Li | OK167634 | OK168671 | –        | –        |
| 17 | 40–60 cm | 20200715-1-(7)_0–60<br>cm_A_R1_SC4 | CSF20531 | <i>C. hongkongensis</i> | AG-- | S.F. Chen, L.L. Liu, J.L.<br>Han, L.S. Sun & W.W. Li | OK167635 | OK168672 | –        | –        |
| 17 | 40–60 cm | 20200715-1-(7)_0–60<br>cm_B_R2_SC1 | CSF20532 | <i>C. hongkongensis</i> | DA-- | S.F. Chen, L.L. Liu, J.L.<br>Han, L.S. Sun & W.W. Li | OK167679 | OK168716 | –        | –        |
| 17 | 40–60 cm | 20200715-1-(7)_0–60<br>cm_B_R2_SC2 | CSF20533 | <i>C. hongkongensis</i> | DA-- | S.F. Chen, L.L. Liu, J.L.<br>Han, L.S. Sun & W.W. Li | OK167680 | OK168717 | –        | –        |
| 17 | 40–60 cm | 20200715-1-(7)_0–60<br>cm_B_R2_SC3 | CSF20534 | <i>C. hongkongensis</i> | DA-- | S.F. Chen, L.L. Liu, J.L.<br>Han, L.S. Sun & W.W. Li | OK167681 | OK168718 | –        | –        |
| 18 | 0–20 cm  | 20200716-1-(1)_0–20<br>cm_A_R1_SC1 | CSF20536 | <i>C. aconidialis</i>   | AA-- | S.F. Chen, L.L. Liu, J.L.<br>Han & L.S. Sun          | OK167709 | OK168746 | –        | –        |
| 18 | 0–20 cm  | 20200716-1-(1)_0–20<br>cm_A_R1_SC2 | CSF20537 | <i>C. aconidialis</i>   | AA-- | S.F. Chen, L.L. Liu, J.L.<br>Han & L.S. Sun          | OK167710 | OK168747 | –        | –        |
| 18 | 0–20 cm  | 20200716-1-(1)_0–20<br>cm_A_R2_SC1 | CSF20538 | <i>C. aconidialis</i>   | AA-- | S.F. Chen, L.L. Liu, J.L.<br>Han & L.S. Sun          | OK167711 | OK168748 | –        | –        |
| 18 | 0–20 cm  | 20200716-1-(1)_0–20<br>cm_A_R2_SC2 | CSF20539 | <i>C. aconidialis</i>   | AA-- | S.F. Chen, L.L. Liu, J.L.<br>Han & L.S. Sun          | OK167712 | OK168749 | –        | –        |
| 20 | 0–20 cm  | 20200716-1-(3)_0–20<br>cm_A_R1_SC1 | CSF20540 | <i>C. hongkongensis</i> | AA-- | S.F. Chen, L.L. Liu, J.L.<br>Han & L.S. Sun          | OK167197 | OK168234 | –        | –        |



|    |          |                                    |          |                         |      |                                             |          |          |   |   |
|----|----------|------------------------------------|----------|-------------------------|------|---------------------------------------------|----------|----------|---|---|
| 20 | 0–20 cm  | 20200716-1-(3)_0–20<br>cm_A_R1_SC2 | CSF20541 | <i>C. hongkongensis</i> | AA-- | S.F. Chen, L.L. Liu, J.L.<br>Han & L.S. Sun | OK167198 | OK168235 | – | – |
| 20 | 0–20 cm  | 20200716-1-(3)_0–20<br>cm_A_R2_SC1 | CSF20542 | <i>C. hongkongensis</i> | AA-- | S.F. Chen, L.L. Liu, J.L.<br>Han & L.S. Sun | OK167199 | OK168236 | – | – |
| 20 | 0–20 cm  | 20200716-1-(3)_0–20<br>cm_A_R2_SC2 | CSF20543 | <i>C. hongkongensis</i> | AA-- | S.F. Chen, L.L. Liu, J.L.<br>Han & L.S. Sun | OK167200 | OK168237 | – | – |
| 20 | 0–20 cm  | 20200716-1-(3)_0–20<br>cm_B_R2_SC1 | CSF20544 | <i>C. hongkongensis</i> | AA-- | S.F. Chen, L.L. Liu, J.L.<br>Han & L.S. Sun | OK167201 | OK168238 | – | – |
| 20 | 0–20 cm  | 20200716-1-(3)_0–20<br>cm_B_R2_SC2 | CSF20545 | <i>C. hongkongensis</i> | AA-- | S.F. Chen, L.L. Liu, J.L.<br>Han & L.S. Sun | OK167202 | OK168239 | – | – |
| 21 | 0–20 cm  | 20200716-1-(4)_0–20<br>cm_A_R1_SC1 | CSF20546 | <i>C. hongkongensis</i> | AA-- | S.F. Chen, L.L. Liu, J.L.<br>Han & L.S. Sun | OK167203 | OK168240 | – | – |
| 21 | 0–20 cm  | 20200716-1-(4)_0–20<br>cm_A_R1_SC2 | CSF20547 | <i>C. hongkongensis</i> | AA-- | S.F. Chen, L.L. Liu, J.L.<br>Han & L.S. Sun | OK167204 | OK168241 | – | – |
| 21 | 0–20 cm  | 20200716-1-(4)_0–20<br>cm_A_R2_SC1 | CSF20548 | <i>C. hongkongensis</i> | AA-- | S.F. Chen, L.L. Liu, J.L.<br>Han & L.S. Sun | OK167205 | OK168242 | – | – |
| 21 | 0–20 cm  | 20200716-1-(4)_0–20<br>cm_B_R1_SC1 | CSF20550 | <i>C. hongkongensis</i> | AF-- | S.F. Chen, L.L. Liu, J.L.<br>Han & L.S. Sun | OK167616 | OK168653 | – | – |
| 21 | 0–20 cm  | 20200716-1-(4)_0–20<br>cm_B_R1_SC2 | CSF20551 | <i>C. hongkongensis</i> | AF-- | S.F. Chen, L.L. Liu, J.L.<br>Han & L.S. Sun | OK167617 | OK168654 | – | – |
| 21 | 0–20 cm  | 20200716-1-(4)_0–20<br>cm_B_R2_SC1 | CSF20552 | <i>C. hongkongensis</i> | AA-- | S.F. Chen, L.L. Liu, J.L.<br>Han & L.S. Sun | OK167206 | OK168243 | – | – |
| 21 | 0–20 cm  | 20200716-1-(4)_0–20<br>cm_B_R2_SC2 | CSF20553 | <i>C. hongkongensis</i> | AA-- | S.F. Chen, L.L. Liu, J.L.<br>Han & L.S. Sun | OK167207 | OK168244 | – | – |
| 21 | 20–40 cm | 20200716-1-(4)_0–40<br>cm_A_R1_SC1 | CSF20554 | <i>C. hongkongensis</i> | AA-- | S.F. Chen, L.L. Liu, J.L.<br>Han & L.S. Sun | OK167208 | OK168245 | – | – |
| 21 | 20–40 cm | 20200716-1-(4)_0–40<br>cm_A_R1_SC2 | CSF20555 | <i>C. hongkongensis</i> | AA-- | S.F. Chen, L.L. Liu, J.L.<br>Han & L.S. Sun | OK167209 | OK168246 | – | – |
| 21 | 20–40 cm | 20200716-1-(4)_0–40<br>cm_A_R1_SC3 | CSF20556 | <i>C. hongkongensis</i> | AA-- | S.F. Chen, L.L. Liu, J.L.<br>Han & L.S. Sun | OK167210 | OK168247 | – | – |
| 21 | 20–40 cm | 20200716-1-(4)_0–40<br>cm_A_R1_SC4 | CSF20557 | <i>C. hongkongensis</i> | AA-- | S.F. Chen, L.L. Liu, J.L.<br>Han & L.S. Sun | OK167211 | OK168248 | – | – |
| 21 | 20–40 cm | 20200716-1-(4)_0–40<br>cm_B_R1_SC1 | CSF20558 | <i>C. hongkongensis</i> | AA-- | S.F. Chen, L.L. Liu, J.L.<br>Han & L.S. Sun | OK167212 | OK168249 | – | – |

|    |          |                                    |          |                         |      |                                             |          |          |   |   |
|----|----------|------------------------------------|----------|-------------------------|------|---------------------------------------------|----------|----------|---|---|
| 21 | 20–40 cm | 20200716-1-(4)_0–40<br>cm_B_R1_SC3 | CSF20560 | <i>C. hongkongensis</i> | AA-- | S.F. Chen, L.L. Liu, J.L.<br>Han & L.S. Sun | OK167213 | OK168250 | – | – |
| 21 | 20–40 cm | 20200716-1-(4)_0–40<br>cm_B_R1_SC4 | CSF20561 | <i>C. hongkongensis</i> | AA-- | S.F. Chen, L.L. Liu, J.L.<br>Han & L.S. Sun | OK167214 | OK168251 | – | – |
| 21 | 20–40 cm | 20200716-1-(4)_0–40<br>cm_B_R2_SC1 | CSF20562 | <i>C. hongkongensis</i> | AA-- | S.F. Chen, L.L. Liu, J.L.<br>Han & L.S. Sun | OK167215 | OK168252 | – | – |
| 21 | 20–40 cm | 20200716-1-(4)_0–40<br>cm_B_R2_SC2 | CSF20563 | <i>C. hongkongensis</i> | AA-- | S.F. Chen, L.L. Liu, J.L.<br>Han & L.S. Sun | OK167216 | OK168253 | – | – |
| 21 | 20–40 cm | 20200716-1-(4)_0–40<br>cm_B_R2_SC3 | CSF20564 | <i>C. hongkongensis</i> | AA-- | S.F. Chen, L.L. Liu, J.L.<br>Han & L.S. Sun | OK167217 | OK168254 | – | – |
| 21 | 20–40 cm | 20200716-1-(4)_0–40<br>cm_B_R2_SC4 | CSF20565 | <i>C. hongkongensis</i> | AA-- | S.F. Chen, L.L. Liu, J.L.<br>Han & L.S. Sun | OK167218 | OK168255 | – | – |
| 22 | 40–60 cm | 20200716-1-(5)_0–60<br>cm_B_R2_SC1 | CSF20566 | <i>C. hongkongensis</i> | AA-- | S.F. Chen, L.L. Liu, J.L.<br>Han & L.S. Sun | OK167219 | OK168256 | – | – |
| 22 | 40–60 cm | 20200716-1-(5)_0–60<br>cm_B_R2_SC2 | CSF20567 | <i>C. hongkongensis</i> | AA-- | S.F. Chen, L.L. Liu, J.L.<br>Han & L.S. Sun | OK167220 | OK168257 | – | – |
| 22 | 40–60 cm | 20200716-1-(5)_0–60<br>cm_B_R2_SC3 | CSF20568 | <i>C. hongkongensis</i> | AA-- | S.F. Chen, L.L. Liu, J.L.<br>Han & L.S. Sun | OK167221 | OK168258 | – | – |
| 22 | 40–60 cm | 20200716-1-(5)_0–60<br>cm_B_R2_SC4 | CSF20569 | <i>C. hongkongensis</i> | AA-- | S.F. Chen, L.L. Liu, J.L.<br>Han & L.S. Sun | OK167222 | OK168259 | – | – |
| 25 | 0–20 cm  | 20200727-1-(1)_0–20<br>cm_A_R2_SC1 | CSF20570 | <i>C. hongkongensis</i> | AA-- | L.L. Liu, J.L. Han & L.S.<br>Sun            | OK167223 | OK168260 | – | – |
| 25 | 0–20 cm  | 20200727-1-(1)_0–20<br>cm_A_R2_SC2 | CSF20571 | <i>C. aconidialis</i>   | AA-- | L.L. Liu, J.L. Han & L.S.<br>Sun            | OK167713 | OK168750 | – | – |
| 25 | 0–20 cm  | 20200727-1-(1)_0–20<br>cm_B_R1_SC1 | CSF20572 | <i>C. hongkongensis</i> | AA-- | L.L. Liu, J.L. Han & L.S.<br>Sun            | OK167224 | OK168261 | – | – |
| 25 | 0–20 cm  | 20200727-1-(1)_0–20<br>cm_B_R1_SC2 | CSF20573 | <i>C. hongkongensis</i> | AA-- | L.L. Liu, J.L. Han & L.S.<br>Sun            | OK167225 | OK168262 | – | – |
| 25 | 0–20 cm  | 20200727-1-(1)_0–20<br>cm_B_R2_SC1 | CSF20574 | <i>C. aconidialis</i>   | AA-- | L.L. Liu, J.L. Han & L.S.<br>Sun            | OK167714 | OK168751 | – | – |
| 25 | 0–20 cm  | 20200727-1-(1)_0–20<br>cm_B_R2_SC2 | CSF20575 | <i>C. aconidialis</i>   | AC-- | L.L. Liu, J.L. Han & L.S.<br>Sun            | OK167886 | OK168923 | – | – |
| 27 | 0–20 cm  | 20200727-1-(3)_0–20<br>cm_A_R1_SC1 | CSF20576 | <i>C. hongkongensis</i> | AA-- | L.L. Liu, J.L. Han & L.S.<br>Sun            | OK167226 | OK168263 | – | – |

|    |          |                                    |          |                         |      |                                  |          |          |          |          |
|----|----------|------------------------------------|----------|-------------------------|------|----------------------------------|----------|----------|----------|----------|
| 27 | 0–20 cm  | 20200727-1-(3)_0–20<br>cm_A_R1_SC2 | CSF20577 | <i>C. hongkongensis</i> | AA-- | L.L. Liu, J.L. Han & L.S.<br>Sun | OK167227 | OK168264 | –        | –        |
| 27 | 0–20 cm  | 20200727-1-(3)_0–20<br>cm_A_R2_SC1 | CSF20578 | <i>C. aconidialis</i>   | AA-- | L.L. Liu, J.L. Han & L.S.<br>Sun | OK167715 | OK168752 | –        | –        |
| 27 | 0–20 cm  | 20200727-1-(3)_0–20<br>cm_A_R2_SC2 | CSF20579 | <i>C. aconidialis</i>   | AA-- | L.L. Liu, J.L. Han & L.S.<br>Sun | OK167716 | OK168753 | –        | –        |
| 27 | 0–20 cm  | 20200727-1-(3)_0–20<br>cm_B_R2_SC1 | CSF20580 | <i>C. aconidialis</i>   | AA-- | L.L. Liu, J.L. Han & L.S.<br>Sun | OK167717 | OK168754 | –        | –        |
| 27 | 0–20 cm  | 20200727-1-(3)_0–20<br>cm_B_R2_SC2 | CSF20581 | <i>C. aconidialis</i>   | AA-- | L.L. Liu, J.L. Han & L.S.<br>Sun | OK167718 | OK168755 | –        | –        |
| 27 | 40–60 cm | 20200727-1-(3)_0–60<br>cm_B_R1_SC1 | CSF20582 | <i>C. aconidialis</i>   | AA-- | L.L. Liu, J.L. Han & L.S.<br>Sun | OK167719 | OK168756 | –        | –        |
| 27 | 40–60 cm | 20200727-1-(3)_0–60<br>cm_B_R1_SC2 | CSF20583 | <i>C. aconidialis</i>   | AA-- | L.L. Liu, J.L. Han & L.S.<br>Sun | OK167720 | OK168757 | –        | –        |
| 27 | 40–60 cm | 20200727-1-(3)_0–60<br>cm_B_R1_SC3 | CSF20584 | <i>C. aconidialis</i>   | AA-- | L.L. Liu, J.L. Han & L.S.<br>Sun | OK167721 | OK168758 | –        | –        |
| 27 | 40–60 cm | 20200727-1-(3)_0–60<br>cm_B_R1_SC4 | CSF20585 | <i>C. aconidialis</i>   | AA-- | L.L. Liu, J.L. Han & L.S.<br>Sun | OK167722 | OK168759 | –        | –        |
| 28 | 0–20 cm  | 20200727-1-(4)_0–20<br>cm_A_R1_SC1 | CSF20586 | <i>C. hongkongensis</i> | AA-- | L.L. Liu, J.L. Han & L.S.<br>Sun | OK167228 | OK168265 | –        | –        |
| 28 | 0–20 cm  | 20200727-1-(4)_0–20<br>cm_A_R1_SC2 | CSF20587 | <i>C. hongkongensis</i> | AA-- | L.L. Liu, J.L. Han & L.S.<br>Sun | OK167229 | OK168266 | –        | –        |
| 28 | 0–20 cm  | 20200727-1-(4)_0–20<br>cm_A_R2_SC1 | CSF20588 | <i>C. hongkongensis</i> | AA-- | L.L. Liu, J.L. Han & L.S.<br>Sun | OK167230 | OK168267 | –        | –        |
| 28 | 0–20 cm  | 20200727-1-(4)_0–20<br>cm_A_R2_SC2 | CSF20589 | <i>C. hongkongensis</i> | AA-- | L.L. Liu, J.L. Han & L.S.<br>Sun | OK167231 | OK168268 | –        | –        |
| 28 | 20–40 cm | 20200727-1-(4)_0–40<br>cm_B_R2_SC1 | CSF20590 | <i>C. hongkongensis</i> | AA-- | L.L. Liu, J.L. Han & L.S.<br>Sun | OK167232 | OK168269 | –        | –        |
| 28 | 20–40 cm | 20200727-1-(4)_0–40<br>cm_B_R2_SC3 | CSF20592 | <i>C. hongkongensis</i> | AA-- | L.L. Liu, J.L. Han & L.S.<br>Sun | OK167233 | OK168270 | –        | –        |
| 28 | 20–40 cm | 20200727-1-(4)_0–40<br>cm_B_R2_SC4 | CSF20593 | <i>C. hongkongensis</i> | AA-- | L.L. Liu, J.L. Han & L.S.<br>Sun | OK167234 | OK168271 | –        | –        |
| 29 | 0–20 cm  | 20200727-1-(5)_0–20<br>cm_A_R2_SC1 | CSF20594 | <i>C. ilicicola</i>     | AAAB | L.L. Liu, J.L. Han & L.S.<br>Sun | OK168008 | OK169045 | OK169172 | OK169256 |

|    |          |                                    |          |                         |      |                                                  |          |          |          |          |
|----|----------|------------------------------------|----------|-------------------------|------|--------------------------------------------------|----------|----------|----------|----------|
| 29 | 0–20 cm  | 20200727-1-(5)_0–20<br>cm_A_R2_SC2 | CSF20595 | <i>C. ilicicola</i>     | AA-- | L.L. Liu, J.L. Han & L.S. Sun                    | OK168009 | OK169046 | –        | –        |
| 30 | 0–20 cm  | 20200727-1-(6)_0–20<br>cm_A_R2_SC1 | CSF20596 | <i>C. aconidialis</i>   | AA-- | L.L. Liu, J.L. Han & L.S. Sun                    | OK167723 | OK168760 | –        | –        |
| 30 | 0–20 cm  | 20200727-1-(6)_0–20<br>cm_A_R2_SC2 | CSF20597 | <i>C. aconidialis</i>   | AA-- | L.L. Liu, J.L. Han & L.S. Sun                    | OK167724 | OK168761 | –        | –        |
| 31 | 0–20 cm  | 20200729-1-(1)_0–20<br>cm_B_R1_SC1 | CSF20598 | <i>C. aconidialis</i>   | AA-- | L.L. Liu, J.L. Han, L.S. Sun, Y Liu & X.Y. Liang | OK167725 | OK168762 | –        | –        |
| 31 | 0–20 cm  | 20200729-1-(1)_0–20<br>cm_B_R1_SC2 | CSF20599 | <i>C. aconidialis</i>   | AA-- | L.L. Liu, J.L. Han, L.S. Sun, Y Liu & X.Y. Liang | OK167726 | OK168763 | –        | –        |
| 31 | 0–20 cm  | 20200729-1-(1)_0–20<br>cm_B_R2_SC1 | CSF20600 | <i>C. hongkongensis</i> | AA-- | L.L. Liu, J.L. Han, L.S. Sun, Y Liu & X.Y. Liang | OK167235 | OK168272 | –        | –        |
| 31 | 0–20 cm  | 20200729-1-(1)_0–20<br>cm_B_R2_SC2 | CSF20601 | <i>C. hongkongensis</i> | AA-- | L.L. Liu, J.L. Han, L.S. Sun, Y Liu & X.Y. Liang | OK167236 | OK168273 | –        | –        |
| 31 | 40–60 cm | 20200729-1-(1)_0–60<br>cm_A_R1_SC1 | CSF20602 | <i>C. orientalis</i>    | AAAA | L.L. Liu, J.L. Han, L.S. Sun, Y Liu & X.Y. Liang | OK168057 | OK169094 | OK169186 | OK169270 |
| 31 | 40–60 cm | 20200729-1-(1)_0–60<br>cm_A_R1_SC2 | CSF20603 | <i>C. orientalis</i>    | AAAA | L.L. Liu, J.L. Han, L.S. Sun, Y Liu & X.Y. Liang | OK168058 | OK169095 | OK169187 | OK169271 |
| 31 | 40–60 cm | 20200729-1-(1)_0–60<br>cm_A_R1_SC3 | CSF20604 | <i>C. orientalis</i>    | AA-- | L.L. Liu, J.L. Han, L.S. Sun, Y Liu & X.Y. Liang | OK168059 | OK169096 | –        | –        |
| 31 | 40–60 cm | 20200729-1-(1)_0–60<br>cm_A_R1_SC4 | CSF20605 | <i>C. orientalis</i>    | AA-- | L.L. Liu, J.L. Han, L.S. Sun, Y Liu & X.Y. Liang | OK168060 | OK169097 | –        | –        |
| 31 | 40–60 cm | 20200729-1-(1)_0–60<br>cm_B_R1_SC1 | CSF20606 | <i>C. orientalis</i>    | AAAA | L.L. Liu, J.L. Han, L.S. Sun, Y Liu & X.Y. Liang | OK168061 | OK169098 | OK169188 | OK169272 |
| 31 | 40–60 cm | 20200729-1-(1)_0–60<br>cm_B_R1_SC2 | CSF20607 | <i>C. orientalis</i>    | AAAA | L.L. Liu, J.L. Han, L.S. Sun, Y Liu & X.Y. Liang | OK168062 | OK169099 | OK169189 | OK169273 |
| 31 | 40–60 cm | 20200729-1-(1)_0–60<br>cm_B_R1_SC3 | CSF20608 | <i>C. orientalis</i>    | AA-- | L.L. Liu, J.L. Han, L.S. Sun, Y Liu & X.Y. Liang | OK168063 | OK169100 | –        | –        |
| 31 | 40–60 cm | 20200729-1-(1)_0–60<br>cm_B_R2_SC1 | CSF20610 | <i>C. orientalis</i>    | AAAA | L.L. Liu, J.L. Han, L.S. Sun, Y Liu & X.Y. Liang | OK168064 | OK169101 | OK169190 | OK169274 |
| 31 | 40–60 cm | 20200729-1-(1)_0–60<br>cm_B_R2_SC2 | CSF20611 | <i>C. orientalis</i>    | AAAA | L.L. Liu, J.L. Han, L.S. Sun, Y Liu & X.Y. Liang | OK168065 | OK169102 | OK169191 | OK169275 |
| 31 | 40–60 cm | 20200729-1-(1)_0–60<br>cm_B_R2_SC3 | CSF20612 | <i>C. orientalis</i>    | AA-- | L.L. Liu, J.L. Han, L.S. Sun, Y Liu & X.Y. Liang | OK168066 | OK169103 | –        | –        |

|    |          |                                    |          |                         |      |                                                     |          |          |          |          |
|----|----------|------------------------------------|----------|-------------------------|------|-----------------------------------------------------|----------|----------|----------|----------|
| 31 | 40–60 cm | 20200729-1-(1)_0–60<br>cm_B_R2_SC4 | CSF20613 | <i>C. orientalis</i>    | AA-- | L.L. Liu, J.L. Han, L.S. Sun,<br>Y Liu & X.Y. Liang | OK168067 | OK169104 | –        | –        |
| 31 | 60–80 cm | 20200729-1-(1)_0–80<br>cm_B_R1_SC1 | CSF20614 | <i>C. orientalis</i>    | AAAA | L.L. Liu, J.L. Han, L.S. Sun,<br>Y Liu & X.Y. Liang | OK168068 | OK169105 | OK169192 | OK169276 |
| 31 | 60–80 cm | 20200729-1-(1)_0–80<br>cm_B_R1_SC2 | CSF20615 | <i>C. orientalis</i>    | AAAA | L.L. Liu, J.L. Han, L.S. Sun,<br>Y Liu & X.Y. Liang | OK168069 | OK169106 | OK169193 | OK169277 |
| 31 | 60–80 cm | 20200729-1-(1)_0–80<br>cm_B_R1_SC3 | CSF20616 | <i>C. orientalis</i>    | AA-- | L.L. Liu, J.L. Han, L.S. Sun,<br>Y Liu & X.Y. Liang | OK168070 | OK169107 | –        | –        |
| 31 | 60–80 cm | 20200729-1-(1)_0–80<br>cm_B_R1_SC4 | CSF20617 | <i>C. orientalis</i>    | AA-- | L.L. Liu, J.L. Han, L.S. Sun,<br>Y Liu & X.Y. Liang | OK168071 | OK169108 | –        | –        |
| 32 | 0–20 cm  | 20200729-1-(2)_0–20<br>cm_A_R1_SC1 | CSF20618 | <i>C. ilicicola</i>     | ABAA | L.L. Liu, J.L. Han, L.S. Sun,<br>Y Liu & X.Y. Liang | OK168034 | OK169071 | OK169176 | OK169260 |
| 32 | 0–20 cm  | 20200729-1-(2)_0–20<br>cm_A_R1_SC2 | CSF20619 | <i>C. ilicicola</i>     | AB-- | L.L. Liu, J.L. Han, L.S. Sun,<br>Y Liu & X.Y. Liang | OK168035 | OK169072 | –        | –        |
| 32 | 0–20 cm  | 20200729-1-(2)_0–20<br>cm_A_R2_SC1 | CSF20620 | <i>C. ilicicola</i>     | ABAA | L.L. Liu, J.L. Han, L.S. Sun,<br>Y Liu & X.Y. Liang | OK168036 | OK169073 | OK169177 | OK169261 |
| 32 | 0–20 cm  | 20200729-1-(2)_0–20<br>cm_A_R2_SC2 | CSF20621 | <i>C. ilicicola</i>     | AB-- | L.L. Liu, J.L. Han, L.S. Sun,<br>Y Liu & X.Y. Liang | OK168037 | OK169074 | –        | –        |
| 32 | 0–20 cm  | 20200729-1-(2)_0–20<br>cm_B_R1_SC1 | CSF20622 | <i>C. hongkongensis</i> | AA-- | L.L. Liu, J.L. Han, L.S. Sun,<br>Y Liu & X.Y. Liang | OK167237 | OK168274 | –        | –        |
| 32 | 0–20 cm  | 20200729-1-(2)_0–20<br>cm_B_R1_SC2 | CSF20623 | <i>C. hongkongensis</i> | AA-- | L.L. Liu, J.L. Han, L.S. Sun,<br>Y Liu & X.Y. Liang | OK167238 | OK168275 | –        | –        |
| 32 | 20–40 cm | 20200729-1-(2)_0–40<br>cm_A_R1_SC1 | CSF20624 | <i>C. ilicicola</i>     | ABAA | L.L. Liu, J.L. Han, L.S. Sun,<br>Y Liu & X.Y. Liang | OK168038 | OK169075 | OK169178 | OK169262 |
| 32 | 20–40 cm | 20200729-1-(2)_0–40<br>cm_A_R1_SC2 | CSF20625 | <i>C. ilicicola</i>     | AB-- | L.L. Liu, J.L. Han, L.S. Sun,<br>Y Liu & X.Y. Liang | OK168039 | OK169076 | –        | –        |
| 32 | 20–40 cm | 20200729-1-(2)_0–40<br>cm_A_R1_SC3 | CSF20626 | <i>C. ilicicola</i>     | AB-- | L.L. Liu, J.L. Han, L.S. Sun,<br>Y Liu & X.Y. Liang | OK168040 | OK169077 | –        | –        |
| 32 | 20–40 cm | 20200729-1-(2)_0–40<br>cm_A_R1_SC4 | CSF20627 | <i>C. ilicicola</i>     | AB-- | L.L. Liu, J.L. Han, L.S. Sun,<br>Y Liu & X.Y. Liang | OK168041 | OK169078 | –        | –        |
| 32 | 20–40 cm | 20200729-1-(2)_0–40<br>cm_A_R2_SC1 | CSF20628 | <i>C. hongkongensis</i> | DA-- | L.L. Liu, J.L. Han, L.S. Sun,<br>Y Liu & X.Y. Liang | OK167682 | OK168719 | –        | –        |
| 32 | 20–40 cm | 20200729-1-(2)_0–40<br>cm_A_R2_SC2 | CSF20629 | <i>C. hongkongensis</i> | DA-- | L.L. Liu, J.L. Han, L.S. Sun,<br>Y Liu & X.Y. Liang | OK167683 | OK168720 | –        | –        |

|    |          |                                    |          |                         |      |                                                     |          |          |   |   |
|----|----------|------------------------------------|----------|-------------------------|------|-----------------------------------------------------|----------|----------|---|---|
| 32 | 20–40 cm | 20200729-1-(2)_0–40<br>cm_A_R2_SC3 | CSF20630 | <i>C. hongkongensis</i> | DA-- | L.L. Liu, J.L. Han, L.S. Sun,<br>Y Liu & X.Y. Liang | OK167684 | OK168721 | – | – |
| 32 | 20–40 cm | 20200729-1-(2)_0–40<br>cm_A_R2_SC4 | CSF20631 | <i>C. hongkongensis</i> | DA-- | L.L. Liu, J.L. Han, L.S. Sun,<br>Y Liu & X.Y. Liang | OK167685 | OK168722 | – | – |
| 35 | 0–20 cm  | 20200729-1-(5)_0–20<br>cm_A_R2_SC1 | CSF20632 | <i>C. hongkongensis</i> | AA-- | L.L. Liu, J.L. Han, L.S. Sun,<br>Y Liu & X.Y. Liang | OK167239 | OK168276 | – | – |
| 35 | 0–20 cm  | 20200729-1-(5)_0–20<br>cm_A_R2_SC2 | CSF20633 | <i>C. hongkongensis</i> | AA-- | L.L. Liu, J.L. Han, L.S. Sun,<br>Y Liu & X.Y. Liang | OK167240 | OK168277 | – | – |
| 35 | 0–20 cm  | 20200729-1-(5)_0–20<br>cm_B_R1_SC1 | CSF20634 | <i>C. hongkongensis</i> | AA-- | L.L. Liu, J.L. Han, L.S. Sun,<br>Y Liu & X.Y. Liang | OK167241 | OK168278 | – | – |
| 35 | 0–20 cm  | 20200729-1-(5)_0–20<br>cm_B_R1_SC2 | CSF20635 | <i>C. hongkongensis</i> | AA-- | L.L. Liu, J.L. Han, L.S. Sun,<br>Y Liu & X.Y. Liang | OK167242 | OK168279 | – | – |
| 36 | 0–20 cm  | 20200730-1-(1)_0–20<br>cm_A_R1_SC1 | CSF20636 | <i>C. hongkongensis</i> | AA-- | L.L. Liu, J.L. Han & L.S.<br>Sun                    | OK167243 | OK168280 | – | – |
| 36 | 0–20 cm  | 20200730-1-(1)_0–20<br>cm_A_R1_SC2 | CSF20637 | <i>C. hongkongensis</i> | AA-- | L.L. Liu, J.L. Han & L.S.<br>Sun                    | OK167244 | OK168281 | – | – |
| 36 | 0–20 cm  | 20200730-1-(1)_0–20<br>cm_A_R2_SC1 | CSF20638 | <i>C. aconidialis</i>   | AA-- | L.L. Liu, J.L. Han & L.S.<br>Sun                    | OK167727 | OK168764 | – | – |
| 36 | 0–20 cm  | 20200730-1-(1)_0–20<br>cm_B_R2_SC1 | CSF20640 | <i>C. hongkongensis</i> | AA-- | L.L. Liu, J.L. Han & L.S.<br>Sun                    | OK167245 | OK168282 | – | – |
| 36 | 0–20 cm  | 20200730-1-(1)_0–20<br>cm_B_R2_SC2 | CSF20641 | <i>C. hongkongensis</i> | AA-- | L.L. Liu, J.L. Han & L.S.<br>Sun                    | OK167246 | OK168283 | – | – |
| 37 | 0–20 cm  | 20200730-1-(2)_0–20<br>cm_A_R1_SC1 | CSF20642 | <i>C. aconidialis</i>   | AA-- | L.L. Liu, J.L. Han & L.S.<br>Sun                    | OK167728 | OK168765 | – | – |
| 37 | 0–20 cm  | 20200730-1-(2)_0–20<br>cm_A_R1_SC2 | CSF20643 | <i>C. aconidialis</i>   | AA-- | L.L. Liu, J.L. Han & L.S.<br>Sun                    | OK167729 | OK168766 | – | – |
| 37 | 0–20 cm  | 20200730-1-(2)_0–20<br>cm_A_R2_SC1 | CSF20644 | <i>C. aconidialis</i>   | AC-- | L.L. Liu, J.L. Han & L.S.<br>Sun                    | OK167887 | OK168924 | – | – |
| 37 | 0–20 cm  | 20200730-1-(2)_0–20<br>cm_A_R2_SC2 | CSF20645 | <i>C. aconidialis</i>   | AC-- | L.L. Liu, J.L. Han & L.S.<br>Sun                    | OK167888 | OK168925 | – | – |
| 37 | 0–20 cm  | 20200730-1-(2)_0–20<br>cm_B_R1_SC1 | CSF20646 | <i>C. aconidialis</i>   | AA-- | L.L. Liu, J.L. Han & L.S.<br>Sun                    | OK167730 | OK168767 | – | – |
| 37 | 0–20 cm  | 20200730-1-(2)_0–20<br>cm_B_R1_SC2 | CSF20647 | <i>C. aconidialis</i>   | AA-- | L.L. Liu, J.L. Han & L.S.<br>Sun                    | OK167731 | OK168768 | – | – |

|    |          |                                    |          |                         |      |                                  |          |          |   |   |
|----|----------|------------------------------------|----------|-------------------------|------|----------------------------------|----------|----------|---|---|
| 37 | 0–20 cm  | 20200730-1-(2)_0–20<br>cm_B_R2_SC1 | CSF20648 | <i>C. aconidialis</i>   | AA-- | L.L. Liu, J.L. Han & L.S.<br>Sun | OK167732 | OK168769 | – | – |
| 37 | 0–20 cm  | 20200730-1-(2)_0–20<br>cm_B_R2_SC2 | CSF20649 | <i>C. aconidialis</i>   | AA-- | L.L. Liu, J.L. Han & L.S.<br>Sun | OK167733 | OK168770 | – | – |
| 39 | 0–20 cm  | 20200730-1-(4)_0–20<br>cm_A_R1_SC1 | CSF20650 | <i>C. hongkongensis</i> | AA-- | L.L. Liu, J.L. Han & L.S.<br>Sun | OK167247 | OK168284 | – | – |
| 39 | 0–20 cm  | 20200730-1-(4)_0–20<br>cm_A_R1_SC2 | CSF20651 | <i>C. hongkongensis</i> | AA-- | L.L. Liu, J.L. Han & L.S.<br>Sun | OK167248 | OK168285 | – | – |
| 39 | 0–20 cm  | 20200730-1-(4)_0–20<br>cm_A_R2_SC1 | CSF20652 | <i>C. kyotensis</i>     | AA-- | L.L. Liu, J.L. Han & L.S.<br>Sun | OK167955 | OK168992 | – | – |
| 39 | 0–20 cm  | 20200730-1-(4)_0–20<br>cm_A_R2_SC2 | CSF20653 | <i>C. hongkongensis</i> | AA-- | L.L. Liu, J.L. Han & L.S.<br>Sun | OK167249 | OK168286 | – | – |
| 39 | 0–20 cm  | 20200730-1-(4)_0–20<br>cm_B_R1_SC1 | CSF20654 | <i>C. aconidialis</i>   | AC-- | L.L. Liu, J.L. Han & L.S.<br>Sun | OK167889 | OK168926 | – | – |
| 39 | 0–20 cm  | 20200730-1-(4)_0–20<br>cm_B_R1_SC2 | CSF20655 | <i>C. aconidialis</i>   | AC-- | L.L. Liu, J.L. Han & L.S.<br>Sun | OK167890 | OK168927 | – | – |
| 39 | 0–20 cm  | 20200730-1-(4)_0–20<br>cm_B_R2_SC1 | CSF20656 | <i>C. aconidialis</i>   | AC-- | L.L. Liu, J.L. Han & L.S.<br>Sun | OK167891 | OK168928 | – | – |
| 39 | 0–20 cm  | 20200730-1-(4)_0–20<br>cm_B_R2_SC2 | CSF20657 | <i>C. aconidialis</i>   | AC-- | L.L. Liu, J.L. Han & L.S.<br>Sun | OK167892 | OK168929 | – | – |
| 39 | 20–40 cm | 20200730-1-(4)_0–40<br>cm_B_R2_SC1 | CSF20658 | <i>C. hongkongensis</i> | AA-- | L.L. Liu, J.L. Han & L.S.<br>Sun | OK167250 | OK168287 | – | – |
| 39 | 20–40 cm | 20200730-1-(4)_0–40<br>cm_B_R2_SC3 | CSF20660 | <i>C. hongkongensis</i> | AA-- | L.L. Liu, J.L. Han & L.S.<br>Sun | OK167251 | OK168288 | – | – |
| 39 | 20–40 cm | 20200730-1-(4)_0–40<br>cm_B_R2_SC4 | CSF20661 | <i>C. hongkongensis</i> | AA-- | L.L. Liu, J.L. Han & L.S.<br>Sun | OK167252 | OK168289 | – | – |
| 39 | 20–40 cm | 20200730-1-(4)_0–40<br>cm_B_R2_SC5 | CSF20662 | <i>C. hongkongensis</i> | AA-- | L.L. Liu, J.L. Han & L.S.<br>Sun | OK167253 | OK168290 | – | – |
| 40 | 0–20 cm  | 20200730-1-(5)_0–20<br>cm_B_R1_SC1 | CSF20665 | <i>C. aconidialis</i>   | AA-- | L.L. Liu, J.L. Han & L.S.<br>Sun | OK167734 | OK168771 | – | – |
| 40 | 0–20 cm  | 20200730-1-(5)_0–20<br>cm_B_R1_SC2 | CSF20666 | <i>C. aconidialis</i>   | AA-- | L.L. Liu, J.L. Han & L.S.<br>Sun | OK167735 | OK168772 | – | – |
| 40 | 0–20 cm  | 20200730-1-(5)_0–20<br>cm_B_R2_SC1 | CSF20667 | <i>C. hongkongensis</i> | AA-- | L.L. Liu, J.L. Han & L.S.<br>Sun | OK167254 | OK168291 | – | – |

|    |         |                                    |          |                         |      |                                  |          |          |   |   |
|----|---------|------------------------------------|----------|-------------------------|------|----------------------------------|----------|----------|---|---|
| 40 | 0–20 cm | 20200730-1-(5)_0–20<br>cm_B_R2_SC2 | CSF20668 | <i>C. hongkongensis</i> | AA-- | L.L. Liu, J.L. Han & L.S.<br>Sun | OK167255 | OK168292 | – | – |
| 41 | 0–20 cm | 20200730-1-(6)_0–20<br>cm_A_R1_SC1 | CSF20669 | <i>C. hongkongensis</i> | AA-- | L.L. Liu, J.L. Han & L.S.<br>Sun | OK167256 | OK168293 | – | – |
| 41 | 0–20 cm | 20200730-1-(6)_0–20<br>cm_A_R1_SC2 | CSF20670 | <i>C. hongkongensis</i> | AA-- | L.L. Liu, J.L. Han & L.S.<br>Sun | OK167257 | OK168294 | – | – |
| 41 | 0–20 cm | 20200730-1-(6)_0–20<br>cm_A_R2_SC1 | CSF20671 | <i>C. hongkongensis</i> | AA-- | L.L. Liu, J.L. Han & L.S.<br>Sun | OK167258 | OK168295 | – | – |
| 41 | 0–20 cm | 20200730-1-(6)_0–20<br>cm_A_R2_SC2 | CSF20672 | <i>C. hongkongensis</i> | AA-- | L.L. Liu, J.L. Han & L.S.<br>Sun | OK167259 | OK168296 | – | – |
| 41 | 0–20 cm | 20200730-1-(6)_0–20<br>cm_B_R1_SC1 | CSF20673 | <i>C. hongkongensis</i> | AA-- | L.L. Liu, J.L. Han & L.S.<br>Sun | OK167260 | OK168297 | – | – |
| 41 | 0–20 cm | 20200730-1-(6)_0–20<br>cm_B_R1_SC2 | CSF20674 | <i>C. hongkongensis</i> | AA-- | L.L. Liu, J.L. Han & L.S.<br>Sun | OK167261 | OK168298 | – | – |
| 42 | 0–20 cm | 20200730-1-(7)_0–20<br>cm_A_R1_SC1 | CSF20675 | <i>C. hongkongensis</i> | AA-- | L.L. Liu, J.L. Han & L.S.<br>Sun | OK167262 | OK168299 | – | – |
| 42 | 0–20 cm | 20200730-1-(7)_0–20<br>cm_A_R1_SC2 | CSF20676 | <i>C. hongkongensis</i> | AA-- | L.L. Liu, J.L. Han & L.S.<br>Sun | OK167263 | OK168300 | – | – |
| 42 | 0–20 cm | 20200730-1-(7)_0–20<br>cm_A_R2_SC1 | CSF20677 | <i>C. hongkongensis</i> | AA-- | L.L. Liu, J.L. Han & L.S.<br>Sun | OK167264 | OK168301 | – | – |
| 42 | 0–20 cm | 20200730-1-(7)_0–20<br>cm_A_R2_SC2 | CSF20678 | <i>C. hongkongensis</i> | AG-- | L.L. Liu, J.L. Han & L.S.<br>Sun | OK167636 | OK168673 | – | – |
| 42 | 0–20 cm | 20200730-1-(7)_0–20<br>cm_B_R1_SC1 | CSF20679 | <i>C. hongkongensis</i> | AA-- | L.L. Liu, J.L. Han & L.S.<br>Sun | OK167265 | OK168302 | – | – |
| 42 | 0–20 cm | 20200730-1-(7)_0–20<br>cm_B_R1_SC2 | CSF20680 | <i>C. hongkongensis</i> | AG-- | L.L. Liu, J.L. Han & L.S.<br>Sun | OK167637 | OK168674 | – | – |
| 42 | 0–20 cm | 20200730-1-(7)_0–20<br>cm_B_R2_SC1 | CSF20681 | <i>C. hongkongensis</i> | AG-- | L.L. Liu, J.L. Han & L.S.<br>Sun | OK167638 | OK168675 | – | – |
| 42 | 0–20 cm | 20200730-1-(7)_0–20<br>cm_B_R2_SC2 | CSF20682 | <i>C. hongkongensis</i> | AG-- | L.L. Liu, J.L. Han & L.S.<br>Sun | OK167639 | OK168676 | – | – |
| 43 | 0–20 cm | 20200730-1-(8)_0–20<br>cm_A_R1_SC1 | CSF20683 | <i>C. hongkongensis</i> | AG-- | L.L. Liu, J.L. Han & L.S.<br>Sun | OK167640 | OK168677 | – | – |
| 43 | 0–20 cm | 20200730-1-(8)_0–20<br>cm_A_R1_SC2 | CSF20684 | <i>C. hongkongensis</i> | AG-- | L.L. Liu, J.L. Han & L.S.<br>Sun | OK167641 | OK168678 | – | – |



|    |         |                                    |          |                         |      |                                  |          |          |   |   |
|----|---------|------------------------------------|----------|-------------------------|------|----------------------------------|----------|----------|---|---|
| 43 | 0–20 cm | 20200730-1-(8)_0–20<br>cm_A_R2_SC1 | CSF20685 | <i>C. hongkongensis</i> | AA-- | L.L. Liu, J.L. Han & L.S.<br>Sun | OK167266 | OK168303 | – | – |
| 43 | 0–20 cm | 20200730-1-(8)_0–20<br>cm_A_R2_SC2 | CSF20686 | <i>C. hongkongensis</i> | AA-- | L.L. Liu, J.L. Han & L.S.<br>Sun | OK167267 | OK168304 | – | – |
| 43 | 0–20 cm | 20200730-1-(8)_0–20<br>cm_B_R1_SC1 | CSF20687 | <i>C. hongkongensis</i> | AA-- | L.L. Liu, J.L. Han & L.S.<br>Sun | OK167268 | OK168305 | – | – |
| 43 | 0–20 cm | 20200730-1-(8)_0–20<br>cm_B_R1_SC2 | CSF20688 | <i>C. hongkongensis</i> | AA-- | L.L. Liu, J.L. Han & L.S.<br>Sun | OK167269 | OK168306 | – | – |
| 43 | 0–20 cm | 20200730-1-(8)_0–20<br>cm_B_R2_SC1 | CSF20689 | <i>C. hongkongensis</i> | AA-- | L.L. Liu, J.L. Han & L.S.<br>Sun | OK167270 | OK168307 | – | – |
| 43 | 0–20 cm | 20200730-1-(8)_0–20<br>cm_B_R2_SC2 | CSF20690 | <i>C. hongkongensis</i> | AA-- | L.L. Liu, J.L. Han & L.S.<br>Sun | OK167271 | OK168308 | – | – |
| 44 | 0–20 cm | 20200731-1-(1)_0–20<br>cm_A_R1_SC1 | CSF20691 | <i>C. hongkongensis</i> | AA-- | L.L. Liu, J.L. Han & L.S.<br>Sun | OK167272 | OK168309 | – | – |
| 44 | 0–20 cm | 20200731-1-(1)_0–20<br>cm_A_R1_SC2 | CSF20692 | <i>C. hongkongensis</i> | AA-- | L.L. Liu, J.L. Han & L.S.<br>Sun | OK167273 | OK168310 | – | – |
| 44 | 0–20 cm | 20200731-1-(1)_0–20<br>cm_A_R2_SC1 | CSF20693 | <i>C. hongkongensis</i> | AA-- | L.L. Liu, J.L. Han & L.S.<br>Sun | OK167274 | OK168311 | – | – |
| 44 | 0–20 cm | 20200731-1-(1)_0–20<br>cm_A_R2_SC2 | CSF20694 | <i>C. hongkongensis</i> | AA-- | L.L. Liu, J.L. Han & L.S.<br>Sun | OK167275 | OK168312 | – | – |
| 44 | 0–20 cm | 20200731-1-(1)_0–20<br>cm_B_R1_SC1 | CSF20695 | <i>C. hongkongensis</i> | AA-- | L.L. Liu, J.L. Han & L.S.<br>Sun | OK167276 | OK168313 | – | – |
| 44 | 0–20 cm | 20200731-1-(1)_0–20<br>cm_B_R1_SC2 | CSF20696 | <i>C. hongkongensis</i> | AA-- | L.L. Liu, J.L. Han & L.S.<br>Sun | OK167277 | OK168314 | – | – |
| 44 | 0–20 cm | 20200731-1-(1)_0–20<br>cm_B_R2_SC1 | CSF20697 | <i>C. hongkongensis</i> | AA-- | L.L. Liu, J.L. Han & L.S.<br>Sun | OK167278 | OK168315 | – | – |
| 44 | 0–20 cm | 20200731-1-(1)_0–20<br>cm_B_R2_SC2 | CSF20698 | <i>C. hongkongensis</i> | AA-- | L.L. Liu, J.L. Han & L.S.<br>Sun | OK167279 | OK168316 | – | – |
| 45 | 0–20 cm | 20200731-1-(2)_0–20<br>cm_A_R1_SC1 | CSF20699 | <i>C. aconidialis</i>   | AA-- | L.L. Liu, J.L. Han & L.S.<br>Sun | OK167736 | OK168773 | – | – |
| 45 | 0–20 cm | 20200731-1-(2)_0–20<br>cm_A_R1_SC2 | CSF20700 | <i>C. aconidialis</i>   | AA-- | L.L. Liu, J.L. Han & L.S.<br>Sun | OK167737 | OK168774 | – | – |
| 45 | 0–20 cm | 20200731-1-(2)_0–20<br>cm_A_R2_SC1 | CSF20701 | <i>C. aconidialis</i>   | AA-- | L.L. Liu, J.L. Han & L.S.<br>Sun | OK167738 | OK168775 | – | – |

|    |          |                                    |          |                         |      |                                  |          |          |          |          |
|----|----------|------------------------------------|----------|-------------------------|------|----------------------------------|----------|----------|----------|----------|
| 45 | 0–20 cm  | 20200731-1-(2)_0–20<br>cm_A_R2_SC2 | CSF20702 | <i>C. hongkongensis</i> | AA-- | L.L. Liu, J.L. Han & L.S.<br>Sun | OK167280 | OK168317 | –        | –        |
| 45 | 0–20 cm  | 20200731-1-(2)_0–20<br>cm_B_R1_SC1 | CSF20703 | <i>C. ilicicola</i>     | ABAA | L.L. Liu, J.L. Han & L.S.<br>Sun | OK168042 | OK169079 | OK169179 | OK169263 |
| 45 | 0–20 cm  | 20200731-1-(2)_0–20<br>cm_B_R1_SC2 | CSF20704 | <i>C. hongkongensis</i> | AA-- | L.L. Liu, J.L. Han & L.S.<br>Sun | OK167281 | OK168318 | –        | –        |
| 45 | 0–20 cm  | 20200731-1-(2)_0–20<br>cm_B_R2_SC1 | CSF20705 | <i>C. aconidialis</i>   | AA-- | L.L. Liu, J.L. Han & L.S.<br>Sun | OK167739 | OK168776 | –        | –        |
| 46 | 0–20 cm  | 20200731-1-(3)_0–20<br>cm_A_R1_SC1 | CSF20707 | <i>C. hongkongensis</i> | AA-- | L.L. Liu, J.L. Han & L.S.<br>Sun | OK167282 | OK168319 | –        | –        |
| 46 | 0–20 cm  | 20200731-1-(3)_0–20<br>cm_A_R1_SC2 | CSF20708 | <i>C. hongkongensis</i> | AA-- | L.L. Liu, J.L. Han & L.S.<br>Sun | OK167283 | OK168320 | –        | –        |
| 46 | 0–20 cm  | 20200731-1-(3)_0–20<br>cm_B_R1_SC1 | CSF20709 | <i>C. hongkongensis</i> | AA-- | L.L. Liu, J.L. Han & L.S.<br>Sun | OK167284 | OK168321 | –        | –        |
| 46 | 0–20 cm  | 20200731-1-(3)_0–20<br>cm_B_R1_SC2 | CSF20710 | <i>C. hongkongensis</i> | AA-- | L.L. Liu, J.L. Han & L.S.<br>Sun | OK167285 | OK168322 | –        | –        |
| 46 | 0–20 cm  | 20200731-1-(3)_0–20<br>cm_B_R2_SC1 | CSF20711 | <i>C. hongkongensis</i> | AG-- | L.L. Liu, J.L. Han & L.S.<br>Sun | OK167642 | OK168679 | –        | –        |
| 46 | 0–20 cm  | 20200731-1-(3)_0–20<br>cm_B_R2_SC2 | CSF20712 | <i>C. hongkongensis</i> | AG-- | L.L. Liu, J.L. Han & L.S.<br>Sun | OK167643 | OK168680 | –        | –        |
| 47 | 0–20 cm  | 20200731-1-(4)_0–20<br>cm_A_R2_SC1 | CSF20713 | <i>C. aconidialis</i>   | AA-- | L.L. Liu, J.L. Han & L.S.<br>Sun | OK167740 | OK168777 | –        | –        |
| 47 | 0–20 cm  | 20200731-1-(4)_0–20<br>cm_A_R2_SC2 | CSF20714 | <i>C. aconidialis</i>   | AA-- | L.L. Liu, J.L. Han & L.S.<br>Sun | OK167741 | OK168778 | –        | –        |
| 47 | 0–20 cm  | 20200731-1-(4)_0–20<br>cm_B_R1_SC1 | CSF20715 | <i>C. aconidialis</i>   | AA-- | L.L. Liu, J.L. Han & L.S.<br>Sun | OK167742 | OK168779 | –        | –        |
| 47 | 0–20 cm  | 20200731-1-(4)_0–20<br>cm_B_R1_SC2 | CSF20716 | <i>C. aconidialis</i>   | AA-- | L.L. Liu, J.L. Han & L.S.<br>Sun | OK167743 | OK168780 | –        | –        |
| 47 | 20–40 cm | 20200731-1-(4)_0–40<br>cm_A_R2_SC1 | CSF20717 | <i>C. aconidialis</i>   | AA-- | L.L. Liu, J.L. Han & L.S.<br>Sun | OK167744 | OK168781 | –        | –        |
| 47 | 20–40 cm | 20200731-1-(4)_0–40<br>cm_A_R2_SC2 | CSF20718 | <i>C. aconidialis</i>   | AA-- | L.L. Liu, J.L. Han & L.S.<br>Sun | OK167745 | OK168782 | –        | –        |
| 47 | 20–40 cm | 20200731-1-(4)_0–40<br>cm_A_R2_SC3 | CSF20719 | <i>C. aconidialis</i>   | AA-- | L.L. Liu, J.L. Han & L.S.<br>Sun | OK167746 | OK168783 | –        | –        |

|    |          |                                    |          |                         |      |                                  |          |          |          |          |
|----|----------|------------------------------------|----------|-------------------------|------|----------------------------------|----------|----------|----------|----------|
| 47 | 20–40 cm | 20200731-1-(4)_0–40<br>cm_A_R2_SC4 | CSF20720 | <i>C. aconidialis</i>   | AA-- | L.L. Liu, J.L. Han & L.S.<br>Sun | OK167747 | OK168784 | –        | –        |
| 48 | 0–20 cm  | 20200731-1-(5)_0–20<br>cm_A_R2_SC1 | CSF20721 | <i>C. aconidialis</i>   | AA-- | L.L. Liu, J.L. Han & L.S.<br>Sun | OK167748 | OK168785 | –        | –        |
| 48 | 0–20 cm  | 20200731-1-(5)_0–20<br>cm_A_R2_SC2 | CSF20722 | <i>C. aconidialis</i>   | AA-- | L.L. Liu, J.L. Han & L.S.<br>Sun | OK167749 | OK168786 | –        | –        |
| 48 | 0–20 cm  | 20200731-1-(5)_0–20<br>cm_B_R2_SC1 | CSF20723 | <i>C. aconidialis</i>   | AA-- | L.L. Liu, J.L. Han & L.S.<br>Sun | OK167750 | OK168787 | –        | –        |
| 48 | 0–20 cm  | 20200731-1-(5)_0–20<br>cm_B_R2_SC2 | CSF20724 | <i>C. aconidialis</i>   | AA-- | L.L. Liu, J.L. Han & L.S.<br>Sun | OK167751 | OK168788 | –        | –        |
| 49 | 0–20 cm  | 20200731-1-(6)_0–20<br>cm_A_R1_SC1 | CSF20725 | <i>C. hongkongensis</i> | DA-- | L.L. Liu, J.L. Han & L.S.<br>Sun | OK167686 | OK168723 | –        | –        |
| 49 | 0–20 cm  | 20200731-1-(6)_0–20<br>cm_A_R1_SC2 | CSF20726 | <i>C. hongkongensis</i> | DA-- | L.L. Liu, J.L. Han & L.S.<br>Sun | OK167687 | OK168724 | –        | –        |
| 49 | 0–20 cm  | 20200731-1-(6)_0–20<br>cm_B_R2_SC1 | CSF20727 | <i>C. aconidialis</i>   | AA-- | L.L. Liu, J.L. Han & L.S.<br>Sun | OK167752 | OK168789 | –        | –        |
| 50 | 0–20 cm  | 20200731-1-(7)_0–20<br>cm_A_R1_SC1 | CSF20729 | <i>C. hongkongensis</i> | AA-- | L.L. Liu, J.L. Han & L.S.<br>Sun | OK167286 | OK168323 | –        | –        |
| 50 | 0–20 cm  | 20200731-1-(7)_0–20<br>cm_B_R1_SC1 | CSF20730 | <i>C. hongkongensis</i> | AA-- | L.L. Liu, J.L. Han & L.S.<br>Sun | OK167287 | OK168324 | –        | –        |
| 50 | 0–20 cm  | 20200731-1-(7)_0–20<br>cm_B_R1_SC2 | CSF20731 | <i>C. hongkongensis</i> | AA-- | L.L. Liu, J.L. Han & L.S.<br>Sun | OK167288 | OK168325 | –        | –        |
| 50 | 0–20 cm  | 20200731-1-(7)_0–20<br>cm_B_R2_SC1 | CSF20732 | <i>C. hongkongensis</i> | AA-- | L.L. Liu, J.L. Han & L.S.<br>Sun | OK167289 | OK168326 | –        | –        |
| 50 | 0–20 cm  | 20200731-1-(7)_0–20<br>cm_B_R2_SC2 | CSF20733 | <i>C. hongkongensis</i> | AA-- | L.L. Liu, J.L. Han & L.S.<br>Sun | OK167290 | OK168327 | –        | –        |
| 51 | 0–20 cm  | 20200809-1-(1)_0–20<br>cm_A_R1_SC1 | CSF20734 | <i>C. hongkongensis</i> | BAAA | L.L. Liu, J.L. Han & L.S.<br>Sun | OK167652 | OK168689 | OK169137 | OK169221 |
| 51 | 0–20 cm  | 20200809-1-(1)_0–20<br>cm_A_R1_SC2 | CSF20735 | <i>C. hongkongensis</i> | BA-- | L.L. Liu, J.L. Han & L.S.<br>Sun | OK167653 | OK168690 | –        | –        |
| 51 | 0–20 cm  | 20200809-1-(1)_0–20<br>cm_A_R2_SC1 | CSF20736 | <i>C. hongkongensis</i> | AA-- | L.L. Liu, J.L. Han & L.S.<br>Sun | OK167291 | OK168328 | –        | –        |
| 51 | 0–20 cm  | 20200809-1-(1)_0–20<br>cm_A_R2_SC2 | CSF20737 | <i>C. hongkongensis</i> | BA-- | L.L. Liu, J.L. Han & L.S.<br>Sun | OK167654 | OK168691 | –        | –        |

|    |          |                                    |          |                         |      |                                  |          |          |          |          |
|----|----------|------------------------------------|----------|-------------------------|------|----------------------------------|----------|----------|----------|----------|
| 51 | 0–20 cm  | 20200809-1-(1)_0–20<br>cm_B_R1_SC1 | CSF20738 | <i>C. hongkongensis</i> | BA-- | L.L. Liu, J.L. Han & L.S.<br>Sun | OK167655 | OK168692 | –        | –        |
| 51 | 0–20 cm  | 20200809-1-(1)_0–20<br>cm_B_R1_SC2 | CSF20739 | <i>C. hongkongensis</i> | AA-- | L.L. Liu, J.L. Han & L.S.<br>Sun | OK167292 | OK168329 | –        | –        |
| 51 | 0–20 cm  | 20200809-1-(1)_0–20<br>cm_B_R2_SC1 | CSF20740 | <i>C. hongkongensis</i> | BA-- | L.L. Liu, J.L. Han & L.S.<br>Sun | OK167656 | OK168693 | –        | –        |
| 51 | 0–20 cm  | 20200809-1-(1)_0–20<br>cm_B_R2_SC2 | CSF20741 | <i>C. hongkongensis</i> | AA-- | L.L. Liu, J.L. Han & L.S.<br>Sun | OK167293 | OK168330 | –        | –        |
| 51 | 20–40 cm | 20200809-1-(1)_0–40<br>cm_A_R1_SC1 | CSF20742 | <i>C. aconidialis</i>   | AA-- | L.L. Liu, J.L. Han & L.S.<br>Sun | OK167753 | OK168790 | –        | –        |
| 51 | 20–40 cm | 20200809-1-(1)_0–40<br>cm_A_R1_SC2 | CSF20743 | <i>C. aconidialis</i>   | AA-- | L.L. Liu, J.L. Han & L.S.<br>Sun | OK167754 | OK168791 | –        | –        |
| 51 | 20–40 cm | 20200809-1-(1)_0–40<br>cm_A_R1_SC4 | CSF20745 | <i>C. aconidialis</i>   | AA-- | L.L. Liu, J.L. Han & L.S.<br>Sun | OK167755 | OK168792 | –        | –        |
| 51 | 20–40 cm | 20200809-1-(1)_0–40<br>cm_A_R1_SC5 | CSF20746 | <i>C. aconidialis</i>   | AA-- | L.L. Liu, J.L. Han & L.S.<br>Sun | OK167756 | OK168793 | –        | –        |
| 51 | 20–40 cm | 20200809-1-(1)_0–40<br>cm_A_R2_SC1 | CSF20750 | <i>C. aconidialis</i>   | AA-- | L.L. Liu, J.L. Han & L.S.<br>Sun | OK167757 | OK168794 | –        | –        |
| 51 | 20–40 cm | 20200809-1-(1)_0–40<br>cm_A_R2_SC2 | CSF20751 | <i>C. aconidialis</i>   | AA-- | L.L. Liu, J.L. Han & L.S.<br>Sun | OK167758 | OK168795 | –        | –        |
| 51 | 20–40 cm | 20200809-1-(1)_0–40<br>cm_A_R2_SC3 | CSF20752 | <i>C. aconidialis</i>   | AA-- | L.L. Liu, J.L. Han & L.S.<br>Sun | OK167759 | OK168796 | –        | –        |
| 51 | 20–40 cm | 20200809-1-(1)_0–40<br>cm_A_R2_SC4 | CSF20753 | <i>C. aconidialis</i>   | AA-- | L.L. Liu, J.L. Han & L.S.<br>Sun | OK167760 | OK168797 | –        | –        |
| 52 | 0–20 cm  | 20200809-1-(2)_0–20<br>cm_A_R1_SC1 | CSF20754 | <i>C. hongkongensis</i> | AA-- | L.L. Liu, J.L. Han & L.S.<br>Sun | OK167294 | OK168331 | –        | –        |
| 52 | 0–20 cm  | 20200809-1-(2)_0–20<br>cm_A_R1_SC2 | CSF20755 | <i>C. hongkongensis</i> | AA-- | L.L. Liu, J.L. Han & L.S.<br>Sun | OK167295 | OK168332 | –        | –        |
| 52 | 0–20 cm  | 20200809-1-(2)_0–20<br>cm_A_R2_SC1 | CSF20756 | <i>C. chinensis</i>     | AAAA | L.L. Liu, J.L. Han & L.S.<br>Sun | OK168055 | OK169092 | OK169184 | OK169268 |
| 52 | 0–20 cm  | 20200809-1-(2)_0–20<br>cm_A_R2_SC2 | CSF20757 | <i>C. hongkongensis</i> | AA-- | L.L. Liu, J.L. Han & L.S.<br>Sun | OK167296 | OK168333 | –        | –        |
| 52 | 0–20 cm  | 20200809-1-(2)_0–20<br>cm_A_R2_SC3 | CSF20758 | <i>C. hongkongensis</i> | ABA- | L.L. Liu, J.L. Han & L.S.<br>Sun | OK167596 | OK168633 | OK169113 | –        |

|    |         |                                    |          |                         |      |                                  |          |          |          |          |
|----|---------|------------------------------------|----------|-------------------------|------|----------------------------------|----------|----------|----------|----------|
| 52 | 0–20 cm | 20200809-1-(2)_0–20<br>cm_A_R2_SC4 | CSF20759 | <i>C. chinensis</i>     | AAAA | L.L. Liu, J.L. Han & L.S.<br>Sun | OK168056 | OK169093 | OK169185 | OK169269 |
| 52 | 0–20 cm | 20200809-1-(2)_0–20<br>cm_B_R1_SC1 | CSF20760 | <i>C. hongkongensis</i> | AHAA | L.L. Liu, J.L. Han & L.S.<br>Sun | OK167645 | OK168682 | OK169132 | OK169216 |
| 52 | 0–20 cm | 20200809-1-(2)_0–20<br>cm_B_R1_SC2 | CSF20761 | <i>C. hongkongensis</i> | AHAA | L.L. Liu, J.L. Han & L.S.<br>Sun | OK167646 | OK168683 | OK169133 | OK169217 |
| 52 | 0–20 cm | 20200809-1-(2)_0–20<br>cm_B_R2_SC1 | CSF20762 | <i>C. hongkongensis</i> | AA-- | L.L. Liu, J.L. Han & L.S.<br>Sun | OK167297 | OK168334 | –        | –        |
| 52 | 0–20 cm | 20200809-1-(2)_0–20<br>cm_B_R2_SC2 | CSF20763 | <i>C. hongkongensis</i> | AA-- | L.L. Liu, J.L. Han & L.S.<br>Sun | OK167298 | OK168335 | –        | –        |
| 53 | 0–20 cm | 20200809-1-(3)_0–20<br>cm_A_R1_SC2 | CSF20765 | <i>C. hongkongensis</i> | AA-- | L.L. Liu, J.L. Han & L.S.<br>Sun | OK167299 | OK168336 | –        | –        |
| 53 | 0–20 cm | 20200809-1-(3)_0–20<br>cm_A_R1_SC3 | CSF20766 | <i>C. hongkongensis</i> | AA-- | L.L. Liu, J.L. Han & L.S.<br>Sun | OK167300 | OK168337 | –        | –        |
| 53 | 0–20 cm | 20200809-1-(3)_0–20<br>cm_A_R1_SC4 | CSF20767 | <i>C. hongkongensis</i> | AA-- | L.L. Liu, J.L. Han & L.S.<br>Sun | OK167301 | OK168338 | –        | –        |
| 53 | 0–20 cm | 20200809-1-(3)_0–20<br>cm_A_R2_SC1 | CSF20768 | <i>C. kyotensis</i>     | AB-- | L.L. Liu, J.L. Han & L.S.<br>Sun | OK167991 | OK169028 | –        | –        |
| 53 | 0–20 cm | 20200809-1-(3)_0–20<br>cm_A_R2_SC2 | CSF20769 | <i>C. kyotensis</i>     | AB-- | L.L. Liu, J.L. Han & L.S.<br>Sun | OK167992 | OK169029 | –        | –        |
| 53 | 0–20 cm | 20200809-1-(3)_0–20<br>cm_B_R1_SC1 | CSF20770 | <i>C. hongkongensis</i> | AA-- | L.L. Liu, J.L. Han & L.S.<br>Sun | OK167302 | OK168339 | –        | –        |
| 53 | 0–20 cm | 20200809-1-(3)_0–20<br>cm_B_R1_SC2 | CSF20771 | <i>C. hongkongensis</i> | AA-- | L.L. Liu, J.L. Han & L.S.<br>Sun | OK167303 | OK168340 | –        | –        |
| 53 | 0–20 cm | 20200809-1-(3)_0–20<br>cm_B_R2_SC1 | CSF20772 | <i>C. hongkongensis</i> | AA-- | L.L. Liu, J.L. Han & L.S.<br>Sun | OK167304 | OK168341 | –        | –        |
| 53 | 0–20 cm | 20200809-1-(3)_0–20<br>cm_B_R2_SC2 | CSF20773 | <i>C. hongkongensis</i> | AA-- | L.L. Liu, J.L. Han & L.S.<br>Sun | OK167305 | OK168342 | –        | –        |
| 54 | 0–20 cm | 20200809-1-(4)_0–20<br>cm_B_R2_SC1 | CSF20774 | <i>C. kyotensis</i>     | AA-- | L.L. Liu, J.L. Han & L.S.<br>Sun | OK167956 | OK168993 | –        | –        |
| 54 | 0–20 cm | 20200809-1-(4)_0–20<br>cm_B_R2_SC2 | CSF20775 | <i>C. kyotensis</i>     | AA-- | L.L. Liu, J.L. Han & L.S.<br>Sun | OK167957 | OK168994 | –        | –        |
| 55 | 0–20 cm | 20200809-1-(5)_0–20<br>cm_A_R1_SC1 | CSF20776 | <i>C. hongkongensis</i> | AA-- | L.L. Liu, J.L. Han & L.S.<br>Sun | OK167306 | OK168343 | –        | –        |

|    |          |                                    |          |                         |      |                                  |          |          |   |   |
|----|----------|------------------------------------|----------|-------------------------|------|----------------------------------|----------|----------|---|---|
| 55 | 0–20 cm  | 20200809-1-(5)_0–20<br>cm_A_R1_SC2 | CSF20777 | <i>C. hongkongensis</i> | AA-- | L.L. Liu, J.L. Han & L.S.<br>Sun | OK167307 | OK168344 | – | – |
| 55 | 0–20 cm  | 20200809-1-(5)_0–20<br>cm_B_R1_SC2 | CSF20779 | <i>C. hongkongensis</i> | AA-- | L.L. Liu, J.L. Han & L.S.<br>Sun | OK167308 | OK168345 | – | – |
| 55 | 0–20 cm  | 20200809-1-(5)_0–20<br>cm_B_R2_SC1 | CSF20780 | <i>C. aconidialis</i>   | AC-- | L.L. Liu, J.L. Han & L.S.<br>Sun | OK167893 | OK168930 | – | – |
| 55 | 40–60 cm | 20200809-1-(5)_0–60<br>cm_B_R2_SC1 | CSF20782 | <i>C. hongkongensis</i> | AF-- | L.L. Liu, J.L. Han & L.S.<br>Sun | OK167618 | OK168655 | – | – |
| 55 | 40–60 cm | 20200809-1-(5)_0–60<br>cm_B_R2_SC2 | CSF20783 | <i>C. hongkongensis</i> | AF-- | L.L. Liu, J.L. Han & L.S.<br>Sun | OK167619 | OK168656 | – | – |
| 55 | 40–60 cm | 20200809-1-(5)_0–60<br>cm_B_R2_SC3 | CSF20784 | <i>C. hongkongensis</i> | AF-- | L.L. Liu, J.L. Han & L.S.<br>Sun | OK167620 | OK168657 | – | – |
| 55 | 40–60 cm | 20200809-1-(5)_0–60<br>cm_B_R2_SC4 | CSF20785 | <i>C. hongkongensis</i> | AF-- | L.L. Liu, J.L. Han & L.S.<br>Sun | OK167621 | OK168658 | – | – |
| 56 | 0–20 cm  | 20200809-1-(6)_0–20<br>cm_A_R2_SC1 | CSF20788 | <i>C. hongkongensis</i> | AA-- | L.L. Liu, J.L. Han & L.S.<br>Sun | OK167309 | OK168346 | – | – |
| 56 | 0–20 cm  | 20200809-1-(6)_0–20<br>cm_A_R2_SC2 | CSF20789 | <i>C. hongkongensis</i> | AA-- | L.L. Liu, J.L. Han & L.S.<br>Sun | OK167310 | OK168347 | – | – |
| 56 | 0–20 cm  | 20200809-1-(6)_0–20<br>cm_B_R1_SC1 | CSF20790 | <i>C. hongkongensis</i> | AA-- | L.L. Liu, J.L. Han & L.S.<br>Sun | OK167311 | OK168348 | – | – |
| 56 | 0–20 cm  | 20200809-1-(6)_0–20<br>cm_B_R2_SC1 | CSF20792 | <i>C. hongkongensis</i> | AA-- | L.L. Liu, J.L. Han & L.S.<br>Sun | OK167312 | OK168349 | – | – |
| 56 | 0–20 cm  | 20200809-1-(6)_0–20<br>cm_B_R2_SC2 | CSF20793 | <i>C. hongkongensis</i> | AA-- | L.L. Liu, J.L. Han & L.S.<br>Sun | OK167313 | OK168350 | – | – |
| 57 | 0–20 cm  | 20200810-1-(1)_0–20<br>cm_A_R1_SC1 | CSF20794 | <i>C. aconidialis</i>   | AA-- | L.L. Liu, J.L. Han & L.S.<br>Sun | OK167761 | OK168798 | – | – |
| 57 | 0–20 cm  | 20200810-1-(1)_0–20<br>cm_A_R1_SC2 | CSF20795 | <i>C. aconidialis</i>   | AA-- | L.L. Liu, J.L. Han & L.S.<br>Sun | OK167762 | OK168799 | – | – |
| 57 | 0–20 cm  | 20200810-1-(1)_0–20<br>cm_A_R2_SC1 | CSF20796 | <i>C. aconidialis</i>   | AA-- | L.L. Liu, J.L. Han & L.S.<br>Sun | OK167763 | OK168800 | – | – |
| 57 | 0–20 cm  | 20200810-1-(1)_0–20<br>cm_A_R2_SC2 | CSF20797 | <i>C. hongkongensis</i> | DA-- | L.L. Liu, J.L. Han & L.S.<br>Sun | OK167688 | OK168725 | – | – |
| 57 | 0–20 cm  | 20200810-1-(1)_0–20<br>cm_B_R1_SC1 | CSF20798 | <i>C. hongkongensis</i> | AA-- | L.L. Liu, J.L. Han & L.S.<br>Sun | OK167314 | OK168351 | – | – |

|    |          |                                    |          |                         |      |                                  |          |          |   |   |
|----|----------|------------------------------------|----------|-------------------------|------|----------------------------------|----------|----------|---|---|
| 57 | 0–20 cm  | 20200810-1-(1)_0–20<br>cm_B_R1_SC2 | CSF20799 | <i>C. hongkongensis</i> | AA-- | L.L. Liu, J.L. Han & L.S.<br>Sun | OK167315 | OK168352 | – | – |
| 58 | 0–20 cm  | 20200810-1-(2)_0–20<br>cm_A_R1_SC1 | CSF20800 | <i>C. hongkongensis</i> | AA-- | L.L. Liu, J.L. Han & L.S.<br>Sun | OK167316 | OK168353 | – | – |
| 58 | 0–20 cm  | 20200810-1-(2)_0–20<br>cm_A_R1_SC2 | CSF20801 | <i>C. hongkongensis</i> | AA-- | L.L. Liu, J.L. Han & L.S.<br>Sun | OK167317 | OK168354 | – | – |
| 58 | 0–20 cm  | 20200810-1-(2)_0–20<br>cm_A_R2_SC1 | CSF20802 | <i>C. hongkongensis</i> | AA-- | L.L. Liu, J.L. Han & L.S.<br>Sun | OK167318 | OK168355 | – | – |
| 58 | 0–20 cm  | 20200810-1-(2)_0–20<br>cm_A_R2_SC2 | CSF20803 | <i>C. hongkongensis</i> | AA-- | L.L. Liu, J.L. Han & L.S.<br>Sun | OK167319 | OK168356 | – | – |
| 58 | 0–20 cm  | 20200810-1-(2)_0–20<br>cm_B_R1_SC1 | CSF20804 | <i>C. hongkongensis</i> | AA-- | L.L. Liu, J.L. Han & L.S.<br>Sun | OK167320 | OK168357 | – | – |
| 58 | 0–20 cm  | 20200810-1-(2)_0–20<br>cm_B_R1_SC2 | CSF20805 | <i>C. hongkongensis</i> | AA-- | L.L. Liu, J.L. Han & L.S.<br>Sun | OK167321 | OK168358 | – | – |
| 58 | 0–20 cm  | 20200810-1-(2)_0–20<br>cm_B_R2_SC1 | CSF20806 | <i>C. hongkongensis</i> | AA-- | L.L. Liu, J.L. Han & L.S.<br>Sun | OK167322 | OK168359 | – | – |
| 58 | 0–20 cm  | 20200810-1-(2)_0–20<br>cm_B_R2_SC2 | CSF20807 | <i>C. hongkongensis</i> | AA-- | L.L. Liu, J.L. Han & L.S.<br>Sun | OK167323 | OK168360 | – | – |
| 58 | 20–40 cm | 20200810-1-(2)_0–40<br>cm_A_R1_SC1 | CSF20808 | <i>C. hongkongensis</i> | AA-- | L.L. Liu, J.L. Han & L.S.<br>Sun | OK167324 | OK168361 | – | – |
| 58 | 20–40 cm | 20200810-1-(2)_0–40<br>cm_A_R1_SC2 | CSF20809 | <i>C. hongkongensis</i> | AA-- | L.L. Liu, J.L. Han & L.S.<br>Sun | OK167325 | OK168362 | – | – |
| 58 | 20–40 cm | 20200810-1-(2)_0–40<br>cm_A_R1_SC3 | CSF20810 | <i>C. hongkongensis</i> | AA-- | L.L. Liu, J.L. Han & L.S.<br>Sun | OK167326 | OK168363 | – | – |
| 58 | 20–40 cm | 20200810-1-(2)_0–40<br>cm_A_R1_SC4 | CSF20811 | <i>C. hongkongensis</i> | AA-- | L.L. Liu, J.L. Han & L.S.<br>Sun | OK167327 | OK168364 | – | – |
| 58 | 20–40 cm | 20200810-1-(2)_0–40<br>cm_A_R2_SC1 | CSF20812 | <i>C. hongkongensis</i> | AA-- | L.L. Liu, J.L. Han & L.S.<br>Sun | OK167328 | OK168365 | – | – |
| 58 | 20–40 cm | 20200810-1-(2)_0–40<br>cm_A_R2_SC2 | CSF20813 | <i>C. hongkongensis</i> | AA-- | L.L. Liu, J.L. Han & L.S.<br>Sun | OK167329 | OK168366 | – | – |
| 58 | 20–40 cm | 20200810-1-(2)_0–40<br>cm_A_R2_SC3 | CSF20814 | <i>C. hongkongensis</i> | AA-- | L.L. Liu, J.L. Han & L.S.<br>Sun | OK167330 | OK168367 | – | – |
| 58 | 20–40 cm | 20200810-1-(2)_0–40<br>cm_A_R2_SC4 | CSF20815 | <i>C. hongkongensis</i> | AA-- | L.L. Liu, J.L. Han & L.S.<br>Sun | OK167331 | OK168368 | – | – |

|    |          |                                    |          |                         |      |                                  |          |          |          |          |
|----|----------|------------------------------------|----------|-------------------------|------|----------------------------------|----------|----------|----------|----------|
| 59 | 0–20 cm  | 20200810-1-(3)_0–20<br>cm_A_R1_SC1 | CSF20816 | <i>C. hongkongensis</i> | AA-- | L.L. Liu, J.L. Han & L.S.<br>Sun | OK167332 | OK168369 | –        | –        |
| 59 | 0–20 cm  | 20200810-1-(3)_0–20<br>cm_A_R1_SC2 | CSF20817 | <i>C. hongkongensis</i> | AA-- | L.L. Liu, J.L. Han & L.S.<br>Sun | OK167333 | OK168370 | –        | –        |
| 59 | 0–20 cm  | 20200810-1-(3)_0–20<br>cm_A_R2_SC1 | CSF20818 | <i>C. hongkongensis</i> | AA-- | L.L. Liu, J.L. Han & L.S.<br>Sun | OK167334 | OK168371 | –        | –        |
| 59 | 0–20 cm  | 20200810-1-(3)_0–20<br>cm_A_R2_SC2 | CSF20819 | <i>C. hongkongensis</i> | AA-- | L.L. Liu, J.L. Han & L.S.<br>Sun | OK167335 | OK168372 | –        | –        |
| 59 | 0–20 cm  | 20200810-1-(3)_0–20<br>cm_B_R1_SC1 | CSF20820 | <i>C. hongkongensis</i> | AA-- | L.L. Liu, J.L. Han & L.S.<br>Sun | OK167336 | OK168373 | –        | –        |
| 59 | 0–20 cm  | 20200810-1-(3)_0–20<br>cm_B_R1_SC2 | CSF20821 | <i>C. hongkongensis</i> | AA-- | L.L. Liu, J.L. Han & L.S.<br>Sun | OK167337 | OK168374 | –        | –        |
| 59 | 0–20 cm  | 20200810-1-(3)_0–20<br>cm_B_R2_SC1 | CSF20822 | <i>C. hongkongensis</i> | AA-- | L.L. Liu, J.L. Han & L.S.<br>Sun | OK167338 | OK168375 | –        | –        |
| 59 | 0–20 cm  | 20200810-1-(3)_0–20<br>cm_B_R2_SC2 | CSF20823 | <i>C. hongkongensis</i> | AA-- | L.L. Liu, J.L. Han & L.S.<br>Sun | OK167339 | OK168376 | –        | –        |
| 59 | 60–80 cm | 20200810-1-(3)_0–80<br>cm_A_R1_SC1 | CSF20824 | <i>C. aconidialis</i>   | AA-- | L.L. Liu, J.L. Han & L.S.<br>Sun | OK167764 | OK168801 | –        | –        |
| 59 | 60–80 cm | 20200810-1-(3)_0–80<br>cm_A_R1_SC2 | CSF20825 | <i>C. aconidialis</i>   | AA-- | L.L. Liu, J.L. Han & L.S.<br>Sun | OK167765 | OK168802 | –        | –        |
| 59 | 60–80 cm | 20200810-1-(3)_0–80<br>cm_A_R1_SC3 | CSF20826 | <i>C. aconidialis</i>   | AA-- | L.L. Liu, J.L. Han & L.S.<br>Sun | OK167766 | OK168803 | –        | –        |
| 59 | 60–80 cm | 20200810-1-(3)_0–80<br>cm_A_R1_SC4 | CSF20827 | <i>C. aconidialis</i>   | AA-- | L.L. Liu, J.L. Han & L.S.<br>Sun | OK167767 | OK168804 | –        | –        |
| 60 | 0–20 cm  | 20200810-1-(4)_0–20<br>cm_A_R1_SC1 | CSF20832 | <i>C. hongkongensis</i> | AA-- | L.L. Liu, J.L. Han & L.S.<br>Sun | OK167340 | OK168377 | –        | –        |
| 60 | 0–20 cm  | 20200810-1-(4)_0–20<br>cm_A_R1_SC2 | CSF20833 | <i>C. aconidialis</i>   | AA-- | L.L. Liu, J.L. Han & L.S.<br>Sun | OK167768 | OK168805 | –        | –        |
| 60 | 0–20 cm  | 20200810-1-(4)_0–20<br>cm_B_R1_SC1 | CSF20834 | <i>C. hongkongensis</i> | ADAA | L.L. Liu, J.L. Han & L.S.<br>Sun | OK167604 | OK168641 | OK169120 | OK169204 |
| 60 | 0–20 cm  | 20200810-1-(4)_0–20<br>cm_B_R1_SC2 | CSF20835 | <i>C. aconidialis</i>   | AA-- | L.L. Liu, J.L. Han & L.S.<br>Sun | OK167769 | OK168806 | –        | –        |
| 60 | 0–20 cm  | 20200810-1-(4)_0–20<br>cm_B_R2_SC1 | CSF20836 | <i>C. hongkongensis</i> | AD-- | L.L. Liu, J.L. Han & L.S.<br>Sun | OK167605 | OK168642 | –        | –        |



|    |          |                                    |          |                         |      |                                  |          |          |          |          |
|----|----------|------------------------------------|----------|-------------------------|------|----------------------------------|----------|----------|----------|----------|
| 60 | 0–20 cm  | 20200810-1-(4)_0–20<br>cm_B_R2_SC2 | CSF20837 | <i>C. aconidialis</i>   | AA-- | L.L. Liu, J.L. Han & L.S.<br>Sun | OK167770 | OK168807 | –        | –        |
| 61 | 0–20 cm  | 20200810-1-(5)_0–20<br>cm_A_R1_SC1 | CSF20838 | <i>C. aconidialis</i>   | AA-- | L.L. Liu, J.L. Han & L.S.<br>Sun | OK167771 | OK168808 | –        | –        |
| 61 | 0–20 cm  | 20200810-1-(5)_0–20<br>cm_A_R2_SC1 | CSF20840 | <i>C. hongkongensis</i> | AA-- | L.L. Liu, J.L. Han & L.S.<br>Sun | OK167341 | OK168378 | –        | –        |
| 61 | 0–20 cm  | 20200810-1-(5)_0–20<br>cm_A_R2_SC2 | CSF20841 | <i>C. hongkongensis</i> | AA-- | L.L. Liu, J.L. Han & L.S.<br>Sun | OK167342 | OK168379 | –        | –        |
| 61 | 0–20 cm  | 20200810-1-(5)_0–20<br>cm_B_R1_SC1 | CSF20842 | <i>C. hongkongensis</i> | AA-- | L.L. Liu, J.L. Han & L.S.<br>Sun | OK167343 | OK168380 | –        | –        |
| 61 | 0–20 cm  | 20200810-1-(5)_0–20<br>cm_B_R1_SC2 | CSF20843 | <i>C. hongkongensis</i> | AA-- | L.L. Liu, J.L. Han & L.S.<br>Sun | OK167344 | OK168381 | –        | –        |
| 61 | 0–20 cm  | 20200810-1-(5)_0–20<br>cm_B_R2_SC1 | CSF20844 | <i>C. hongkongensis</i> | AA-- | L.L. Liu, J.L. Han & L.S.<br>Sun | OK167345 | OK168382 | –        | –        |
| 61 | 0–20 cm  | 20200810-1-(5)_0–20<br>cm_B_R2_SC2 | CSF20845 | <i>C. hongkongensis</i> | AA-- | L.L. Liu, J.L. Han & L.S.<br>Sun | OK167346 | OK168383 | –        | –        |
| 61 | 20–40 cm | 20200810-1-(5)_0–40<br>cm_A_R1_SC5 | CSF20850 | <i>C. hongkongensis</i> | AA-- | L.L. Liu, J.L. Han & L.S.<br>Sun | OK167347 | OK168384 | –        | –        |
| 61 | 20–40 cm | 20200810-1-(5)_0–40<br>cm_A_R1_SC6 | CSF20851 | <i>C. hongkongensis</i> | AA-- | L.L. Liu, J.L. Han & L.S.<br>Sun | OK167348 | OK168385 | –        | –        |
| 61 | 20–40 cm | 20200810-1-(5)_0–40<br>cm_A_R1_SC7 | CSF20852 | <i>C. hongkongensis</i> | AA-- | L.L. Liu, J.L. Han & L.S.<br>Sun | OK167349 | OK168386 | –        | –        |
| 61 | 20–40 cm | 20200810-1-(5)_0–40<br>cm_A_R1_SC8 | CSF20853 | <i>C. ilicicola</i>     | BBAA | L.L. Liu, J.L. Han & L.S.<br>Sun | OK168043 | OK169080 | OK169180 | OK169264 |
| 61 | 20–40 cm | 20200810-1-(5)_0–40<br>cm_A_R2_SC1 | CSF20854 | <i>C. hongkongensis</i> | AA-- | L.L. Liu, J.L. Han & L.S.<br>Sun | OK167350 | OK168387 | –        | –        |
| 61 | 20–40 cm | 20200810-1-(5)_0–40<br>cm_A_R2_SC2 | CSF20855 | <i>C. hongkongensis</i> | AA-- | L.L. Liu, J.L. Han & L.S.<br>Sun | OK167351 | OK168388 | –        | –        |
| 61 | 20–40 cm | 20200810-1-(5)_0–40<br>cm_A_R2_SC3 | CSF20856 | <i>C. hongkongensis</i> | AA-- | L.L. Liu, J.L. Han & L.S.<br>Sun | OK167352 | OK168389 | –        | –        |
| 61 | 20–40 cm | 20200810-1-(5)_0–40<br>cm_A_R2_SC4 | CSF20857 | <i>C. hongkongensis</i> | AA-- | L.L. Liu, J.L. Han & L.S.<br>Sun | OK167353 | OK168390 | –        | –        |
| 61 | 20–40 cm | 20200810-1-(5)_0–40<br>cm_B_R1_SC1 | CSF20858 | <i>C. hongkongensis</i> | DA-- | L.L. Liu, J.L. Han & L.S.<br>Sun | OK167689 | OK168726 | –        | –        |

|    |          |                                    |          |                         |      |                                  |          |          |   |   |
|----|----------|------------------------------------|----------|-------------------------|------|----------------------------------|----------|----------|---|---|
| 61 | 20–40 cm | 20200810-1-(5)_0–40<br>cm_B_R1_SC2 | CSF20859 | <i>C. hongkongensis</i> | DA-- | L.L. Liu, J.L. Han & L.S.<br>Sun | OK167690 | OK168727 | – | – |
| 61 | 20–40 cm | 20200810-1-(5)_0–40<br>cm_B_R1_SC3 | CSF20860 | <i>C. hongkongensis</i> | DA-- | L.L. Liu, J.L. Han & L.S.<br>Sun | OK167691 | OK168728 | – | – |
| 61 | 20–40 cm | 20200810-1-(5)_0–40<br>cm_B_R1_SC4 | CSF20861 | <i>C. hongkongensis</i> | DA-- | L.L. Liu, J.L. Han & L.S.<br>Sun | OK167692 | OK168729 | – | – |
| 61 | 20–40 cm | 20200810-1-(5)_0–40<br>cm_B_R2_SC1 | CSF20862 | <i>C. hongkongensis</i> | AA-- | L.L. Liu, J.L. Han & L.S.<br>Sun | OK167354 | OK168391 | – | – |
| 61 | 20–40 cm | 20200810-1-(5)_0–40<br>cm_B_R2_SC2 | CSF20863 | <i>C. hongkongensis</i> | AA-- | L.L. Liu, J.L. Han & L.S.<br>Sun | OK167355 | OK168392 | – | – |
| 61 | 20–40 cm | 20200810-1-(5)_0–40<br>cm_B_R2_SC3 | CSF20864 | <i>C. hongkongensis</i> | AA-- | L.L. Liu, J.L. Han & L.S.<br>Sun | OK167356 | OK168393 | – | – |
| 61 | 20–40 cm | 20200810-1-(5)_0–40<br>cm_B_R2_SC4 | CSF20865 | <i>C. hongkongensis</i> | AA-- | L.L. Liu, J.L. Han & L.S.<br>Sun | OK167357 | OK168394 | – | – |
| 62 | 0–20 cm  | 20200810-1-(6)_0–20<br>cm_A_R1_SC1 | CSF20866 | <i>C. aconidialis</i>   | AA-- | L.L. Liu, J.L. Han & L.S.<br>Sun | OK167772 | OK168809 | – | – |
| 62 | 0–20 cm  | 20200810-1-(6)_0–20<br>cm_A_R1_SC2 | CSF20867 | <i>C. aconidialis</i>   | AA-- | L.L. Liu, J.L. Han & L.S.<br>Sun | OK167773 | OK168810 | – | – |
| 62 | 0–20 cm  | 20200810-1-(6)_0–20<br>cm_A_R2_SC1 | CSF20868 | <i>C. aconidialis</i>   | AA-- | L.L. Liu, J.L. Han & L.S.<br>Sun | OK167774 | OK168811 | – | – |
| 62 | 0–20 cm  | 20200810-1-(6)_0–20<br>cm_A_R2_SC2 | CSF20869 | <i>C. aconidialis</i>   | AA-- | L.L. Liu, J.L. Han & L.S.<br>Sun | OK167775 | OK168812 | – | – |
| 62 | 0–20 cm  | 20200810-1-(6)_0–20<br>cm_B_R1_SC1 | CSF20870 | <i>C. aconidialis</i>   | AA-- | L.L. Liu, J.L. Han & L.S.<br>Sun | OK167776 | OK168813 | – | – |
| 62 | 0–20 cm  | 20200810-1-(6)_0–20<br>cm_B_R1_SC2 | CSF20871 | <i>C. aconidialis</i>   | AA-- | L.L. Liu, J.L. Han & L.S.<br>Sun | OK167777 | OK168814 | – | – |
| 62 | 0–20 cm  | 20200810-1-(6)_0–20<br>cm_B_R2_SC1 | CSF20872 | <i>C. aconidialis</i>   | AA-- | L.L. Liu, J.L. Han & L.S.<br>Sun | OK167778 | OK168815 | – | – |
| 62 | 0–20 cm  | 20200810-1-(6)_0–20<br>cm_B_R2_SC2 | CSF20873 | <i>C. aconidialis</i>   | AA-- | L.L. Liu, J.L. Han & L.S.<br>Sun | OK167779 | OK168816 | – | – |
| 62 | 20–40 cm | 20200810-1-(6)_0–40<br>cm_A_R1_SC1 | CSF20874 | <i>C. aconidialis</i>   | AA-- | L.L. Liu, J.L. Han & L.S.<br>Sun | OK167780 | OK168817 | – | – |
| 62 | 20–40 cm | 20200810-1-(6)_0–40<br>cm_A_R1_SC2 | CSF20875 | <i>C. aconidialis</i>   | AA-- | L.L. Liu, J.L. Han & L.S.<br>Sun | OK167781 | OK168818 | – | – |

|    |          |                                    |          |                         |      |                                  |          |          |   |   |
|----|----------|------------------------------------|----------|-------------------------|------|----------------------------------|----------|----------|---|---|
| 62 | 20–40 cm | 20200810-1-(6)_0–40<br>cm_A_R1_SC3 | CSF20876 | <i>C. aconidialis</i>   | AA-- | L.L. Liu, J.L. Han & L.S.<br>Sun | OK167782 | OK168819 | – | – |
| 62 | 20–40 cm | 20200810-1-(6)_0–40<br>cm_A_R1_SC4 | CSF20877 | <i>C. aconidialis</i>   | AA-- | L.L. Liu, J.L. Han & L.S.<br>Sun | OK167783 | OK168820 | – | – |
| 62 | 20–40 cm | 20200810-1-(6)_0–40<br>cm_A_R2_SC1 | CSF20878 | <i>C. aconidialis</i>   | AC-- | L.L. Liu, J.L. Han & L.S.<br>Sun | OK167894 | OK168931 | – | – |
| 62 | 20–40 cm | 20200810-1-(6)_0–40<br>cm_A_R2_SC2 | CSF20879 | <i>C. aconidialis</i>   | AA-- | L.L. Liu, J.L. Han & L.S.<br>Sun | OK167784 | OK168821 | – | – |
| 62 | 20–40 cm | 20200810-1-(6)_0–40<br>cm_A_R2_SC3 | CSF20880 | <i>C. aconidialis</i>   | AA-- | L.L. Liu, J.L. Han & L.S.<br>Sun | OK167785 | OK168822 | – | – |
| 62 | 20–40 cm | 20200810-1-(6)_0–40<br>cm_A_R2_SC4 | CSF20881 | <i>C. aconidialis</i>   | AA-- | L.L. Liu, J.L. Han & L.S.<br>Sun | OK167786 | OK168823 | – | – |
| 62 | 20–40 cm | 20200810-1-(6)_0–40<br>cm_B_R1_SC1 | CSF20882 | <i>C. aconidialis</i>   | AC-- | L.L. Liu, J.L. Han & L.S.<br>Sun | OK167895 | OK168932 | – | – |
| 62 | 20–40 cm | 20200810-1-(6)_0–40<br>cm_B_R1_SC2 | CSF20883 | <i>C. aconidialis</i>   | AC-- | L.L. Liu, J.L. Han & L.S.<br>Sun | OK167896 | OK168933 | – | – |
| 62 | 20–40 cm | 20200810-1-(6)_0–40<br>cm_B_R1_SC3 | CSF20884 | <i>C. aconidialis</i>   | AA-- | L.L. Liu, J.L. Han & L.S.<br>Sun | OK167787 | OK168824 | – | – |
| 62 | 20–40 cm | 20200810-1-(6)_0–40<br>cm_B_R1_SC4 | CSF20885 | <i>C. aconidialis</i>   | AC-- | L.L. Liu, J.L. Han & L.S.<br>Sun | OK167897 | OK168934 | – | – |
| 62 | 20–40 cm | 20200810-1-(6)_0–40<br>cm_B_R2_SC1 | CSF20886 | <i>C. aconidialis</i>   | AA-- | L.L. Liu, J.L. Han & L.S.<br>Sun | OK167788 | OK168825 | – | – |
| 62 | 20–40 cm | 20200810-1-(6)_0–40<br>cm_B_R2_SC2 | CSF20887 | <i>C. aconidialis</i>   | AA-- | L.L. Liu, J.L. Han & L.S.<br>Sun | OK167789 | OK168826 | – | – |
| 62 | 20–40 cm | 20200810-1-(6)_0–40<br>cm_B_R2_SC3 | CSF20888 | <i>C. aconidialis</i>   | AA-- | L.L. Liu, J.L. Han & L.S.<br>Sun | OK167790 | OK168827 | – | – |
| 62 | 20–40 cm | 20200810-1-(6)_0–40<br>cm_B_R2_SC4 | CSF20889 | <i>C. aconidialis</i>   | AA-- | L.L. Liu, J.L. Han & L.S.<br>Sun | OK167791 | OK168828 | – | – |
| 63 | 0–20 cm  | 20200810-1-(7)_0–20<br>cm_A_R1_SC1 | CSF20890 | <i>C. hongkongensis</i> | AA-- | L.L. Liu, J.L. Han & L.S.<br>Sun | OK167358 | OK168395 | – | – |
| 63 | 0–20 cm  | 20200810-1-(7)_0–20<br>cm_A_R1_SC2 | CSF20891 | <i>C. hongkongensis</i> | DA-- | L.L. Liu, J.L. Han & L.S.<br>Sun | OK167693 | OK168730 | – | – |
| 63 | 0–20 cm  | 20200810-1-(7)_0–20<br>cm_A_R2_SC1 | CSF20892 | <i>C. kyotensis</i>     | AB-- | L.L. Liu, J.L. Han & L.S.<br>Sun | OK167993 | OK169030 | – | – |

|    |          |                                    |          |                         |      |                                  |          |          |   |   |
|----|----------|------------------------------------|----------|-------------------------|------|----------------------------------|----------|----------|---|---|
| 63 | 0–20 cm  | 20200810-1-(7)_0–20<br>cm_A_R2_SC2 | CSF20893 | <i>C. hongkongensis</i> | AA-- | L.L. Liu, J.L. Han & L.S.<br>Sun | OK167359 | OK168396 | – | – |
| 63 | 0–20 cm  | 20200810-1-(7)_0–20<br>cm_B_R1_SC1 | CSF20894 | <i>C. hongkongensis</i> | AA-- | L.L. Liu, J.L. Han & L.S.<br>Sun | OK167360 | OK168397 | – | – |
| 63 | 0–20 cm  | 20200810-1-(7)_0–20<br>cm_B_R1_SC2 | CSF20895 | <i>C. aconidialis</i>   | AC-- | L.L. Liu, J.L. Han & L.S.<br>Sun | OK167898 | OK168935 | – | – |
| 63 | 0–20 cm  | 20200810-1-(7)_0–20<br>cm_B_R2_SC1 | CSF20896 | <i>C. hongkongensis</i> | AA-- | L.L. Liu, J.L. Han & L.S.<br>Sun | OK167361 | OK168398 | – | – |
| 63 | 0–20 cm  | 20200810-1-(7)_0–20<br>cm_B_R2_SC2 | CSF20897 | <i>C. hongkongensis</i> | AA-- | L.L. Liu, J.L. Han & L.S.<br>Sun | OK167362 | OK168399 | – | – |
| 63 | 20–40 cm | 20200810-1-(7)_0–40<br>cm_B_R1_SC1 | CSF20898 | <i>C. hongkongensis</i> | AA-- | L.L. Liu, J.L. Han & L.S.<br>Sun | OK167363 | OK168400 | – | – |
| 63 | 20–40 cm | 20200810-1-(7)_0–40<br>cm_B_R1_SC2 | CSF20899 | <i>C. hongkongensis</i> | AA-- | L.L. Liu, J.L. Han & L.S.<br>Sun | OK167364 | OK168401 | – | – |
| 63 | 20–40 cm | 20200810-1-(7)_0–40<br>cm_B_R1_SC3 | CSF20900 | <i>C. hongkongensis</i> | AA-- | L.L. Liu, J.L. Han & L.S.<br>Sun | OK167365 | OK168402 | – | – |
| 63 | 20–40 cm | 20200810-1-(7)_0–40<br>cm_B_R1_SC4 | CSF20901 | <i>C. hongkongensis</i> | AA-- | L.L. Liu, J.L. Han & L.S.<br>Sun | OK167366 | OK168403 | – | – |
| 64 | 0–20 cm  | 20200810-1-(8)_0–20<br>cm_A_R1_SC1 | CSF20910 | <i>C. aconidialis</i>   | AA-- | L.L. Liu, J.L. Han & L.S.<br>Sun | OK167792 | OK168829 | – | – |
| 64 | 0–20 cm  | 20200810-1-(8)_0–20<br>cm_A_R1_SC2 | CSF20911 | <i>C. aconidialis</i>   | AC-- | L.L. Liu, J.L. Han & L.S.<br>Sun | OK167899 | OK168936 | – | – |
| 64 | 0–20 cm  | 20200810-1-(8)_0–20<br>cm_A_R2_SC1 | CSF20912 | <i>C. aconidialis</i>   | AA-- | L.L. Liu, J.L. Han & L.S.<br>Sun | OK167793 | OK168830 | – | – |
| 64 | 0–20 cm  | 20200810-1-(8)_0–20<br>cm_A_R2_SC2 | CSF20913 | <i>C. aconidialis</i>   | AC-- | L.L. Liu, J.L. Han & L.S.<br>Sun | OK167900 | OK168937 | – | – |
| 64 | 0–20 cm  | 20200810-1-(8)_0–20<br>cm_B_R1_SC1 | CSF20914 | <i>C. aconidialis</i>   | AA-- | L.L. Liu, J.L. Han & L.S.<br>Sun | OK167794 | OK168831 | – | – |
| 64 | 0–20 cm  | 20200810-1-(8)_0–20<br>cm_B_R1_SC2 | CSF20915 | <i>C. aconidialis</i>   | AA-- | L.L. Liu, J.L. Han & L.S.<br>Sun | OK167795 | OK168832 | – | – |
| 64 | 0–20 cm  | 20200810-1-(8)_0–20<br>cm_B_R2_SC1 | CSF20916 | <i>C. aconidialis</i>   | AA-- | L.L. Liu, J.L. Han & L.S.<br>Sun | OK167796 | OK168833 | – | – |
| 64 | 0–20 cm  | 20200810-1-(8)_0–20<br>cm_B_R2_SC2 | CSF20917 | <i>C. aconidialis</i>   | AA-- | L.L. Liu, J.L. Han & L.S.<br>Sun | OK167797 | OK168834 | – | – |

|    |          |                                    |          |                         |      |                                  |          |          |          |          |
|----|----------|------------------------------------|----------|-------------------------|------|----------------------------------|----------|----------|----------|----------|
| 64 | 20–40 cm | 20200810-1-(8)_0–40<br>cm_B_R2_SC4 | CSF20918 | <i>C. aconidialis</i>   | AC-- | L.L. Liu, J.L. Han & L.S.<br>Sun | OK167901 | OK168938 | –        | –        |
| 64 | 40–60 cm | 20200810-1-(8)_0–60<br>cm_B_R2_SC1 | CSF20919 | <i>C. hongkongensis</i> | AA-- | L.L. Liu, J.L. Han & L.S.<br>Sun | OK167367 | OK168404 | –        | –        |
| 64 | 40–60 cm | 20200810-1-(8)_0–60<br>cm_B_R2_SC2 | CSF20920 | <i>C. hongkongensis</i> | AA-- | L.L. Liu, J.L. Han & L.S.<br>Sun | OK167368 | OK168405 | –        | –        |
| 64 | 40–60 cm | 20200810-1-(8)_0–60<br>cm_B_R2_SC3 | CSF20921 | <i>C. hongkongensis</i> | AA-- | L.L. Liu, J.L. Han & L.S.<br>Sun | OK167369 | OK168406 | –        | –        |
| 64 | 40–60 cm | 20200810-1-(8)_0–60<br>cm_B_R2_SC4 | CSF20922 | <i>C. hongkongensis</i> | AA-- | L.L. Liu, J.L. Han & L.S.<br>Sun | OK167370 | OK168407 | –        | –        |
| 65 | 0–20 cm  | 20200811-1-(1)_0–20<br>cm_A_R1_SC1 | CSF20923 | <i>C. hongkongensis</i> | AEAA | L.L. Liu, J.L. Han & L.S.<br>Sun | OK167608 | OK168645 | OK169122 | OK169206 |
| 65 | 0–20 cm  | 20200811-1-(1)_0–20<br>cm_A_R1_SC2 | CSF20924 | <i>C. hongkongensis</i> | AEAA | L.L. Liu, J.L. Han & L.S.<br>Sun | OK167609 | OK168646 | OK169123 | OK169207 |
| 65 | 0–20 cm  | 20200811-1-(1)_0–20<br>cm_A_R2_SC1 | CSF20925 | <i>C. hongkongensis</i> | AA-- | L.L. Liu, J.L. Han & L.S.<br>Sun | OK167371 | OK168408 | –        | –        |
| 65 | 0–20 cm  | 20200811-1-(1)_0–20<br>cm_A_R2_SC2 | CSF20926 | <i>C. hongkongensis</i> | AA-- | L.L. Liu, J.L. Han & L.S.<br>Sun | OK167372 | OK168409 | –        | –        |
| 66 | 0–20 cm  | 20200811-1-(2)_0–20<br>cm_A_R1_SC1 | CSF20927 | <i>C. kyotensis</i>     | AA-- | L.L. Liu, J.L. Han & L.S.<br>Sun | OK167958 | OK168995 | –        | –        |
| 66 | 0–20 cm  | 20200811-1-(2)_0–20<br>cm_A_R1_SC2 | CSF20928 | <i>C. hongkongensis</i> | AD-- | L.L. Liu, J.L. Han & L.S.<br>Sun | OK167606 | OK168643 | –        | –        |
| 66 | 0–20 cm  | 20200811-1-(2)_0–20<br>cm_A_R2_SC2 | CSF20930 | <i>C. kyotensis</i>     | AA-- | L.L. Liu, J.L. Han & L.S.<br>Sun | OK167959 | OK168996 | –        | –        |
| 66 | 0–20 cm  | 20200811-1-(2)_0–20<br>cm_B_R1_SC1 | CSF20931 | <i>C. hongkongensis</i> | AA-- | L.L. Liu, J.L. Han & L.S.<br>Sun | OK167373 | OK168410 | –        | –        |
| 66 | 0–20 cm  | 20200811-1-(2)_0–20<br>cm_B_R1_SC2 | CSF20932 | <i>C. hongkongensis</i> | AA-- | L.L. Liu, J.L. Han & L.S.<br>Sun | OK167374 | OK168411 | –        | –        |
| 66 | 0–20 cm  | 20200811-1-(2)_0–20<br>cm_B_R2_SC1 | CSF20933 | <i>C. hongkongensis</i> | AA-- | L.L. Liu, J.L. Han & L.S.<br>Sun | OK167375 | OK168412 | –        | –        |
| 66 | 0–20 cm  | 20200811-1-(2)_0–20<br>cm_B_R2_SC2 | CSF20934 | <i>C. kyotensis</i>     | AA-- | L.L. Liu, J.L. Han & L.S.<br>Sun | OK167960 | OK168997 | –        | –        |
| 67 | 0–20 cm  | 20200811-1-(3)_0–20<br>cm_A_R1_SC1 | CSF20935 | <i>C. aconidialis</i>   | AC-- | L.L. Liu, J.L. Han & L.S.<br>Sun | OK167902 | OK168939 | –        | –        |

|    |          |                                    |          |                       |      |                                  |          |          |   |   |
|----|----------|------------------------------------|----------|-----------------------|------|----------------------------------|----------|----------|---|---|
| 67 | 0–20 cm  | 20200811-1-(3)_0–20<br>cm_A_R1_SC2 | CSF20936 | <i>C. aconidialis</i> | AC-- | L.L. Liu, J.L. Han & L.S.<br>Sun | OK167903 | OK168940 | – | – |
| 67 | 0–20 cm  | 20200811-1-(3)_0–20<br>cm_A_R2_SC1 | CSF20937 | <i>C. aconidialis</i> | AC-- | L.L. Liu, J.L. Han & L.S.<br>Sun | OK167904 | OK168941 | – | – |
| 67 | 0–20 cm  | 20200811-1-(3)_0–20<br>cm_A_R2_SC2 | CSF20938 | <i>C. aconidialis</i> | AC-- | L.L. Liu, J.L. Han & L.S.<br>Sun | OK167905 | OK168942 | – | – |
| 67 | 0–20 cm  | 20200811-1-(3)_0–20<br>cm_B_R1_SC1 | CSF20939 | <i>C. aconidialis</i> | AC-- | L.L. Liu, J.L. Han & L.S.<br>Sun | OK167906 | OK168943 | – | – |
| 67 | 0–20 cm  | 20200811-1-(3)_0–20<br>cm_B_R1_SC2 | CSF20940 | <i>C. aconidialis</i> | AC-- | L.L. Liu, J.L. Han & L.S.<br>Sun | OK167907 | OK168944 | – | – |
| 67 | 0–20 cm  | 20200811-1-(3)_0–20<br>cm_B_R2_SC1 | CSF20941 | <i>C. aconidialis</i> | AA-- | L.L. Liu, J.L. Han & L.S.<br>Sun | OK167798 | OK168835 | – | – |
| 67 | 0–20 cm  | 20200811-1-(3)_0–20<br>cm_B_R2_SC2 | CSF20942 | <i>C. aconidialis</i> | AC-- | L.L. Liu, J.L. Han & L.S.<br>Sun | OK167908 | OK168945 | – | – |
| 67 | 20–40 cm | 20200811-1-(3)_0–40<br>cm_A_R1_SC1 | CSF20943 | <i>C. aconidialis</i> | AC-- | L.L. Liu, J.L. Han & L.S.<br>Sun | OK167909 | OK168946 | – | – |
| 67 | 20–40 cm | 20200811-1-(3)_0–40<br>cm_A_R1_SC2 | CSF20944 | <i>C. aconidialis</i> | AC-- | L.L. Liu, J.L. Han & L.S.<br>Sun | OK167910 | OK168947 | – | – |
| 67 | 20–40 cm | 20200811-1-(3)_0–40<br>cm_A_R1_SC3 | CSF20945 | <i>C. aconidialis</i> | AC-- | L.L. Liu, J.L. Han & L.S.<br>Sun | OK167911 | OK168948 | – | – |
| 67 | 20–40 cm | 20200811-1-(3)_0–40<br>cm_A_R1_SC4 | CSF20946 | <i>C. aconidialis</i> | AC-- | L.L. Liu, J.L. Han & L.S.<br>Sun | OK167912 | OK168949 | – | – |
| 67 | 20–40 cm | 20200811-1-(3)_0–40<br>cm_A_R2_SC1 | CSF20947 | <i>C. aconidialis</i> | AC-- | L.L. Liu, J.L. Han & L.S.<br>Sun | OK167913 | OK168950 | – | – |
| 67 | 20–40 cm | 20200811-1-(3)_0–40<br>cm_A_R2_SC2 | CSF20948 | <i>C. aconidialis</i> | AC-- | L.L. Liu, J.L. Han & L.S.<br>Sun | OK167914 | OK168951 | – | – |
| 67 | 20–40 cm | 20200811-1-(3)_0–40<br>cm_A_R2_SC3 | CSF20949 | <i>C. aconidialis</i> | AC-- | L.L. Liu, J.L. Han & L.S.<br>Sun | OK167915 | OK168952 | – | – |
| 67 | 20–40 cm | 20200811-1-(3)_0–40<br>cm_A_R2_SC4 | CSF20950 | <i>C. aconidialis</i> | AC-- | L.L. Liu, J.L. Han & L.S.<br>Sun | OK167916 | OK168953 | – | – |
| 67 | 20–40 cm | 20200811-1-(3)_0–40<br>cm_B_R1_SC1 | CSF20951 | <i>C. aconidialis</i> | AC-- | L.L. Liu, J.L. Han & L.S.<br>Sun | OK167917 | OK168954 | – | – |
| 67 | 20–40 cm | 20200811-1-(3)_0–40<br>cm_B_R1_SC2 | CSF20952 | <i>C. aconidialis</i> | AC-- | L.L. Liu, J.L. Han & L.S.<br>Sun | OK167918 | OK168955 | – | – |

|    |          |                                    |          |                       |      |                                  |          |          |   |   |
|----|----------|------------------------------------|----------|-----------------------|------|----------------------------------|----------|----------|---|---|
| 67 | 20–40 cm | 20200811-1-(3)_0–40<br>cm_B_R1_SC3 | CSF20953 | <i>C. aconidialis</i> | AC-- | L.L. Liu, J.L. Han & L.S.<br>Sun | OK167919 | OK168956 | – | – |
| 67 | 20–40 cm | 20200811-1-(3)_0–40<br>cm_B_R1_SC4 | CSF20954 | <i>C. aconidialis</i> | AC-- | L.L. Liu, J.L. Han & L.S.<br>Sun | OK167920 | OK168957 | – | – |
| 67 | 20–40 cm | 20200811-1-(3)_0–40<br>cm_B_R2_SC1 | CSF20955 | <i>C. aconidialis</i> | AC-- | L.L. Liu, J.L. Han & L.S.<br>Sun | OK167921 | OK168958 | – | – |
| 67 | 20–40 cm | 20200811-1-(3)_0–40<br>cm_B_R2_SC2 | CSF20956 | <i>C. aconidialis</i> | AC-- | L.L. Liu, J.L. Han & L.S.<br>Sun | OK167922 | OK168959 | – | – |
| 67 | 20–40 cm | 20200811-1-(3)_0–40<br>cm_B_R2_SC3 | CSF20957 | <i>C. aconidialis</i> | AC-- | L.L. Liu, J.L. Han & L.S.<br>Sun | OK167923 | OK168960 | – | – |
| 67 | 20–40 cm | 20200811-1-(3)_0–40<br>cm_B_R2_SC4 | CSF20958 | <i>C. aconidialis</i> | AC-- | L.L. Liu, J.L. Han & L.S.<br>Sun | OK167924 | OK168961 | – | – |
| 67 | 40–60 cm | 20200811-1-(3)_0–60<br>cm_A_R1_SC1 | CSF20959 | <i>C. aconidialis</i> | AC-- | L.L. Liu, J.L. Han & L.S.<br>Sun | OK167925 | OK168962 | – | – |
| 67 | 40–60 cm | 20200811-1-(3)_0–60<br>cm_A_R1_SC2 | CSF20960 | <i>C. aconidialis</i> | AC-- | L.L. Liu, J.L. Han & L.S.<br>Sun | OK167926 | OK168963 | – | – |
| 67 | 40–60 cm | 20200811-1-(3)_0–60<br>cm_A_R1_SC3 | CSF20961 | <i>C. aconidialis</i> | AC-- | L.L. Liu, J.L. Han & L.S.<br>Sun | OK167927 | OK168964 | – | – |
| 67 | 40–60 cm | 20200811-1-(3)_0–60<br>cm_A_R1_SC4 | CSF20962 | <i>C. aconidialis</i> | AC-- | L.L. Liu, J.L. Han & L.S.<br>Sun | OK167928 | OK168965 | – | – |
| 67 | 40–60 cm | 20200811-1-(3)_0–60<br>cm_A_R2_SC1 | CSF20963 | <i>C. aconidialis</i> | AC-- | L.L. Liu, J.L. Han & L.S.<br>Sun | OK167929 | OK168966 | – | – |
| 67 | 40–60 cm | 20200811-1-(3)_0–60<br>cm_A_R2_SC2 | CSF20964 | <i>C. aconidialis</i> | AC-- | L.L. Liu, J.L. Han & L.S.<br>Sun | OK167930 | OK168967 | – | – |
| 67 | 40–60 cm | 20200811-1-(3)_0–60<br>cm_A_R2_SC3 | CSF20965 | <i>C. aconidialis</i> | AC-- | L.L. Liu, J.L. Han & L.S.<br>Sun | OK167931 | OK168968 | – | – |
| 67 | 40–60 cm | 20200811-1-(3)_0–60<br>cm_A_R2_SC4 | CSF20966 | <i>C. aconidialis</i> | AC-- | L.L. Liu, J.L. Han & L.S.<br>Sun | OK167932 | OK168969 | – | – |
| 67 | 40–60 cm | 20200811-1-(3)_0–60<br>cm_B_R2_SC1 | CSF20967 | <i>C. aconidialis</i> | AC-- | L.L. Liu, J.L. Han & L.S.<br>Sun | OK167933 | OK168970 | – | – |
| 67 | 40–60 cm | 20200811-1-(3)_0–60<br>cm_B_R2_SC2 | CSF20968 | <i>C. aconidialis</i> | AC-- | L.L. Liu, J.L. Han & L.S.<br>Sun | OK167934 | OK168971 | – | – |
| 67 | 40–60 cm | 20200811-1-(3)_0–60<br>cm_B_R2_SC3 | CSF20969 | <i>C. aconidialis</i> | AC-- | L.L. Liu, J.L. Han & L.S.<br>Sun | OK167935 | OK168972 | – | – |

|    |          |                                    |          |                         |      |                                  |          |          |          |          |
|----|----------|------------------------------------|----------|-------------------------|------|----------------------------------|----------|----------|----------|----------|
| 67 | 40–60 cm | 20200811-1-(3)_0–60<br>cm_B_R2_SC4 | CSF20970 | <i>C. aconidialis</i>   | AC-- | L.L. Liu, J.L. Han & L.S.<br>Sun | OK167936 | OK168973 | –        | –        |
| 68 | 0–20 cm  | 20200811-1-(4)_0–20<br>cm_A_R2_SC1 | CSF20971 | <i>C. aconidialis</i>   | AA-- | L.L. Liu, J.L. Han & L.S.<br>Sun | OK167799 | OK168836 | –        | –        |
| 68 | 0–20 cm  | 20200811-1-(4)_0–20<br>cm_A_R2_SC2 | CSF20972 | <i>C. aconidialis</i>   | AA-- | L.L. Liu, J.L. Han & L.S.<br>Sun | OK167800 | OK168837 | –        | –        |
| 68 | 0–20 cm  | 20200811-1-(4)_0–20<br>cm_B_R1_SC1 | CSF20973 | <i>C. hongkongensis</i> | AA-- | L.L. Liu, J.L. Han & L.S.<br>Sun | OK167376 | OK168413 | –        | –        |
| 68 | 0–20 cm  | 20200811-1-(4)_0–20<br>cm_B_R1_SC2 | CSF20974 | <i>C. hongkongensis</i> | AA-- | L.L. Liu, J.L. Han & L.S.<br>Sun | OK167377 | OK168414 | –        | –        |
| 68 | 20–40 cm | 20200811-1-(4)_0–40<br>cm_A_R1_SC1 | CSF20975 | <i>C. aconidialis</i>   | AA-- | L.L. Liu, J.L. Han & L.S.<br>Sun | OK167801 | OK168838 | –        | –        |
| 68 | 20–40 cm | 20200811-1-(4)_0–40<br>cm_A_R1_SC2 | CSF20976 | <i>C. aconidialis</i>   | AA-- | L.L. Liu, J.L. Han & L.S.<br>Sun | OK167802 | OK168839 | –        | –        |
| 68 | 20–40 cm | 20200811-1-(4)_0–40<br>cm_A_R1_SC3 | CSF20977 | <i>C. aconidialis</i>   | AA-- | L.L. Liu, J.L. Han & L.S.<br>Sun | OK167803 | OK168840 | –        | –        |
| 68 | 20–40 cm | 20200811-1-(4)_0–40<br>cm_A_R1_SC4 | CSF20978 | <i>C. aconidialis</i>   | AA-- | L.L. Liu, J.L. Han & L.S.<br>Sun | OK167804 | OK168841 | –        | –        |
| 68 | 20–40 cm | 20200811-1-(4)_0–40<br>cm_A_R2_SC1 | CSF20979 | <i>C. aconidialis</i>   | AA-- | L.L. Liu, J.L. Han & L.S.<br>Sun | OK167805 | OK168842 | –        | –        |
| 68 | 20–40 cm | 20200811-1-(4)_0–40<br>cm_A_R2_SC2 | CSF20980 | <i>C. aconidialis</i>   | AA-- | L.L. Liu, J.L. Han & L.S.<br>Sun | OK167806 | OK168843 | –        | –        |
| 68 | 20–40 cm | 20200811-1-(4)_0–40<br>cm_A_R2_SC3 | CSF20981 | <i>C. aconidialis</i>   | AA-- | L.L. Liu, J.L. Han & L.S.<br>Sun | OK167807 | OK168844 | –        | –        |
| 68 | 20–40 cm | 20200811-1-(4)_0–40<br>cm_A_R2_SC4 | CSF20982 | <i>C. aconidialis</i>   | AA-- | L.L. Liu, J.L. Han & L.S.<br>Sun | OK167808 | OK168845 | –        | –        |
| 68 | 20–40 cm | 20200811-1-(4)_0–40<br>cm_B_R1_SC1 | CSF20983 | <i>C. aconidialis</i>   | AA-- | L.L. Liu, J.L. Han & L.S.<br>Sun | OK167809 | OK168846 | –        | –        |
| 68 | 20–40 cm | 20200811-1-(4)_0–40<br>cm_B_R1_SC2 | CSF20984 | <i>C. aconidialis</i>   | AA-- | L.L. Liu, J.L. Han & L.S.<br>Sun | OK167810 | OK168847 | –        | –        |
| 68 | 20–40 cm | 20200811-1-(4)_0–40<br>cm_B_R1_SC3 | CSF20985 | <i>C. aconidialis</i>   | ABBA | L.L. Liu, J.L. Han & L.S.<br>Sun | OK167856 | OK168893 | OK169152 | OK169236 |
| 68 | 20–40 cm | 20200811-1-(4)_0–40<br>cm_B_R2_SC1 | CSF20987 | <i>C. aconidialis</i>   | AA-- | L.L. Liu, J.L. Han & L.S.<br>Sun | OK167811 | OK168848 | –        | –        |



|    |          |                                    |          |                         |      |                                  |          |          |   |   |
|----|----------|------------------------------------|----------|-------------------------|------|----------------------------------|----------|----------|---|---|
| 68 | 20–40 cm | 20200811-1-(4)_0–40<br>cm_B_R2_SC2 | CSF20988 | <i>C. aconidialis</i>   | AA-- | L.L. Liu, J.L. Han & L.S.<br>Sun | OK167812 | OK168849 | – | – |
| 68 | 20–40 cm | 20200811-1-(4)_0–40<br>cm_B_R2_SC3 | CSF20989 | <i>C. aconidialis</i>   | AA-- | L.L. Liu, J.L. Han & L.S.<br>Sun | OK167813 | OK168850 | – | – |
| 68 | 20–40 cm | 20200811-1-(4)_0–40<br>cm_B_R2_SC4 | CSF20990 | <i>C. aconidialis</i>   | AA-- | L.L. Liu, J.L. Han & L.S.<br>Sun | OK167814 | OK168851 | – | – |
| 69 | 0–20 cm  | 20200811-1-(5)_0–20<br>cm_A_R1_SC1 | CSF20991 | <i>C. hongkongensis</i> | AA-- | L.L. Liu, J.L. Han & L.S.<br>Sun | OK167378 | OK168415 | – | – |
| 69 | 0–20 cm  | 20200811-1-(5)_0–20<br>cm_A_R1_SC2 | CSF20992 | <i>C. kyotensis</i>     | AA-- | L.L. Liu, J.L. Han & L.S.<br>Sun | OK167961 | OK168998 | – | – |
| 69 | 0–20 cm  | 20200811-1-(5)_0–20<br>cm_B_R1_SC1 | CSF20993 | <i>C. hongkongensis</i> | AA-- | L.L. Liu, J.L. Han & L.S.<br>Sun | OK167379 | OK168416 | – | – |
| 69 | 0–20 cm  | 20200811-1-(5)_0–20<br>cm_B_R1_SC2 | CSF20994 | <i>C. kyotensis</i>     | AA-- | L.L. Liu, J.L. Han & L.S.<br>Sun | OK167962 | OK168999 | – | – |
| 69 | 0–20 cm  | 20200811-1-(5)_0–20<br>cm_B_R2_SC1 | CSF20995 | <i>C. aconidialis</i>   | AA-- | L.L. Liu, J.L. Han & L.S.<br>Sun | OK167815 | OK168852 | – | – |
| 69 | 0–20 cm  | 20200811-1-(5)_0–20<br>cm_B_R2_SC2 | CSF20996 | <i>C. kyotensis</i>     | AA-- | L.L. Liu, J.L. Han & L.S.<br>Sun | OK167963 | OK169000 | – | – |
| 69 | 20–40 cm | 20200811-1-(5)_0–40<br>cm_A_R1_SC1 | CSF20997 | <i>C. hongkongensis</i> | AA-- | L.L. Liu, J.L. Han & L.S.<br>Sun | OK167380 | OK168417 | – | – |
| 69 | 20–40 cm | 20200811-1-(5)_0–40<br>cm_A_R1_SC2 | CSF20998 | <i>C. hongkongensis</i> | AA-- | L.L. Liu, J.L. Han & L.S.<br>Sun | OK167381 | OK168418 | – | – |
| 69 | 20–40 cm | 20200811-1-(5)_0–40<br>cm_A_R1_SC3 | CSF20999 | <i>C. hongkongensis</i> | AA-- | L.L. Liu, J.L. Han & L.S.<br>Sun | OK167382 | OK168419 | – | – |
| 69 | 20–40 cm | 20200811-1-(5)_0–40<br>cm_A_R1_SC4 | CSF21000 | <i>C. hongkongensis</i> | AA-- | L.L. Liu, J.L. Han & L.S.<br>Sun | OK167383 | OK168420 | – | – |
| 69 | 40–60 cm | 20200811-1-(5)_0–60<br>cm_B_R2_SC1 | CSF21001 | <i>C. hongkongensis</i> | AA-- | L.L. Liu, J.L. Han & L.S.<br>Sun | OK167384 | OK168421 | – | – |
| 69 | 40–60 cm | 20200811-1-(5)_0–60<br>cm_B_R2_SC2 | CSF21002 | <i>C. hongkongensis</i> | AA-- | L.L. Liu, J.L. Han & L.S.<br>Sun | OK167385 | OK168422 | – | – |
| 69 | 40–60 cm | 20200811-1-(5)_0–60<br>cm_B_R2_SC3 | CSF21003 | <i>C. hongkongensis</i> | AA-- | L.L. Liu, J.L. Han & L.S.<br>Sun | OK167386 | OK168423 | – | – |
| 69 | 40–60 cm | 20200811-1-(5)_0–60<br>cm_B_R2_SC4 | CSF21004 | <i>C. hongkongensis</i> | AA-- | L.L. Liu, J.L. Han & L.S.<br>Sun | OK167387 | OK168424 | – | – |

|    |          |                                    |          |                         |      |                                  |          |          |          |          |
|----|----------|------------------------------------|----------|-------------------------|------|----------------------------------|----------|----------|----------|----------|
| 70 | 0–20 cm  | 20200811-1-(6)_0–20<br>cm_A_R2_SC1 | CSF21005 | <i>C. hongkongensis</i> | AA-- | L.L. Liu, J.L. Han & L.S.<br>Sun | OK167388 | OK168425 | –        | –        |
| 70 | 0–20 cm  | 20200811-1-(6)_0–20<br>cm_A_R2_SC2 | CSF21006 | <i>C. hongkongensis</i> | AA-- | L.L. Liu, J.L. Han & L.S.<br>Sun | OK167389 | OK168426 | –        | –        |
| 70 | 0–20 cm  | 20200811-1-(6)_0–20<br>cm_B_R1_SC2 | CSF21007 | <i>C. hongkongensis</i> | AA-- | L.L. Liu, J.L. Han & L.S.<br>Sun | OK167390 | OK168427 | –        | –        |
| 70 | 0–20 cm  | 20200811-1-(6)_0–20<br>cm_B_R2_SC1 | CSF21008 | <i>C. aconidialis</i>   | AA-- | L.L. Liu, J.L. Han & L.S.<br>Sun | OK167816 | OK168853 | –        | –        |
| 70 | 0–20 cm  | 20200811-1-(6)_0–20<br>cm_B_R2_SC2 | CSF21009 | <i>C. aconidialis</i>   | AA-- | L.L. Liu, J.L. Han & L.S.<br>Sun | OK167817 | OK168854 | –        | –        |
| 70 | 20–40 cm | 20200811-1-(6)_0–40<br>cm_A_R1_SC1 | CSF21010 | <i>C. hongkongensis</i> | AA-- | L.L. Liu, J.L. Han & L.S.<br>Sun | OK167391 | OK168428 | –        | –        |
| 70 | 20–40 cm | 20200811-1-(6)_0–40<br>cm_A_R1_SC2 | CSF21011 | <i>C. hongkongensis</i> | AA-- | L.L. Liu, J.L. Han & L.S.<br>Sun | OK167392 | OK168429 | –        | –        |
| 70 | 20–40 cm | 20200811-1-(6)_0–40<br>cm_A_R1_SC3 | CSF21012 | <i>C. hongkongensis</i> | AA-- | L.L. Liu, J.L. Han & L.S.<br>Sun | OK167393 | OK168430 | –        | –        |
| 70 | 20–40 cm | 20200811-1-(6)_0–40<br>cm_A_R1_SC4 | CSF21013 | <i>C. hongkongensis</i> | AA-- | L.L. Liu, J.L. Han & L.S.<br>Sun | OK167394 | OK168431 | –        | –        |
| 71 | 0–20 cm  | 20200811-1-(7)_0–20<br>cm_A_R1_SC1 | CSF21014 | <i>C. hongkongensis</i> | AA-- | L.L. Liu, J.L. Han & L.S.<br>Sun | OK167395 | OK168432 | –        | –        |
| 71 | 0–20 cm  | 20200811-1-(7)_0–20<br>cm_A_R1_SC2 | CSF21015 | <i>C. hongkongensis</i> | AA-- | L.L. Liu, J.L. Han & L.S.<br>Sun | OK167396 | OK168433 | –        | –        |
| 71 | 0–20 cm  | 20200811-1-(7)_0–20<br>cm_A_R2_SC1 | CSF21016 | <i>C. hongkongensis</i> | AA-- | L.L. Liu, J.L. Han & L.S.<br>Sun | OK167397 | OK168434 | –        | –        |
| 71 | 0–20 cm  | 20200811-1-(7)_0–20<br>cm_A_R2_SC2 | CSF21017 | <i>C. hongkongensis</i> | AA-- | L.L. Liu, J.L. Han & L.S.<br>Sun | OK167398 | OK168435 | –        | –        |
| 71 | 0–20 cm  | 20200811-1-(7)_0–20<br>cm_B_R1_SC1 | CSF21018 | <i>C. hongkongensis</i> | AGAA | L.L. Liu, J.L. Han & L.S.<br>Sun | OK167644 | OK168681 | OK169131 | OK169215 |
| 71 | 0–20 cm  | 20200811-1-(7)_0–20<br>cm_B_R1_SC2 | CSF21019 | <i>C. hongkongensis</i> | AA-- | L.L. Liu, J.L. Han & L.S.<br>Sun | OK167399 | OK168436 | –        | –        |
| 71 | 0–20 cm  | 20200811-1-(7)_0–20<br>cm_B_R2_SC1 | CSF21020 | <i>C. hongkongensis</i> | AA-- | L.L. Liu, J.L. Han & L.S.<br>Sun | OK167400 | OK168437 | –        | –        |
| 71 | 0–20 cm  | 20200811-1-(7)_0–20<br>cm_B_R2_SC2 | CSF21021 | <i>C. hongkongensis</i> | AA-- | L.L. Liu, J.L. Han & L.S.<br>Sun | OK167401 | OK168438 | –        | –        |

|    |          |                                    |          |                         |      |                                  |          |          |   |   |
|----|----------|------------------------------------|----------|-------------------------|------|----------------------------------|----------|----------|---|---|
| 71 | 20–40 cm | 20200811-1-(7)_0–40<br>cm_A_R1_SC1 | CSF21022 | <i>C. hongkongensis</i> | AA-- | L.L. Liu, J.L. Han & L.S.<br>Sun | OK167402 | OK168439 | – | – |
| 71 | 20–40 cm | 20200811-1-(7)_0–40<br>cm_A_R1_SC2 | CSF21023 | <i>C. hongkongensis</i> | AA-- | L.L. Liu, J.L. Han & L.S.<br>Sun | OK167403 | OK168440 | – | – |
| 71 | 20–40 cm | 20200811-1-(7)_0–40<br>cm_A_R1_SC3 | CSF21024 | <i>C. hongkongensis</i> | AA-- | L.L. Liu, J.L. Han & L.S.<br>Sun | OK167404 | OK168441 | – | – |
| 71 | 20–40 cm | 20200811-1-(7)_0–40<br>cm_A_R1_SC4 | CSF21025 | <i>C. hongkongensis</i> | AA-- | L.L. Liu, J.L. Han & L.S.<br>Sun | OK167405 | OK168442 | – | – |
| 71 | 20–40 cm | 20200811-1-(7)_0–40<br>cm_A_R2_SC1 | CSF21026 | <i>C. hongkongensis</i> | AA-- | L.L. Liu, J.L. Han & L.S.<br>Sun | OK167406 | OK168443 | – | – |
| 71 | 20–40 cm | 20200811-1-(7)_0–40<br>cm_A_R2_SC2 | CSF21027 | <i>C. hongkongensis</i> | AA-- | L.L. Liu, J.L. Han & L.S.<br>Sun | OK167407 | OK168444 | – | – |
| 71 | 20–40 cm | 20200811-1-(7)_0–40<br>cm_A_R2_SC3 | CSF21028 | <i>C. hongkongensis</i> | AA-- | L.L. Liu, J.L. Han & L.S.<br>Sun | OK167408 | OK168445 | – | – |
| 71 | 20–40 cm | 20200811-1-(7)_0–40<br>cm_A_R2_SC4 | CSF21029 | <i>C. hongkongensis</i> | AA-- | L.L. Liu, J.L. Han & L.S.<br>Sun | OK167409 | OK168446 | – | – |
| 71 | 20–40 cm | 20200811-1-(7)_0–40<br>cm_B_R1_SC1 | CSF21030 | <i>C. hongkongensis</i> | AA-- | L.L. Liu, J.L. Han & L.S.<br>Sun | OK167410 | OK168447 | – | – |
| 71 | 20–40 cm | 20200811-1-(7)_0–40<br>cm_B_R1_SC2 | CSF21031 | <i>C. hongkongensis</i> | AA-- | L.L. Liu, J.L. Han & L.S.<br>Sun | OK167411 | OK168448 | – | – |
| 71 | 20–40 cm | 20200811-1-(7)_0–40<br>cm_B_R1_SC3 | CSF21032 | <i>C. hongkongensis</i> | AA-- | L.L. Liu, J.L. Han & L.S.<br>Sun | OK167412 | OK168449 | – | – |
| 71 | 20–40 cm | 20200811-1-(7)_0–40<br>cm_B_R1_SC4 | CSF21033 | <i>C. hongkongensis</i> | AA-- | L.L. Liu, J.L. Han & L.S.<br>Sun | OK167413 | OK168450 | – | – |
| 72 | 0–20 cm  | 20200811-1-(8)_0–20<br>cm_A_R1_SC1 | CSF21034 | <i>C. hongkongensis</i> | AA-- | L.L. Liu, J.L. Han & L.S.<br>Sun | OK167414 | OK168451 | – | – |
| 72 | 0–20 cm  | 20200811-1-(8)_0–20<br>cm_A_R1_SC2 | CSF21035 | <i>C. hongkongensis</i> | AA-- | L.L. Liu, J.L. Han & L.S.<br>Sun | OK167415 | OK168452 | – | – |
| 72 | 20–40 cm | 20200811-1-(8)_0–40<br>cm_A_R1_SC1 | CSF21036 | <i>C. kyotensis</i>     | AA-- | L.L. Liu, J.L. Han & L.S.<br>Sun | OK167964 | OK169001 | – | – |
| 72 | 20–40 cm | 20200811-1-(8)_0–40<br>cm_A_R1_SC2 | CSF21037 | <i>C. kyotensis</i>     | AA-- | L.L. Liu, J.L. Han & L.S.<br>Sun | OK167965 | OK169002 | – | – |
| 72 | 20–40 cm | 20200811-1-(8)_0–40<br>cm_A_R1_SC3 | CSF21038 | <i>C. kyotensis</i>     | AA-- | L.L. Liu, J.L. Han & L.S.<br>Sun | OK167966 | OK169003 | – | – |

|    |          |                                    |          |                         |      |                                  |          |          |          |          |
|----|----------|------------------------------------|----------|-------------------------|------|----------------------------------|----------|----------|----------|----------|
| 72 | 20–40 cm | 20200811-1-(8)_0–40<br>cm_A_R1_SC4 | CSF21039 | <i>C. kyotensis</i>     | AA-- | L.L. Liu, J.L. Han & L.S.<br>Sun | OK167967 | OK169004 | –        | –        |
| 72 | 20–40 cm | 20200811-1-(8)_0–40<br>cm_B_R2_SC1 | CSF21040 | <i>C. hongkongensis</i> | AA-- | L.L. Liu, J.L. Han & L.S.<br>Sun | OK167416 | OK168453 | –        | –        |
| 72 | 20–40 cm | 20200811-1-(8)_0–40<br>cm_B_R2_SC2 | CSF21041 | <i>C. hongkongensis</i> | AA-- | L.L. Liu, J.L. Han & L.S.<br>Sun | OK167417 | OK168454 | –        | –        |
| 72 | 20–40 cm | 20200811-1-(8)_0–40<br>cm_B_R2_SC3 | CSF21042 | <i>C. hongkongensis</i> | AA-- | L.L. Liu, J.L. Han & L.S.<br>Sun | OK167418 | OK168455 | –        | –        |
| 72 | 20–40 cm | 20200811-1-(8)_0–40<br>cm_B_R2_SC4 | CSF21043 | <i>C. hongkongensis</i> | AA-- | L.L. Liu, J.L. Han & L.S.<br>Sun | OK167419 | OK168456 | –        | –        |
| 73 | 0–20 cm  | 20200812-1-(1)_0–20<br>cm_A_R2_SC1 | CSF21044 | <i>C. aconidialis</i>   | AC-- | L.L. Liu, J.L. Han & L.S.<br>Sun | OK167937 | OK168974 | –        | –        |
| 73 | 0–20 cm  | 20200812-1-(1)_0–20<br>cm_A_R2_SC2 | CSF21045 | <i>C. aconidialis</i>   | AC-- | L.L. Liu, J.L. Han & L.S.<br>Sun | OK167938 | OK168975 | –        | –        |
| 73 | 0–20 cm  | 20200812-1-(1)_0–20<br>cm_B_R1_SC1 | CSF21046 | <i>C. hongkongensis</i> | AA-- | L.L. Liu, J.L. Han & L.S.<br>Sun | OK167420 | OK168457 | –        | –        |
| 73 | 0–20 cm  | 20200812-1-(1)_0–20<br>cm_B_R1_SC2 | CSF21047 | <i>C. hongkongensis</i> | AA-- | L.L. Liu, J.L. Han & L.S.<br>Sun | OK167421 | OK168458 | –        | –        |
| 73 | 20–40 cm | 20200812-1-(1)_0–40<br>cm_A_R2_SC1 | CSF21048 | <i>C. hongkongensis</i> | AA-- | L.L. Liu, J.L. Han & L.S.<br>Sun | OK167422 | OK168459 | –        | –        |
| 73 | 20–40 cm | 20200812-1-(1)_0–40<br>cm_A_R2_SC2 | CSF21049 | <i>C. hongkongensis</i> | AA-- | L.L. Liu, J.L. Han & L.S.<br>Sun | OK167423 | OK168460 | –        | –        |
| 73 | 20–40 cm | 20200812-1-(1)_0–40<br>cm_A_R2_SC3 | CSF21050 | <i>C. hongkongensis</i> | AA-- | L.L. Liu, J.L. Han & L.S.<br>Sun | OK167424 | OK168461 | –        | –        |
| 73 | 20–40 cm | 20200812-1-(1)_0–40<br>cm_A_R2_SC4 | CSF21051 | <i>C. hongkongensis</i> | AA-- | L.L. Liu, J.L. Han & L.S.<br>Sun | OK167425 | OK168462 | –        | –        |
| 74 | 0–20 cm  | 20200812-1-(2)_0–20<br>cm_A_R1_SC1 | CSF21052 | <i>C. ilicicola</i>     | BBBA | L.L. Liu, J.L. Han & L.S.<br>Sun | OK168044 | OK169081 | OK169181 | OK169265 |
| 74 | 0–20 cm  | 20200812-1-(2)_0–20<br>cm_A_R1_SC2 | CSF21053 | <i>C. hongkongensis</i> | AA-- | L.L. Liu, J.L. Han & L.S.<br>Sun | OK167426 | OK168463 | –        | –        |
| 74 | 0–20 cm  | 20200812-1-(2)_0–20<br>cm_A_R2_SC1 | CSF21054 | <i>C. hongkongensis</i> | AA-- | L.L. Liu, J.L. Han & L.S.<br>Sun | OK167427 | OK168464 | –        | –        |
| 74 | 0–20 cm  | 20200812-1-(2)_0–20<br>cm_A_R2_SC2 | CSF21055 | <i>C. ilicicola</i>     | BB-- | L.L. Liu, J.L. Han & L.S.<br>Sun | OK168045 | OK169082 | –        | –        |

|    |          |                                    |          |                         |      |                                  |          |          |   |   |
|----|----------|------------------------------------|----------|-------------------------|------|----------------------------------|----------|----------|---|---|
| 74 | 0–20 cm  | 20200812-1-(2)_0–20<br>cm_B_R1_SC1 | CSF21056 | <i>C. ilicicola</i>     | BB-- | L.L. Liu, J.L. Han & L.S.<br>Sun | OK168046 | OK169083 | – | – |
| 74 | 0–20 cm  | 20200812-1-(2)_0–20<br>cm_B_R1_SC2 | CSF21057 | <i>C. hongkongensis</i> | AA-- | L.L. Liu, J.L. Han & L.S.<br>Sun | OK167428 | OK168465 | – | – |
| 74 | 0–20 cm  | 20200812-1-(2)_0–20<br>cm_B_R2_SC1 | CSF21058 | <i>C. hongkongensis</i> | AA-- | L.L. Liu, J.L. Han & L.S.<br>Sun | OK167429 | OK168466 | – | – |
| 74 | 0–20 cm  | 20200812-1-(2)_0–20<br>cm_B_R2_SC2 | CSF21059 | <i>C. hongkongensis</i> | AA-- | L.L. Liu, J.L. Han & L.S.<br>Sun | OK167430 | OK168467 | – | – |
| 75 | 0–20 cm  | 20200812-1-(3)_0–20<br>cm_A_R1_SC1 | CSF21060 | <i>C. kyotensis</i>     | AA-- | L.L. Liu, J.L. Han & L.S.<br>Sun | OK167968 | OK169005 | – | – |
| 75 | 0–20 cm  | 20200812-1-(3)_0–20<br>cm_A_R1_SC2 | CSF21061 | <i>C. kyotensis</i>     | AA-- | L.L. Liu, J.L. Han & L.S.<br>Sun | OK167969 | OK169006 | – | – |
| 75 | 0–20 cm  | 20200812-1-(3)_0–20<br>cm_A_R2_SC1 | CSF21062 | <i>C. kyotensis</i>     | AA-- | L.L. Liu, J.L. Han & L.S.<br>Sun | OK167970 | OK169007 | – | – |
| 75 | 0–20 cm  | 20200812-1-(3)_0–20<br>cm_A_R2_SC2 | CSF21063 | <i>C. hongkongensis</i> | AA-- | L.L. Liu, J.L. Han & L.S.<br>Sun | OK167431 | OK168468 | – | – |
| 75 | 0–20 cm  | 20200812-1-(3)_0–20<br>cm_B_R1_SC1 | CSF21064 | <i>C. kyotensis</i>     | AA-- | L.L. Liu, J.L. Han & L.S.<br>Sun | OK167971 | OK169008 | – | – |
| 75 | 0–20 cm  | 20200812-1-(3)_0–20<br>cm_B_R1_SC2 | CSF21065 | <i>C. kyotensis</i>     | AA-- | L.L. Liu, J.L. Han & L.S.<br>Sun | OK167972 | OK169009 | – | – |
| 75 | 0–20 cm  | 20200812-1-(3)_0–20<br>cm_B_R2_SC1 | CSF21066 | <i>C. hongkongensis</i> | AA-- | L.L. Liu, J.L. Han & L.S.<br>Sun | OK167432 | OK168469 | – | – |
| 75 | 0–20 cm  | 20200812-1-(3)_0–20<br>cm_B_R2_SC2 | CSF21067 | <i>C. hongkongensis</i> | AA-- | L.L. Liu, J.L. Han & L.S.<br>Sun | OK167433 | OK168470 | – | – |
| 75 | 60–80 cm | 20200812-1-(3)_0–80<br>cm_A_R2_SC1 | CSF21068 | <i>C. kyotensis</i>     | AB-- | L.L. Liu, J.L. Han & L.S.<br>Sun | OK167994 | OK169031 | – | – |
| 75 | 60–80 cm | 20200812-1-(3)_0–80<br>cm_A_R2_SC2 | CSF21069 | <i>C. kyotensis</i>     | AB-- | L.L. Liu, J.L. Han & L.S.<br>Sun | OK167995 | OK169032 | – | – |
| 75 | 60–80 cm | 20200812-1-(3)_0–80<br>cm_A_R2_SC3 | CSF21070 | <i>C. kyotensis</i>     | AB-- | L.L. Liu, J.L. Han & L.S.<br>Sun | OK167996 | OK169033 | – | – |
| 75 | 60–80 cm | 20200812-1-(3)_0–80<br>cm_A_R2_SC4 | CSF21071 | <i>C. kyotensis</i>     | AB-- | L.L. Liu, J.L. Han & L.S.<br>Sun | OK167997 | OK169034 | – | – |
| 76 | 0–20 cm  | 20200812-1-(4)_0–20<br>cm_A_R1_SC1 | CSF21076 | <i>C. hongkongensis</i> | AA-- | L.L. Liu, J.L. Han & L.S.<br>Sun | OK167434 | OK168471 | – | – |

|    |          |                                    |          |                         |      |                                  |          |          |   |   |
|----|----------|------------------------------------|----------|-------------------------|------|----------------------------------|----------|----------|---|---|
| 76 | 0–20 cm  | 20200812-1-(4)_0–20<br>cm_A_R1_SC2 | CSF21077 | <i>C. hongkongensis</i> | AA-- | L.L. Liu, J.L. Han & L.S.<br>Sun | OK167435 | OK168472 | – | – |
| 76 | 0–20 cm  | 20200812-1-(4)_0–20<br>cm_A_R2_SC1 | CSF21078 | <i>C. hongkongensis</i> | AA-- | L.L. Liu, J.L. Han & L.S.<br>Sun | OK167436 | OK168473 | – | – |
| 76 | 0–20 cm  | 20200812-1-(4)_0–20<br>cm_A_R2_SC2 | CSF21079 | <i>C. aconidialis</i>   | AA-- | L.L. Liu, J.L. Han & L.S.<br>Sun | OK167818 | OK168855 | – | – |
| 76 | 0–20 cm  | 20200812-1-(4)_0–20<br>cm_B_R2_SC1 | CSF21080 | <i>C. aconidialis</i>   | AA-- | L.L. Liu, J.L. Han & L.S.<br>Sun | OK167819 | OK168856 | – | – |
| 76 | 0–20 cm  | 20200812-1-(4)_0–20<br>cm_B_R2_SC2 | CSF21081 | <i>C. kyotensis</i>     | AA-- | L.L. Liu, J.L. Han & L.S.<br>Sun | OK167973 | OK169010 | – | – |
| 76 | 20–40 cm | 20200812-1-(4)_0–40<br>cm_A_R1_SC1 | CSF21082 | <i>C. hongkongensis</i> | AA-- | L.L. Liu, J.L. Han & L.S.<br>Sun | OK167437 | OK168474 | – | – |
| 76 | 20–40 cm | 20200812-1-(4)_0–40<br>cm_A_R1_SC2 | CSF21083 | <i>C. hongkongensis</i> | AA-- | L.L. Liu, J.L. Han & L.S.<br>Sun | OK167438 | OK168475 | – | – |
| 76 | 20–40 cm | 20200812-1-(4)_0–40<br>cm_A_R1_SC3 | CSF21084 | <i>C. hongkongensis</i> | AA-- | L.L. Liu, J.L. Han & L.S.<br>Sun | OK167439 | OK168476 | – | – |
| 76 | 20–40 cm | 20200812-1-(4)_0–40<br>cm_A_R1_SC4 | CSF21085 | <i>C. hongkongensis</i> | AA-- | L.L. Liu, J.L. Han & L.S.<br>Sun | OK167440 | OK168477 | – | – |
| 76 | 20–40 cm | 20200812-1-(4)_0–40<br>cm_B_R2_SC1 | CSF21086 | <i>C. hongkongensis</i> | AA-- | L.L. Liu, J.L. Han & L.S.<br>Sun | OK167441 | OK168478 | – | – |
| 76 | 20–40 cm | 20200812-1-(4)_0–40<br>cm_B_R2_SC2 | CSF21087 | <i>C. hongkongensis</i> | AA-- | L.L. Liu, J.L. Han & L.S.<br>Sun | OK167442 | OK168479 | – | – |
| 76 | 20–40 cm | 20200812-1-(4)_0–40<br>cm_B_R2_SC3 | CSF21088 | <i>C. hongkongensis</i> | AA-- | L.L. Liu, J.L. Han & L.S.<br>Sun | OK167443 | OK168480 | – | – |
| 76 | 20–40 cm | 20200812-1-(4)_0–40<br>cm_B_R2_SC4 | CSF21089 | <i>C. hongkongensis</i> | AA-- | L.L. Liu, J.L. Han & L.S.<br>Sun | OK167444 | OK168481 | – | – |
| 76 | 40–60 cm | 20200812-1-(4)_0–60<br>cm_A_R2_SC1 | CSF21090 | <i>C. hongkongensis</i> | AF-- | L.L. Liu, J.L. Han & L.S.<br>Sun | OK167622 | OK168659 | – | – |
| 76 | 40–60 cm | 20200812-1-(4)_0–60<br>cm_A_R2_SC2 | CSF21091 | <i>C. hongkongensis</i> | AF-- | L.L. Liu, J.L. Han & L.S.<br>Sun | OK167623 | OK168660 | – | – |
| 76 | 40–60 cm | 20200812-1-(4)_0–60<br>cm_A_R2_SC3 | CSF21092 | <i>C. hongkongensis</i> | AF-- | L.L. Liu, J.L. Han & L.S.<br>Sun | OK167624 | OK168661 | – | – |
| 77 | 0–20 cm  | 20200812-1-(5)_0–20<br>cm_A_R1_SC1 | CSF21093 | <i>C. aconidialis</i>   | AA-- | L.L. Liu, J.L. Han & L.S.<br>Sun | OK167820 | OK168857 | – | – |

|    |          |                                    |          |                         |      |                                  |          |          |   |   |
|----|----------|------------------------------------|----------|-------------------------|------|----------------------------------|----------|----------|---|---|
| 77 | 0–20 cm  | 20200812-1-(5)_0–20<br>cm_A_R1_SC2 | CSF21094 | <i>C. aconidialis</i>   | AA-- | L.L. Liu, J.L. Han & L.S.<br>Sun | OK167821 | OK168858 | – | – |
| 77 | 0–20 cm  | 20200812-1-(5)_0–20<br>cm_A_R2_SC1 | CSF21095 | <i>C. aconidialis</i>   | AA-- | L.L. Liu, J.L. Han & L.S.<br>Sun | OK167822 | OK168859 | – | – |
| 77 | 0–20 cm  | 20200812-1-(5)_0–20<br>cm_A_R2_SC2 | CSF21096 | <i>C. aconidialis</i>   | AA-- | L.L. Liu, J.L. Han & L.S.<br>Sun | OK167823 | OK168860 | – | – |
| 77 | 0–20 cm  | 20200812-1-(5)_0–20<br>cm_B_R1_SC1 | CSF21097 | <i>C. aconidialis</i>   | AA-- | L.L. Liu, J.L. Han & L.S.<br>Sun | OK167824 | OK168861 | – | – |
| 77 | 0–20 cm  | 20200812-1-(5)_0–20<br>cm_B_R1_SC2 | CSF21098 | <i>C. hongkongensis</i> | AA-- | L.L. Liu, J.L. Han & L.S.<br>Sun | OK167445 | OK168482 | – | – |
| 77 | 0–20 cm  | 20200812-1-(5)_0–20<br>cm_B_R2_SC1 | CSF21099 | <i>C. hongkongensis</i> | AA-- | L.L. Liu, J.L. Han & L.S.<br>Sun | OK167446 | OK168483 | – | – |
| 77 | 0–20 cm  | 20200812-1-(5)_0–20<br>cm_B_R2_SC2 | CSF21100 | <i>C. aconidialis</i>   | AA-- | L.L. Liu, J.L. Han & L.S.<br>Sun | OK167825 | OK168862 | – | – |
| 77 | 20–40 cm | 20200812-1-(5)_0–40<br>cm_B_R1_SC1 | CSF21101 | <i>C. hongkongensis</i> | AA-- | L.L. Liu, J.L. Han & L.S.<br>Sun | OK167447 | OK168484 | – | – |
| 77 | 20–40 cm | 20200812-1-(5)_0–40<br>cm_B_R1_SC2 | CSF21102 | <i>C. hongkongensis</i> | AA-- | L.L. Liu, J.L. Han & L.S.<br>Sun | OK167448 | OK168485 | – | – |
| 77 | 20–40 cm | 20200812-1-(5)_0–40<br>cm_B_R1_SC3 | CSF21103 | <i>C. hongkongensis</i> | AA-- | L.L. Liu, J.L. Han & L.S.<br>Sun | OK167449 | OK168486 | – | – |
| 77 | 20–40 cm | 20200812-1-(5)_0–40<br>cm_B_R1_SC4 | CSF21104 | <i>C. hongkongensis</i> | AA-- | L.L. Liu, J.L. Han & L.S.<br>Sun | OK167450 | OK168487 | – | – |
| 78 | 0–20 cm  | 20200812-1-(6)_0–20<br>cm_A_R1_SC1 | CSF21105 | <i>C. hongkongensis</i> | AA-- | L.L. Liu, J.L. Han & L.S.<br>Sun | OK167451 | OK168488 | – | – |
| 78 | 0–20 cm  | 20200812-1-(6)_0–20<br>cm_A_R1_SC2 | CSF21106 | <i>C. hongkongensis</i> | AA-- | L.L. Liu, J.L. Han & L.S.<br>Sun | OK167452 | OK168489 | – | – |
| 78 | 0–20 cm  | 20200812-1-(6)_0–20<br>cm_A_R2_SC1 | CSF21107 | <i>C. aconidialis</i>   | AA-- | L.L. Liu, J.L. Han & L.S.<br>Sun | OK167826 | OK168863 | – | – |
| 78 | 0–20 cm  | 20200812-1-(6)_0–20<br>cm_A_R2_SC2 | CSF21108 | <i>C. aconidialis</i>   | AA-- | L.L. Liu, J.L. Han & L.S.<br>Sun | OK167827 | OK168864 | – | – |
| 78 | 0–20 cm  | 20200812-1-(6)_0–20<br>cm_B_R1_SC1 | CSF21109 | <i>C. aconidialis</i>   | AA-- | L.L. Liu, J.L. Han & L.S.<br>Sun | OK167828 | OK168865 | – | – |
| 78 | 0–20 cm  | 20200812-1-(6)_0–20<br>cm_B_R1_SC2 | CSF21110 | <i>C. aconidialis</i>   | AA-- | L.L. Liu, J.L. Han & L.S.<br>Sun | OK167829 | OK168866 | – | – |

|    |          |                                    |          |                         |      |                                  |          |          |          |          |
|----|----------|------------------------------------|----------|-------------------------|------|----------------------------------|----------|----------|----------|----------|
| 78 | 0–20 cm  | 20200812-1-(6)_0–20<br>cm_B_R2_SC1 | CSF21111 | <i>C. kyotensis</i>     | BAAA | L.L. Liu, J.L. Han & L.S.<br>Sun | OK168006 | OK169043 | OK169170 | OK169254 |
| 79 | 0–20 cm  | 20200812-1-(7)_0–20<br>cm_B_R1_SC1 | CSF21112 | <i>C. hongkongensis</i> | AA-- | L.L. Liu, J.L. Han & L.S.<br>Sun | OK167453 | OK168490 | –        | –        |
| 79 | 0–20 cm  | 20200812-1-(7)_0–20<br>cm_B_R1_SC2 | CSF21113 | <i>C. hongkongensis</i> | AA-- | L.L. Liu, J.L. Han & L.S.<br>Sun | OK167454 | OK168491 | –        | –        |
| 79 | 0–20 cm  | 20200812-1-(7)_0–20<br>cm_B_R2_SC1 | CSF21114 | <i>C. hongkongensis</i> | AA-- | L.L. Liu, J.L. Han & L.S.<br>Sun | OK167455 | OK168492 | –        | –        |
| 79 | 0–20 cm  | 20200812-1-(7)_0–20<br>cm_B_R2_SC2 | CSF21115 | <i>C. hongkongensis</i> | AA-- | L.L. Liu, J.L. Han & L.S.<br>Sun | OK167456 | OK168493 | –        | –        |
| 79 | 20–40 cm | 20200812-1-(7)_0–40<br>cm_B_R2_SC2 | CSF21117 | <i>C. hongkongensis</i> | AA-- | L.L. Liu, J.L. Han & L.S.<br>Sun | OK167457 | OK168494 | –        | –        |
| 79 | 20–40 cm | 20200812-1-(7)_0–40<br>cm_B_R2_SC3 | CSF21118 | <i>C. hongkongensis</i> | AA-- | L.L. Liu, J.L. Han & L.S.<br>Sun | OK167458 | OK168495 | –        | –        |
| 79 | 20–40 cm | 20200812-1-(7)_0–40<br>cm_B_R2_SC4 | CSF21119 | <i>C. hongkongensis</i> | AA-- | L.L. Liu, J.L. Han & L.S.<br>Sun | OK167459 | OK168496 | –        | –        |
| 80 | 0–20 cm  | 20200812-1-(8)_0–20<br>cm_A_R1_SC1 | CSF21120 | <i>C. hongkongensis</i> | AA-- | L.L. Liu, J.L. Han & L.S.<br>Sun | OK167460 | OK168497 | –        | –        |
| 80 | 0–20 cm  | 20200812-1-(8)_0–20<br>cm_A_R1_SC2 | CSF21121 | <i>C. hongkongensis</i> | AA-- | L.L. Liu, J.L. Han & L.S.<br>Sun | OK167461 | OK168498 | –        | –        |
| 80 | 0–20 cm  | 20200812-1-(8)_0–20<br>cm_B_R1_SC1 | CSF21122 | <i>C. hongkongensis</i> | AA-- | L.L. Liu, J.L. Han & L.S.<br>Sun | OK167462 | OK168499 | –        | –        |
| 80 | 0–20 cm  | 20200812-1-(8)_0–20<br>cm_B_R1_SC2 | CSF21123 | <i>C. hongkongensis</i> | AA-- | L.L. Liu, J.L. Han & L.S.<br>Sun | OK167463 | OK168500 | –        | –        |
| 80 | 0–20 cm  | 20200812-1-(8)_0–20<br>cm_B_R2_SC1 | CSF21124 | <i>C. hongkongensis</i> | AA-- | L.L. Liu, J.L. Han & L.S.<br>Sun | OK167464 | OK168501 | –        | –        |
| 80 | 0–20 cm  | 20200812-1-(8)_0–20<br>cm_B_R2_SC2 | CSF21125 | <i>C. hongkongensis</i> | AA-- | L.L. Liu, J.L. Han & L.S.<br>Sun | OK167465 | OK168502 | –        | –        |
| 80 | 20–40 cm | 20200812-1-(8)_0–40<br>cm_A_R2_SC1 | CSF21126 | <i>C. ilicicola</i>     | AAAB | L.L. Liu, J.L. Han & L.S.<br>Sun | OK168010 | OK169047 | OK169173 | OK169257 |
| 80 | 20–40 cm | 20200812-1-(8)_0–40<br>cm_A_R2_SC2 | CSF21127 | <i>C. ilicicola</i>     | AA-- | L.L. Liu, J.L. Han & L.S.<br>Sun | OK168011 | OK169048 | –        | –        |
| 80 | 20–40 cm | 20200812-1-(8)_0–40<br>cm_A_R2_SC3 | CSF21128 | <i>C. ilicicola</i>     | AA-- | L.L. Liu, J.L. Han & L.S.<br>Sun | OK168012 | OK169049 | –        | –        |



|    |          |                                    |          |                         |      |                                  |          |          |   |   |
|----|----------|------------------------------------|----------|-------------------------|------|----------------------------------|----------|----------|---|---|
| 80 | 20–40 cm | 20200812-1-(8)_0–40<br>cm_A_R2_SC4 | CSF21129 | <i>C. ilicicola</i>     | AA-- | L.L. Liu, J.L. Han & L.S.<br>Sun | OK168013 | OK169050 | – | – |
| 81 | 0–20 cm  | 20200813-1-(1)_0–20<br>cm_A_R1_SC1 | CSF21130 | <i>C. hongkongensis</i> | DA-- | L.L. Liu, J.L. Han & L.S.<br>Sun | OK167694 | OK168731 | – | – |
| 81 | 0–20 cm  | 20200813-1-(1)_0–20<br>cm_A_R1_SC2 | CSF21131 | <i>C. hongkongensis</i> | AA-- | L.L. Liu, J.L. Han & L.S.<br>Sun | OK167466 | OK168503 | – | – |
| 81 | 0–20 cm  | 20200813-1-(1)_0–20<br>cm_A_R2_SC1 | CSF21132 | <i>C. hongkongensis</i> | AA-- | L.L. Liu, J.L. Han & L.S.<br>Sun | OK167467 | OK168504 | – | – |
| 81 | 0–20 cm  | 20200813-1-(1)_0–20<br>cm_A_R2_SC2 | CSF21133 | <i>C. hongkongensis</i> | AA-- | L.L. Liu, J.L. Han & L.S.<br>Sun | OK167468 | OK168505 | – | – |
| 81 | 0–20 cm  | 20200813-1-(1)_0–20<br>cm_B_R1_SC1 | CSF21134 | <i>C. hongkongensis</i> | AA-- | L.L. Liu, J.L. Han & L.S.<br>Sun | OK167469 | OK168506 | – | – |
| 81 | 0–20 cm  | 20200813-1-(1)_0–20<br>cm_B_R1_SC2 | CSF21135 | <i>C. hongkongensis</i> | AA-- | L.L. Liu, J.L. Han & L.S.<br>Sun | OK167470 | OK168507 | – | – |
| 81 | 0–20 cm  | 20200813-1-(1)_0–20<br>cm_B_R2_SC1 | CSF21136 | <i>C. aconidialis</i>   | AA-- | L.L. Liu, J.L. Han & L.S.<br>Sun | OK167830 | OK168867 | – | – |
| 81 | 20–40 cm | 20200813-1-(1)_0–40<br>cm_A_R2_SC1 | CSF21138 | <i>C. kyotensis</i>     | AA-- | L.L. Liu, J.L. Han & L.S.<br>Sun | OK167974 | OK169011 | – | – |
| 81 | 20–40 cm | 20200813-1-(1)_0–40<br>cm_A_R2_SC2 | CSF21139 | <i>C. kyotensis</i>     | AA-- | L.L. Liu, J.L. Han & L.S.<br>Sun | OK167975 | OK169012 | – | – |
| 81 | 20–40 cm | 20200813-1-(1)_0–40<br>cm_A_R2_SC3 | CSF21140 | <i>C. kyotensis</i>     | AA-- | L.L. Liu, J.L. Han & L.S.<br>Sun | OK167976 | OK169013 | – | – |
| 81 | 20–40 cm | 20200813-1-(1)_0–40<br>cm_A_R2_SC4 | CSF21141 | <i>C. kyotensis</i>     | AA-- | L.L. Liu, J.L. Han & L.S.<br>Sun | OK167977 | OK169014 | – | – |
| 81 | 20–40 cm | 20200813-1-(1)_0–40<br>cm_B_R1_SC1 | CSF21142 | <i>C. hongkongensis</i> | AA-- | L.L. Liu, J.L. Han & L.S.<br>Sun | OK167471 | OK168508 | – | – |
| 81 | 20–40 cm | 20200813-1-(1)_0–40<br>cm_B_R1_SC2 | CSF21143 | <i>C. hongkongensis</i> | AA-- | L.L. Liu, J.L. Han & L.S.<br>Sun | OK167472 | OK168509 | – | – |
| 81 | 20–40 cm | 20200813-1-(1)_0–40<br>cm_B_R1_SC3 | CSF21144 | <i>C. hongkongensis</i> | DA-- | L.L. Liu, J.L. Han & L.S.<br>Sun | OK167695 | OK168732 | – | – |
| 81 | 20–40 cm | 20200813-1-(1)_0–40<br>cm_B_R1_SC4 | CSF21145 | <i>C. hongkongensis</i> | AA-- | L.L. Liu, J.L. Han & L.S.<br>Sun | OK167473 | OK168510 | – | – |
| 81 | 20–40 cm | 20200813-1-(1)_0–40<br>cm_B_R2_SC1 | CSF21146 | <i>C. hongkongensis</i> | AA-- | L.L. Liu, J.L. Han & L.S.<br>Sun | OK167474 | OK168511 | – | – |

|    |          |                                    |          |                         |      |                                  |          |          |          |          |
|----|----------|------------------------------------|----------|-------------------------|------|----------------------------------|----------|----------|----------|----------|
| 81 | 20–40 cm | 20200813-1-(1)_0–40<br>cm_B_R2_SC2 | CSF21147 | <i>C. hongkongensis</i> | AA-- | L.L. Liu, J.L. Han & L.S.<br>Sun | OK167475 | OK168512 | –        | –        |
| 81 | 20–40 cm | 20200813-1-(1)_0–40<br>cm_B_R2_SC3 | CSF21148 | <i>C. hongkongensis</i> | AA-- | L.L. Liu, J.L. Han & L.S.<br>Sun | OK167476 | OK168513 | –        | –        |
| 81 | 20–40 cm | 20200813-1-(1)_0–40<br>cm_B_R2_SC4 | CSF21149 | <i>C. hongkongensis</i> | AA-- | L.L. Liu, J.L. Han & L.S.<br>Sun | OK167477 | OK168514 | –        | –        |
| 82 | 0–20 cm  | 20200813-1-(2)_0–20<br>cm_A_R1_SC1 | CSF21150 | <i>C. hongkongensis</i> | AA-- | L.L. Liu, J.L. Han & L.S.<br>Sun | OK167478 | OK168515 | –        | –        |
| 82 | 0–20 cm  | 20200813-1-(2)_0–20<br>cm_A_R1_SC2 | CSF21151 | <i>C. hongkongensis</i> | AA-- | L.L. Liu, J.L. Han & L.S.<br>Sun | OK167479 | OK168516 | –        | –        |
| 82 | 0–20 cm  | 20200813-1-(2)_0–20<br>cm_A_R2_SC2 | CSF21152 | <i>C. hongkongensis</i> | AA-- | L.L. Liu, J.L. Han & L.S.<br>Sun | OK167480 | OK168517 | –        | –        |
| 82 | 0–20 cm  | 20200813-1-(2)_0–20<br>cm_B_R1_SC1 | CSF21153 | <i>C. hongkongensis</i> | AA-- | L.L. Liu, J.L. Han & L.S.<br>Sun | OK167481 | OK168518 | –        | –        |
| 82 | 0–20 cm  | 20200813-1-(2)_0–20<br>cm_B_R1_SC2 | CSF21154 | <i>C. hongkongensis</i> | AA-- | L.L. Liu, J.L. Han & L.S.<br>Sun | OK167482 | OK168519 | –        | –        |
| 82 | 0–20 cm  | 20200813-1-(2)_0–20<br>cm_B_R2_SC1 | CSF21155 | <i>C. hongkongensis</i> | AHAA | L.L. Liu, J.L. Han & L.S.<br>Sun | OK167647 | OK168684 | OK169134 | OK169218 |
| 82 | 0–20 cm  | 20200813-1-(2)_0–20<br>cm_B_R2_SC2 | CSF21156 | <i>C. hongkongensis</i> | AHAA | L.L. Liu, J.L. Han & L.S.<br>Sun | OK167648 | OK168685 | OK169135 | OK169219 |
| 83 | 0–20 cm  | 20200813-1-(3)_0–20<br>cm_B_R1_SC1 | CSF21157 | <i>C. hongkongensis</i> | AA-- | L.L. Liu, J.L. Han & L.S.<br>Sun | OK167483 | OK168520 | –        | –        |
| 83 | 0–20 cm  | 20200813-1-(3)_0–20<br>cm_B_R1_SC2 | CSF21158 | <i>C. kyotensis</i>     | AA-- | L.L. Liu, J.L. Han & L.S.<br>Sun | OK167978 | OK169015 | –        | –        |
| 84 | 0–20 cm  | 20200813-1-(4)_0–20<br>cm_A_R1_SC1 | CSF21159 | <i>C. hongkongensis</i> | AA-- | L.L. Liu, J.L. Han & L.S.<br>Sun | OK167484 | OK168521 | –        | –        |
| 84 | 0–20 cm  | 20200813-1-(4)_0–20<br>cm_A_R1_SC2 | CSF21160 | <i>C. hongkongensis</i> | AA-- | L.L. Liu, J.L. Han & L.S.<br>Sun | OK167485 | OK168522 | –        | –        |
| 84 | 0–20 cm  | 20200813-1-(4)_0–20<br>cm_A_R2_SC1 | CSF21161 | <i>C. hongkongensis</i> | AA-- | L.L. Liu, J.L. Han & L.S.<br>Sun | OK167486 | OK168523 | –        | –        |
| 84 | 0–20 cm  | 20200813-1-(4)_0–20<br>cm_A_R2_SC2 | CSF21162 | <i>C. hongkongensis</i> | AA-- | L.L. Liu, J.L. Han & L.S.<br>Sun | OK167487 | OK168524 | –        | –        |
| 84 | 0–20 cm  | 20200813-1-(4)_0–20<br>cm_B_R1_SC1 | CSF21163 | <i>C. hongkongensis</i> | AA-- | L.L. Liu, J.L. Han & L.S.<br>Sun | OK167488 | OK168525 | –        | –        |

|    |          |                                    |          |                         |      |                                  |          |          |   |   |
|----|----------|------------------------------------|----------|-------------------------|------|----------------------------------|----------|----------|---|---|
| 84 | 0–20 cm  | 20200813-1-(4)_0–20<br>cm_B_R1_SC2 | CSF21164 | <i>C. hongkongensis</i> | AA-- | L.L. Liu, J.L. Han & L.S.<br>Sun | OK167489 | OK168526 | – | – |
| 84 | 0–20 cm  | 20200813-1-(4)_0–20<br>cm_B_R2_SC1 | CSF21165 | <i>C. hongkongensis</i> | AA-- | L.L. Liu, J.L. Han & L.S.<br>Sun | OK167490 | OK168527 | – | – |
| 84 | 0–20 cm  | 20200813-1-(4)_0–20<br>cm_B_R2_SC2 | CSF21166 | <i>C. hongkongensis</i> | AA-- | L.L. Liu, J.L. Han & L.S.<br>Sun | OK167491 | OK168528 | – | – |
| 84 | 20–40 cm | 20200813-1-(4)_0–40<br>cm_B_R2_SC1 | CSF21167 | <i>C. hongkongensis</i> | AF-- | L.L. Liu, J.L. Han & L.S.<br>Sun | OK167625 | OK168662 | – | – |
| 84 | 20–40 cm | 20200813-1-(4)_0–40<br>cm_B_R2_SC2 | CSF21168 | <i>C. hongkongensis</i> | AF-- | L.L. Liu, J.L. Han & L.S.<br>Sun | OK167626 | OK168663 | – | – |
| 84 | 20–40 cm | 20200813-1-(4)_0–40<br>cm_B_R2_SC3 | CSF21169 | <i>C. hongkongensis</i> | AF-- | L.L. Liu, J.L. Han & L.S.<br>Sun | OK167627 | OK168664 | – | – |
| 84 | 20–40 cm | 20200813-1-(4)_0–40<br>cm_B_R2_SC4 | CSF21170 | <i>C. hongkongensis</i> | AF-- | L.L. Liu, J.L. Han & L.S.<br>Sun | OK167628 | OK168665 | – | – |
| 85 | 0–20 cm  | 20200814-1-(1)_0–20<br>cm_A_R1_SC1 | CSF21171 | <i>C. hongkongensis</i> | AA-- | L.L. Liu, J.L. Han & L.S.<br>Sun | OK167492 | OK168529 | – | – |
| 85 | 0–20 cm  | 20200814-1-(1)_0–20<br>cm_A_R1_SC2 | CSF21172 | <i>C. hongkongensis</i> | AA-- | L.L. Liu, J.L. Han & L.S.<br>Sun | OK167493 | OK168530 | – | – |
| 85 | 0–20 cm  | 20200814-1-(1)_0–20<br>cm_A_R2_SC1 | CSF21173 | <i>C. hongkongensis</i> | AA-- | L.L. Liu, J.L. Han & L.S.<br>Sun | OK167494 | OK168531 | – | – |
| 85 | 0–20 cm  | 20200814-1-(1)_0–20<br>cm_A_R2_SC2 | CSF21174 | <i>C. hongkongensis</i> | AA-- | L.L. Liu, J.L. Han & L.S.<br>Sun | OK167495 | OK168532 | – | – |
| 85 | 0–20 cm  | 20200814-1-(1)_0–20<br>cm_A_R2_SC3 | CSF21175 | <i>C. hongkongensis</i> | AA-- | L.L. Liu, J.L. Han & L.S.<br>Sun | OK167496 | OK168533 | – | – |
| 85 | 0–20 cm  | 20200814-1-(1)_0–20<br>cm_A_R2_SC4 | CSF21176 | <i>C. hongkongensis</i> | AA-- | L.L. Liu, J.L. Han & L.S.<br>Sun | OK167497 | OK168534 | – | – |
| 85 | 0–20 cm  | 20200814-1-(1)_0–20<br>cm_B_R1_SC1 | CSF21177 | <i>C. hongkongensis</i> | AA-- | L.L. Liu, J.L. Han & L.S.<br>Sun | OK167498 | OK168535 | – | – |
| 85 | 0–20 cm  | 20200814-1-(1)_0–20<br>cm_B_R1_SC2 | CSF21178 | <i>C. hongkongensis</i> | AA-- | L.L. Liu, J.L. Han & L.S.<br>Sun | OK167499 | OK168536 | – | – |
| 85 | 0–20 cm  | 20200814-1-(1)_0–20<br>cm_B_R2_SC1 | CSF21179 | <i>C. hongkongensis</i> | AA-- | L.L. Liu, J.L. Han & L.S.<br>Sun | OK167500 | OK168537 | – | – |
| 85 | 0–20 cm  | 20200814-1-(1)_0–20<br>cm_B_R2_SC2 | CSF21180 | <i>C. hongkongensis</i> | AA-- | L.L. Liu, J.L. Han & L.S.<br>Sun | OK167501 | OK168538 | – | – |

|    |          |                                    |          |                         |      |                                  |          |          |          |          |
|----|----------|------------------------------------|----------|-------------------------|------|----------------------------------|----------|----------|----------|----------|
| 86 | 0–20 cm  | 20200814-1-(2)_0–20<br>cm_A_R2_SC1 | CSF21181 | <i>C. aconidialis</i>   | AC-- | L.L. Liu, J.L. Han & L.S.<br>Sun | OK167939 | OK168976 | –        | –        |
| 86 | 0–20 cm  | 20200814-1-(2)_0–20<br>cm_A_R2_SC2 | CSF21182 | <i>C. hongkongensis</i> | AA-- | L.L. Liu, J.L. Han & L.S.<br>Sun | OK167502 | OK168539 | –        | –        |
| 86 | 0–20 cm  | 20200814-1-(2)_0–20<br>cm_B_R1_SC1 | CSF21183 | <i>C. hongkongensis</i> | BAAA | L.L. Liu, J.L. Han & L.S.<br>Sun | OK167657 | OK168694 | OK169138 | OK169222 |
| 86 | 0–20 cm  | 20200814-1-(2)_0–20<br>cm_B_R1_SC2 | CSF21184 | <i>C. hongkongensis</i> | BA-- | L.L. Liu, J.L. Han & L.S.<br>Sun | OK167658 | OK168695 | –        | –        |
| 86 | 0–20 cm  | 20200814-1-(2)_0–20<br>cm_B_R2_SC1 | CSF21185 | <i>C. aconidialis</i>   | AA-- | L.L. Liu, J.L. Han & L.S.<br>Sun | OK167831 | OK168868 | –        | –        |
| 86 | 0–20 cm  | 20200814-1-(2)_0–20<br>cm_B_R2_SC2 | CSF21186 | <i>C. aconidialis</i>   | AA-- | L.L. Liu, J.L. Han & L.S.<br>Sun | OK167832 | OK168869 | –        | –        |
| 86 | 20–40 cm | 20200814-1-(2)_0–40<br>cm_A_R1_SC1 | CSF21187 | <i>C. hongkongensis</i> | AA-- | L.L. Liu, J.L. Han & L.S.<br>Sun | OK167503 | OK168540 | –        | –        |
| 86 | 20–40 cm | 20200814-1-(2)_0–40<br>cm_A_R1_SC2 | CSF21188 | <i>C. hongkongensis</i> | AA-- | L.L. Liu, J.L. Han & L.S.<br>Sun | OK167504 | OK168541 | –        | –        |
| 86 | 20–40 cm | 20200814-1-(2)_0–40<br>cm_A_R1_SC3 | CSF21189 | <i>C. hongkongensis</i> | AA-- | L.L. Liu, J.L. Han & L.S.<br>Sun | OK167505 | OK168542 | –        | –        |
| 86 | 20–40 cm | 20200814-1-(2)_0–40<br>cm_A_R1_SC4 | CSF21190 | <i>C. hongkongensis</i> | AA-- | L.L. Liu, J.L. Han & L.S.<br>Sun | OK167506 | OK168543 | –        | –        |
| 86 | 40–60 cm | 20200814-1-(2)_0–60<br>cm_B_R2_SC1 | CSF21191 | <i>C. kyotensis</i>     | ABAA | L.L. Liu, J.L. Han & L.S.<br>Sun | OK167998 | OK169035 | OK169167 | OK169251 |
| 86 | 40–60 cm | 20200814-1-(2)_0–60<br>cm_B_R2_SC2 | CSF21192 | <i>C. kyotensis</i>     | AB-- | L.L. Liu, J.L. Han & L.S.<br>Sun | OK167999 | OK169036 | –        | –        |
| 86 | 40–60 cm | 20200814-1-(2)_0–60<br>cm_B_R2_SC3 | CSF21193 | <i>C. kyotensis</i>     | AB-- | L.L. Liu, J.L. Han & L.S.<br>Sun | OK168000 | OK169037 | –        | –        |
| 86 | 40–60 cm | 20200814-1-(2)_0–60<br>cm_B_R2_SC4 | CSF21194 | <i>C. kyotensis</i>     | AB-- | L.L. Liu, J.L. Han & L.S.<br>Sun | OK168001 | OK169038 | –        | –        |
| 87 | 0–20 cm  | 20200814-1-(3)_0–20<br>cm_A_R1_SC1 | CSF21195 | <i>C. hongkongensis</i> | AA-- | L.L. Liu, J.L. Han & L.S.<br>Sun | OK167507 | OK168544 | –        | –        |
| 87 | 0–20 cm  | 20200814-1-(3)_0–20<br>cm_A_R1_SC2 | CSF21196 | <i>C. hongkongensis</i> | AA-- | L.L. Liu, J.L. Han & L.S.<br>Sun | OK167508 | OK168545 | –        | –        |
| 87 | 0–20 cm  | 20200814-1-(3)_0–20<br>cm_A_R2_SC1 | CSF21197 | <i>C. hongkongensis</i> | AA-- | L.L. Liu, J.L. Han & L.S.<br>Sun | OK167509 | OK168546 | –        | –        |

|    |          |                                    |          |                         |      |                                  |          |          |          |          |
|----|----------|------------------------------------|----------|-------------------------|------|----------------------------------|----------|----------|----------|----------|
| 87 | 0–20 cm  | 20200814-1-(3)_0–20<br>cm_A_R2_SC2 | CSF21198 | <i>C. ilicicola</i>     | BBBA | L.L. Liu, J.L. Han & L.S.<br>Sun | OK168047 | OK169084 | OK169182 | OK169266 |
| 87 | 0–20 cm  | 20200814-1-(3)_0–20<br>cm_B_R1_SC1 | CSF21199 | <i>C. hongkongensis</i> | AA-- | L.L. Liu, J.L. Han & L.S.<br>Sun | OK167510 | OK168547 | –        | –        |
| 87 | 0–20 cm  | 20200814-1-(3)_0–20<br>cm_B_R1_SC2 | CSF21200 | <i>C. hongkongensis</i> | AA-- | L.L. Liu, J.L. Han & L.S.<br>Sun | OK167511 | OK168548 | –        | –        |
| 87 | 0–20 cm  | 20200814-1-(3)_0–20<br>cm_B_R2_SC1 | CSF21201 | <i>C. aconidialis</i>   | AA-- | L.L. Liu, J.L. Han & L.S.<br>Sun | OK167833 | OK168870 | –        | –        |
| 87 | 0–20 cm  | 20200814-1-(3)_0–20<br>cm_B_R2_SC2 | CSF21202 | <i>C. aconidialis</i>   | AA-- | L.L. Liu, J.L. Han & L.S.<br>Sun | OK167834 | OK168871 | –        | –        |
| 88 | 0–20 cm  | 20200815-1-(1)_0–20<br>cm_A_R1_SC1 | CSF21203 | <i>C. hongkongensis</i> | AA-- | L.L. Liu, J.L. Han & L.S.<br>Sun | OK167512 | OK168549 | –        | –        |
| 88 | 0–20 cm  | 20200815-1-(1)_0–20<br>cm_A_R1_SC2 | CSF21204 | <i>C. hongkongensis</i> | AA-- | L.L. Liu, J.L. Han & L.S.<br>Sun | OK167513 | OK168550 | –        | –        |
| 88 | 0–20 cm  | 20200815-1-(1)_0–20<br>cm_A_R2_SC1 | CSF21205 | <i>C. hongkongensis</i> | AA-- | L.L. Liu, J.L. Han & L.S.<br>Sun | OK167514 | OK168551 | –        | –        |
| 88 | 0–20 cm  | 20200815-1-(1)_0–20<br>cm_A_R2_SC2 | CSF21206 | <i>C. hongkongensis</i> | AA-- | L.L. Liu, J.L. Han & L.S.<br>Sun | OK167515 | OK168552 | –        | –        |
| 88 | 0–20 cm  | 20200815-1-(1)_0–20<br>cm_B_R1_SC1 | CSF21207 | <i>C. hongkongensis</i> | AA-- | L.L. Liu, J.L. Han & L.S.<br>Sun | OK167516 | OK168553 | –        | –        |
| 88 | 0–20 cm  | 20200815-1-(1)_0–20<br>cm_B_R1_SC2 | CSF21208 | <i>C. hongkongensis</i> | AA-- | L.L. Liu, J.L. Han & L.S.<br>Sun | OK167517 | OK168554 | –        | –        |
| 88 | 0–20 cm  | 20200815-1-(1)_0–20<br>cm_B_R2_SC1 | CSF21209 | <i>C. hongkongensis</i> | AA-- | L.L. Liu, J.L. Han & L.S.<br>Sun | OK167518 | OK168555 | –        | –        |
| 88 | 0–20 cm  | 20200815-1-(1)_0–20<br>cm_B_R2_SC2 | CSF21210 | <i>C. ilicicola</i>     | BB-- | L.L. Liu, J.L. Han & L.S.<br>Sun | OK168048 | OK169085 | –        | –        |
| 88 | 20–40 cm | 20200815-1-(1)_0–40<br>cm_A_R1_SC1 | CSF21211 | <i>C. hongkongensis</i> | AA-- | L.L. Liu, J.L. Han & L.S.<br>Sun | OK167519 | OK168556 | –        | –        |
| 88 | 20–40 cm | 20200815-1-(1)_0–40<br>cm_A_R1_SC2 | CSF21212 | <i>C. hongkongensis</i> | AA-- | L.L. Liu, J.L. Han & L.S.<br>Sun | OK167520 | OK168557 | –        | –        |
| 88 | 20–40 cm | 20200815-1-(1)_0–40<br>cm_A_R1_SC3 | CSF21213 | <i>C. hongkongensis</i> | AA-- | L.L. Liu, J.L. Han & L.S.<br>Sun | OK167521 | OK168558 | –        | –        |
| 88 | 20–40 cm | 20200815-1-(1)_0–40<br>cm_A_R1_SC4 | CSF21214 | <i>C. hongkongensis</i> | AA-- | L.L. Liu, J.L. Han & L.S.<br>Sun | OK167522 | OK168559 | –        | –        |

|    |           |                                      |          |                         |      |                                  |          |          |          |          |
|----|-----------|--------------------------------------|----------|-------------------------|------|----------------------------------|----------|----------|----------|----------|
| 88 | 60–80 cm  | 20200815-1-(1)_0–80<br>cm_B_R1_SC1   | CSF21215 | <i>C. ilicicola</i>     | BB-- | L.L. Liu, J.L. Han & L.S.<br>Sun | OK168049 | OK169086 | –        | –        |
| 88 | 60–80 cm  | 20200815-1-(1)_0–80<br>cm_B_R1_SC2   | CSF21216 | <i>C. ilicicola</i>     | BB-- | L.L. Liu, J.L. Han & L.S.<br>Sun | OK168050 | OK169087 | –        | –        |
| 88 | 60–80 cm  | 20200815-1-(1)_0–80<br>cm_B_R1_SC3   | CSF21217 | <i>C. ilicicola</i>     | BB-- | L.L. Liu, J.L. Han & L.S.<br>Sun | OK168051 | OK169088 | –        | –        |
| 88 | 60–80 cm  | 20200815-1-(1)_0–80<br>cm_B_R1_SC4   | CSF21218 | <i>C. ilicicola</i>     | BB-- | L.L. Liu, J.L. Han & L.S.<br>Sun | OK168052 | OK169089 | –        | –        |
| 89 | 0–20 cm   | 20200815-1-(2)_0–20<br>cm_A_R2_SC1   | CSF21219 | <i>C. ilicicola</i>     | AAAB | L.L. Liu, J.L. Han & L.S.<br>Sun | OK168014 | OK169051 | OK169174 | OK169258 |
| 89 | 0–20 cm   | 20200815-1-(2)_0–20<br>cm_A_R2_SC2   | CSF21220 | <i>C. ilicicola</i>     | AA-- | L.L. Liu, J.L. Han & L.S.<br>Sun | OK168015 | OK169052 | –        | –        |
| 89 | 0–20 cm   | 20200815-1-(2)_0–20<br>cm_B_R1_SC1   | CSF21221 | <i>C. hongkongensis</i> | AA-- | L.L. Liu, J.L. Han & L.S.<br>Sun | OK167523 | OK168560 | –        | –        |
| 89 | 0–20 cm   | 20200815-1-(2)_0–20<br>cm_B_R1_SC2   | CSF21222 | <i>C. hongkongensis</i> | AA-- | L.L. Liu, J.L. Han & L.S.<br>Sun | OK167524 | OK168561 | –        | –        |
| 89 | 80–100 cm | 20200815-1-(2)_0–<br>100 cm_B_R2_SC1 | CSF21223 | <i>C. aconidialis</i>   | AA-- | L.L. Liu, J.L. Han & L.S.<br>Sun | OK167835 | OK168872 | –        | –        |
| 89 | 80–100 cm | 20200815-1-(2)_0–<br>100 cm_B_R2_SC2 | CSF21224 | <i>C. aconidialis</i>   | AA-- | L.L. Liu, J.L. Han & L.S.<br>Sun | OK167836 | OK168873 | –        | –        |
| 89 | 80–100 cm | 20200815-1-(2)_0–<br>100 cm_B_R2_SC3 | CSF21225 | <i>C. aconidialis</i>   | AA-- | L.L. Liu, J.L. Han & L.S.<br>Sun | OK167837 | OK168874 | –        | –        |
| 89 | 80–100 cm | 20200815-1-(2)_0–<br>100 cm_B_R2_SC4 | CSF21226 | <i>C. aconidialis</i>   | AA-- | L.L. Liu, J.L. Han & L.S.<br>Sun | OK167838 | OK168875 | –        | –        |
| 90 | 0–20 cm   | 20200815-1-(3)_0–20<br>cm_A_R1_SC1   | CSF21227 | <i>C. hongkongensis</i> | AA-- | L.L. Liu, J.L. Han & L.S.<br>Sun | OK167525 | OK168562 | –        | –        |
| 90 | 0–20 cm   | 20200815-1-(3)_0–20<br>cm_A_R1_SC2   | CSF21228 | <i>C. hongkongensis</i> | AA-- | L.L. Liu, J.L. Han & L.S.<br>Sun | OK167526 | OK168563 | –        | –        |
| 90 | 0–20 cm   | 20200815-1-(3)_0–20<br>cm_A_R2_SC1   | CSF21229 | <i>C. hongkongensis</i> | AA-- | L.L. Liu, J.L. Han & L.S.<br>Sun | OK167527 | OK168564 | –        | –        |
| 90 | 0–20 cm   | 20200815-1-(3)_0–20<br>cm_A_R2_SC2   | CSF21230 | <i>C. hongkongensis</i> | AA-- | L.L. Liu, J.L. Han & L.S.<br>Sun | OK167528 | OK168565 | –        | –        |
| 90 | 0–20 cm   | 20200815-1-(3)_0–20<br>cm_B_R1_SC1   | CSF21231 | <i>C. hongkongensis</i> | AA-- | L.L. Liu, J.L. Han & L.S.<br>Sun | OK167529 | OK168566 | –        | –        |

|    |          |                                    |          |                         |      |                                  |          |          |          |          |
|----|----------|------------------------------------|----------|-------------------------|------|----------------------------------|----------|----------|----------|----------|
| 90 | 0–20 cm  | 20200815-1-(3)_0–20<br>cm_B_R2_SC2 | CSF21233 | <i>C. hongkongensis</i> | AFAA | L.L. Liu, J.L. Han & L.S.<br>Sun | OK167629 | OK168666 | OK169127 | OK169211 |
| 90 | 20–40 cm | 20200815-1-(3)_0–40<br>cm_A_R1_SC1 | CSF21234 | <i>C. hongkongensis</i> | AA-- | L.L. Liu, J.L. Han & L.S.<br>Sun | OK167530 | OK168567 | –        | –        |
| 90 | 20–40 cm | 20200815-1-(3)_0–40<br>cm_A_R1_SC2 | CSF21235 | <i>C. hongkongensis</i> | AA-- | L.L. Liu, J.L. Han & L.S.<br>Sun | OK167531 | OK168568 | –        | –        |
| 90 | 20–40 cm | 20200815-1-(3)_0–40<br>cm_A_R1_SC3 | CSF21236 | <i>C. hongkongensis</i> | AA-- | L.L. Liu, J.L. Han & L.S.<br>Sun | OK167532 | OK168569 | –        | –        |
| 90 | 20–40 cm | 20200815-1-(3)_0–40<br>cm_A_R1_SC4 | CSF21237 | <i>C. hongkongensis</i> | AA-- | L.L. Liu, J.L. Han & L.S.<br>Sun | OK167533 | OK168570 | –        | –        |
| 90 | 20–40 cm | 20200815-1-(3)_0–40<br>cm_A_R2_SC1 | CSF21238 | <i>C. hongkongensis</i> | AA-- | L.L. Liu, J.L. Han & L.S.<br>Sun | OK167534 | OK168571 | –        | –        |
| 90 | 20–40 cm | 20200815-1-(3)_0–40<br>cm_A_R2_SC2 | CSF21239 | <i>C. hongkongensis</i> | AA-- | L.L. Liu, J.L. Han & L.S.<br>Sun | OK167535 | OK168572 | –        | –        |
| 90 | 20–40 cm | 20200815-1-(3)_0–40<br>cm_A_R2_SC3 | CSF21240 | <i>C. hongkongensis</i> | AA-- | L.L. Liu, J.L. Han & L.S.<br>Sun | OK167536 | OK168573 | –        | –        |
| 90 | 20–40 cm | 20200815-1-(3)_0–40<br>cm_A_R2_SC4 | CSF21241 | <i>C. aconidialis</i>   | AC-- | L.L. Liu, J.L. Han & L.S.<br>Sun | OK167940 | OK168977 | –        | –        |
| 90 | 20–40 cm | 20200815-1-(3)_0–40<br>cm_B_R2_SC1 | CSF21242 | <i>C. hongkongensis</i> | AA-- | L.L. Liu, J.L. Han & L.S.<br>Sun | OK167537 | OK168574 | –        | –        |
| 90 | 20–40 cm | 20200815-1-(3)_0–40<br>cm_B_R2_SC2 | CSF21243 | <i>C. hongkongensis</i> | AA-- | L.L. Liu, J.L. Han & L.S.<br>Sun | OK167538 | OK168575 | –        | –        |
| 90 | 20–40 cm | 20200815-1-(3)_0–40<br>cm_B_R2_SC4 | CSF21245 | <i>C. hongkongensis</i> | AA-- | L.L. Liu, J.L. Han & L.S.<br>Sun | OK167539 | OK168576 | –        | –        |
| 91 | 0–20 cm  | 20200815-1-(4)_0–20<br>cm_A_R2_SC1 | CSF21246 | <i>C. aconidialis</i>   | AA-- | L.L. Liu, J.L. Han & L.S.<br>Sun | OK167839 | OK168876 | –        | –        |
| 91 | 0–20 cm  | 20200815-1-(4)_0–20<br>cm_A_R2_SC2 | CSF21247 | <i>C. aconidialis</i>   | AA-- | L.L. Liu, J.L. Han & L.S.<br>Sun | OK167840 | OK168877 | –        | –        |
| 91 | 0–20 cm  | 20200815-1-(4)_0–20<br>cm_B_R1_SC1 | CSF21248 | <i>C. hongkongensis</i> | AA-- | L.L. Liu, J.L. Han & L.S.<br>Sun | OK167540 | OK168577 | –        | –        |
| 91 | 0–20 cm  | 20200815-1-(4)_0–20<br>cm_B_R1_SC2 | CSF21249 | <i>C. hongkongensis</i> | AA-- | L.L. Liu, J.L. Han & L.S.<br>Sun | OK167541 | OK168578 | –        | –        |
| 91 | 0–20 cm  | 20200815-1-(4)_0–20<br>cm_B_R2_SC1 | CSF21250 | <i>C. hongkongensis</i> | AA-- | L.L. Liu, J.L. Han & L.S.<br>Sun | OK167542 | OK168579 | –        | –        |

|    |          |                                    |          |                         |      |                                  |          |          |          |          |
|----|----------|------------------------------------|----------|-------------------------|------|----------------------------------|----------|----------|----------|----------|
| 92 | 0–20 cm  | 20200815-1-(5)_0–20<br>cm_A_R1_SC1 | CSF21252 | <i>C. hongkongensis</i> | DA-- | L.L. Liu, J.L. Han & L.S.<br>Sun | OK167696 | OK168733 | –        | –        |
| 92 | 0–20 cm  | 20200815-1-(5)_0–20<br>cm_A_R1_SC2 | CSF21253 | <i>C. hongkongensis</i> | DA-- | L.L. Liu, J.L. Han & L.S.<br>Sun | OK167697 | OK168734 | –        | –        |
| 92 | 0–20 cm  | 20200815-1-(5)_0–20<br>cm_A_R2_SC1 | CSF21254 | <i>C. aconidialis</i>   | AA-- | L.L. Liu, J.L. Han & L.S.<br>Sun | OK167841 | OK168878 | –        | –        |
| 92 | 0–20 cm  | 20200815-1-(5)_0–20<br>cm_A_R2_SC2 | CSF21255 | <i>C. aconidialis</i>   | AA-- | L.L. Liu, J.L. Han & L.S.<br>Sun | OK167842 | OK168879 | –        | –        |
| 92 | 0–20 cm  | 20200815-1-(5)_0–20<br>cm_B_R1_SC1 | CSF21256 | <i>C. aconidialis</i>   | AC-- | L.L. Liu, J.L. Han & L.S.<br>Sun | OK167941 | OK168978 | –        | –        |
| 92 | 0–20 cm  | 20200815-1-(5)_0–20<br>cm_B_R1_SC2 | CSF21257 | <i>C. hongkongensis</i> | DA-- | L.L. Liu, J.L. Han & L.S.<br>Sun | OK167698 | OK168735 | –        | –        |
| 92 | 0–20 cm  | 20200815-1-(5)_0–20<br>cm_B_R2_SC1 | CSF21258 | <i>C. hongkongensis</i> | AA-- | L.L. Liu, J.L. Han & L.S.<br>Sun | OK167543 | OK168580 | –        | –        |
| 92 | 0–20 cm  | 20200815-1-(5)_0–20<br>cm_B_R2_SC2 | CSF21259 | <i>C. hongkongensis</i> | AA-- | L.L. Liu, J.L. Han & L.S.<br>Sun | OK167544 | OK168581 | –        | –        |
| 93 | 0–20 cm  | 20200816-1-(1)_0–20<br>cm_B_R1_SC1 | CSF21260 | <i>C. aconidialis</i>   | AA-- | L.L. Liu, J.L. Han & L.S.<br>Sun | OK167843 | OK168880 | –        | –        |
| 93 | 0–20 cm  | 20200816-1-(1)_0–20<br>cm_B_R1_SC2 | CSF21261 | <i>C. aconidialis</i>   | AA-- | L.L. Liu, J.L. Han & L.S.<br>Sun | OK167844 | OK168881 | –        | –        |
| 93 | 20–40 cm | 20200816-1-(1)_0–40<br>cm_B_R1_SC1 | CSF21262 | <i>C. aconidialis</i>   | ABBA | L.L. Liu, J.L. Han & L.S.<br>Sun | OK167857 | OK168894 | OK169153 | OK169237 |
| 93 | 20–40 cm | 20200816-1-(1)_0–40<br>cm_B_R1_SC2 | CSF21263 | <i>C. aconidialis</i>   | AB-- | L.L. Liu, J.L. Han & L.S.<br>Sun | OK167858 | OK168895 | –        | –        |
| 93 | 20–40 cm | 20200816-1-(1)_0–40<br>cm_B_R1_SC3 | CSF21264 | <i>C. aconidialis</i>   | AB-- | L.L. Liu, J.L. Han & L.S.<br>Sun | OK167859 | OK168896 | –        | –        |
| 93 | 20–40 cm | 20200816-1-(1)_0–40<br>cm_B_R1_SC4 | CSF21265 | <i>C. aconidialis</i>   | AB-- | L.L. Liu, J.L. Han & L.S.<br>Sun | OK167860 | OK168897 | –        | –        |
| 93 | 20–40 cm | 20200816-1-(1)_0–40<br>cm_B_R2_SC2 | CSF21266 | <i>C. aconidialis</i>   | ABBA | L.L. Liu, J.L. Han & L.S.<br>Sun | OK167861 | OK168898 | OK169154 | OK169238 |
| 93 | 20–40 cm | 20200816-1-(1)_0–40<br>cm_B_R2_SC3 | CSF21267 | <i>C. aconidialis</i>   | AB-- | L.L. Liu, J.L. Han & L.S.<br>Sun | OK167862 | OK168899 | –        | –        |
| 93 | 20–40 cm | 20200816-1-(1)_0–40<br>cm_B_R2_SC4 | CSF21268 | <i>C. aconidialis</i>   | AB-- | L.L. Liu, J.L. Han & L.S.<br>Sun | OK167863 | OK168900 | –        | –        |



|    |          |                                    |          |                         |      |                                  |          |          |   |   |
|----|----------|------------------------------------|----------|-------------------------|------|----------------------------------|----------|----------|---|---|
| 93 | 60–80 cm | 20200816-1-(1)_0–80<br>cm_A_R1_SC1 | CSF21269 | <i>C. aconidialis</i>   | AA-- | L.L. Liu, J.L. Han & L.S.<br>Sun | OK167845 | OK168882 | – | – |
| 93 | 60–80 cm | 20200816-1-(1)_0–80<br>cm_A_R1_SC2 | CSF21270 | <i>C. aconidialis</i>   | AA-- | L.L. Liu, J.L. Han & L.S.<br>Sun | OK167846 | OK168883 | – | – |
| 93 | 60–80 cm | 20200816-1-(1)_0–80<br>cm_A_R1_SC3 | CSF21271 | <i>C. aconidialis</i>   | AA-- | L.L. Liu, J.L. Han & L.S.<br>Sun | OK167847 | OK168884 | – | – |
| 93 | 60–80 cm | 20200816-1-(1)_0–80<br>cm_A_R1_SC4 | CSF21272 | <i>C. aconidialis</i>   | AA-- | L.L. Liu, J.L. Han & L.S.<br>Sun | OK167848 | OK168885 | – | – |
| 94 | 0–20 cm  | 20200816-1-(2)_0–20<br>cm_A_R1_SC1 | CSF21276 | <i>C. hongkongensis</i> | AA-- | L.L. Liu, J.L. Han & L.S.<br>Sun | OK167545 | OK168582 | – | – |
| 94 | 0–20 cm  | 20200816-1-(2)_0–20<br>cm_A_R1_SC2 | CSF21277 | <i>C. hongkongensis</i> | AA-- | L.L. Liu, J.L. Han & L.S.<br>Sun | OK167546 | OK168583 | – | – |
| 94 | 0–20 cm  | 20200816-1-(2)_0–20<br>cm_A_R2_SC1 | CSF21278 | <i>C. hongkongensis</i> | AA-- | L.L. Liu, J.L. Han & L.S.<br>Sun | OK167547 | OK168584 | – | – |
| 94 | 0–20 cm  | 20200816-1-(2)_0–20<br>cm_A_R2_SC2 | CSF21279 | <i>C. hongkongensis</i> | AA-- | L.L. Liu, J.L. Han & L.S.<br>Sun | OK167548 | OK168585 | – | – |
| 94 | 0–20 cm  | 20200816-1-(2)_0–20<br>cm_B_R1_SC1 | CSF21280 | <i>C. hongkongensis</i> | AA-- | L.L. Liu, J.L. Han & L.S.<br>Sun | OK167549 | OK168586 | – | – |
| 94 | 0–20 cm  | 20200816-1-(2)_0–20<br>cm_B_R1_SC2 | CSF21281 | <i>C. hongkongensis</i> | AA-- | L.L. Liu, J.L. Han & L.S.<br>Sun | OK167550 | OK168587 | – | – |
| 94 | 0–20 cm  | 20200816-1-(2)_0–20<br>cm_B_R2_SC1 | CSF21282 | <i>C. hongkongensis</i> | AA-- | L.L. Liu, J.L. Han & L.S.<br>Sun | OK167551 | OK168588 | – | – |
| 94 | 0–20 cm  | 20200816-1-(2)_0–20<br>cm_B_R2_SC2 | CSF21283 | <i>C. hongkongensis</i> | AA-- | L.L. Liu, J.L. Han & L.S.<br>Sun | OK167552 | OK168589 | – | – |
| 94 | 20–40 cm | 20200816-1-(2)_0–40<br>cm_A_R1_SC1 | CSF21284 | <i>C. hongkongensis</i> | AA-- | L.L. Liu, J.L. Han & L.S.<br>Sun | OK167553 | OK168590 | – | – |
| 94 | 20–40 cm | 20200816-1-(2)_0–40<br>cm_A_R1_SC2 | CSF21285 | <i>C. hongkongensis</i> | AA-- | L.L. Liu, J.L. Han & L.S.<br>Sun | OK167554 | OK168591 | – | – |
| 94 | 20–40 cm | 20200816-1-(2)_0–40<br>cm_A_R1_SC3 | CSF21286 | <i>C. hongkongensis</i> | AA-- | L.L. Liu, J.L. Han & L.S.<br>Sun | OK167555 | OK168592 | – | – |
| 94 | 20–40 cm | 20200816-1-(2)_0–40<br>cm_A_R1_SC4 | CSF21287 | <i>C. hongkongensis</i> | AA-- | L.L. Liu, J.L. Han & L.S.<br>Sun | OK167556 | OK168593 | – | – |
| 94 | 20–40 cm | 20200816-1-(2)_0–40<br>cm_A_R2_SC1 | CSF21288 | <i>C. hongkongensis</i> | AA-- | L.L. Liu, J.L. Han & L.S.<br>Sun | OK167557 | OK168594 | – | – |

|    |          |                                    |          |                         |      |                                  |          |          |          |          |
|----|----------|------------------------------------|----------|-------------------------|------|----------------------------------|----------|----------|----------|----------|
| 94 | 20–40 cm | 20200816-1-(2)_0–40<br>cm_A_R2_SC2 | CSF21289 | <i>C. hongkongensis</i> | AA-- | L.L. Liu, J.L. Han & L.S.<br>Sun | OK167558 | OK168595 | –        | –        |
| 94 | 20–40 cm | 20200816-1-(2)_0–40<br>cm_A_R2_SC3 | CSF21290 | <i>C. hongkongensis</i> | AA-- | L.L. Liu, J.L. Han & L.S.<br>Sun | OK167559 | OK168596 | –        | –        |
| 94 | 20–40 cm | 20200816-1-(2)_0–40<br>cm_A_R2_SC4 | CSF21291 | <i>C. hongkongensis</i> | AA-- | L.L. Liu, J.L. Han & L.S.<br>Sun | OK167560 | OK168597 | –        | –        |
| 95 | 0–20 cm  | 20200816-1-(3)_0–20<br>cm_A_R1_SC1 | CSF21292 | <i>C. ilicicola</i>     | BBBA | L.L. Liu, J.L. Han & L.S.<br>Sun | OK168053 | OK169090 | OK169183 | OK169267 |
| 95 | 0–20 cm  | 20200816-1-(3)_0–20<br>cm_A_R1_SC2 | CSF21293 | <i>C. ilicicola</i>     | BB-- | L.L. Liu, J.L. Han & L.S.<br>Sun | OK168054 | OK169091 | –        | –        |
| 95 | 0–20 cm  | 20200816-1-(3)_0–20<br>cm_A_R2_SC1 | CSF21294 | <i>C. aconidialis</i>   | AC-- | L.L. Liu, J.L. Han & L.S.<br>Sun | OK167942 | OK168979 | –        | –        |
| 95 | 0–20 cm  | 20200816-1-(3)_0–20<br>cm_A_R2_SC2 | CSF21295 | <i>C. aconidialis</i>   | AC-- | L.L. Liu, J.L. Han & L.S.<br>Sun | OK167943 | OK168980 | –        | –        |
| 95 | 0–20 cm  | 20200816-1-(3)_0–20<br>cm_B_R1_SC1 | CSF21296 | <i>C. aconidialis</i>   | AA-- | L.L. Liu, J.L. Han & L.S.<br>Sun | OK167849 | OK168886 | –        | –        |
| 95 | 0–20 cm  | 20200816-1-(3)_0–20<br>cm_B_R1_SC2 | CSF21297 | <i>C. hongkongensis</i> | AA-- | L.L. Liu, J.L. Han & L.S.<br>Sun | OK167561 | OK168598 | –        | –        |
| 95 | 20–40 cm | 20200816-1-(3)_0–40<br>cm_B_R1_SC1 | CSF21298 | <i>C. hongkongensis</i> | AA-- | L.L. Liu, J.L. Han & L.S.<br>Sun | OK167562 | OK168599 | –        | –        |
| 95 | 20–40 cm | 20200816-1-(3)_0–40<br>cm_B_R1_SC2 | CSF21299 | <i>C. hongkongensis</i> | AA-- | L.L. Liu, J.L. Han & L.S.<br>Sun | OK167563 | OK168600 | –        | –        |
| 95 | 20–40 cm | 20200816-1-(3)_0–40<br>cm_B_R1_SC3 | CSF21300 | <i>C. hongkongensis</i> | AA-- | L.L. Liu, J.L. Han & L.S.<br>Sun | OK167564 | OK168601 | –        | –        |
| 95 | 20–40 cm | 20200816-1-(3)_0–40<br>cm_B_R1_SC4 | CSF21301 | <i>C. hongkongensis</i> | AA-- | L.L. Liu, J.L. Han & L.S.<br>Sun | OK167565 | OK168602 | –        | –        |
| 96 | 0–20 cm  | 20200816-1-(4)_0–20<br>cm_A_R1_SC1 | CSF21302 | <i>C. hongkongensis</i> | AA-- | L.L. Liu, J.L. Han & L.S.<br>Sun | OK167566 | OK168603 | –        | –        |
| 96 | 0–20 cm  | 20200816-1-(4)_0–20<br>cm_A_R1_SC2 | CSF21303 | <i>C. hongkongensis</i> | AA-- | L.L. Liu, J.L. Han & L.S.<br>Sun | OK167567 | OK168604 | –        | –        |
| 96 | 0–20 cm  | 20200816-1-(4)_0–20<br>cm_A_R2_SC1 | CSF21304 | <i>C. hongkongensis</i> | ADAA | L.L. Liu, J.L. Han & L.S.<br>Sun | OK167607 | OK168644 | OK169121 | OK169205 |
| 96 | 0–20 cm  | 20200816-1-(4)_0–20<br>cm_A_R2_SC2 | CSF21305 | <i>C. hongkongensis</i> | AA-- | L.L. Liu, J.L. Han & L.S.<br>Sun | OK167568 | OK168605 | –        | –        |

|    |          |                                    |          |                         |      |                                  |          |          |          |          |
|----|----------|------------------------------------|----------|-------------------------|------|----------------------------------|----------|----------|----------|----------|
| 96 | 0–20 cm  | 20200816-1-(4)_0–20<br>cm_B_R1_SC2 | CSF21307 | <i>C. hongkongensis</i> | AA-- | L.L. Liu, J.L. Han & L.S.<br>Sun | OK167569 | OK168606 | –        | –        |
| 96 | 0–20 cm  | 20200816-1-(4)_0–20<br>cm_B_R2_SC1 | CSF21308 | <i>C. hongkongensis</i> | AA-- | L.L. Liu, J.L. Han & L.S.<br>Sun | OK167570 | OK168607 | –        | –        |
| 96 | 0–20 cm  | 20200816-1-(4)_0–20<br>cm_B_R2_SC2 | CSF21309 | <i>C. hongkongensis</i> | BA-- | L.L. Liu, J.L. Han & L.S.<br>Sun | OK167659 | OK168696 | –        | –        |
| 96 | 20–40 cm | 20200816-1-(4)_0–40<br>cm_A_R1_SC1 | CSF21310 | <i>C. ilicicola</i>     | AAAB | L.L. Liu, J.L. Han & L.S.<br>Sun | OK168016 | OK169053 | OK169175 | OK169259 |
| 96 | 20–40 cm | 20200816-1-(4)_0–40<br>cm_A_R1_SC2 | CSF21311 | <i>C. ilicicola</i>     | AA-- | L.L. Liu, J.L. Han & L.S.<br>Sun | OK168017 | OK169054 | –        | –        |
| 96 | 20–40 cm | 20200816-1-(4)_0–40<br>cm_A_R1_SC3 | CSF21312 | <i>C. ilicicola</i>     | AA-- | L.L. Liu, J.L. Han & L.S.<br>Sun | OK168018 | OK169055 | –        | –        |
| 96 | 20–40 cm | 20200816-1-(4)_0–40<br>cm_A_R1_SC4 | CSF21313 | <i>C. ilicicola</i>     | AA-- | L.L. Liu, J.L. Han & L.S.<br>Sun | OK168019 | OK169056 | –        | –        |
| 96 | 20–40 cm | 20200816-1-(4)_0–40<br>cm_A_R2_SC1 | CSF21314 | <i>C. hongkongensis</i> | AA-- | L.L. Liu, J.L. Han & L.S.<br>Sun | OK167571 | OK168608 | –        | –        |
| 96 | 20–40 cm | 20200816-1-(4)_0–40<br>cm_A_R2_SC2 | CSF21315 | <i>C. hongkongensis</i> | AA-- | L.L. Liu, J.L. Han & L.S.<br>Sun | OK167572 | OK168609 | –        | –        |
| 96 | 20–40 cm | 20200816-1-(4)_0–40<br>cm_A_R2_SC3 | CSF21316 | <i>C. hongkongensis</i> | AA-- | L.L. Liu, J.L. Han & L.S.<br>Sun | OK167573 | OK168610 | –        | –        |
| 96 | 20–40 cm | 20200816-1-(4)_0–40<br>cm_A_R2_SC4 | CSF21317 | <i>C. hongkongensis</i> | AA-- | L.L. Liu, J.L. Han & L.S.<br>Sun | OK167574 | OK168611 | –        | –        |
| 96 | 20–40 cm | 20200816-1-(4)_0–40<br>cm_B_R1_SC1 | CSF21318 | <i>C. ilicicola</i>     | AA-- | L.L. Liu, J.L. Han & L.S.<br>Sun | OK168020 | OK169057 | –        | –        |
| 96 | 20–40 cm | 20200816-1-(4)_0–40<br>cm_B_R1_SC2 | CSF21319 | <i>C. ilicicola</i>     | AA-- | L.L. Liu, J.L. Han & L.S.<br>Sun | OK168021 | OK169058 | –        | –        |
| 96 | 20–40 cm | 20200816-1-(4)_0–40<br>cm_B_R1_SC3 | CSF21320 | <i>C. ilicicola</i>     | AA-- | L.L. Liu, J.L. Han & L.S.<br>Sun | OK168022 | OK169059 | –        | –        |
| 96 | 20–40 cm | 20200816-1-(4)_0–40<br>cm_B_R1_SC4 | CSF21321 | <i>C. ilicicola</i>     | AA-- | L.L. Liu, J.L. Han & L.S.<br>Sun | OK168023 | OK169060 | –        | –        |
| 96 | 20–40 cm | 20200816-1-(4)_0–40<br>cm_B_R2_SC1 | CSF21322 | <i>C. aconidialis</i>   | AA-- | L.L. Liu, J.L. Han & L.S.<br>Sun | OK167850 | OK168887 | –        | –        |
| 96 | 20–40 cm | 20200816-1-(4)_0–40<br>cm_B_R2_SC2 | CSF21323 | <i>C. ilicicola</i>     | AA-- | L.L. Liu, J.L. Han & L.S.<br>Sun | OK168024 | OK169061 | –        | –        |

|    |          |                                    |          |                       |      |                                  |          |          |          |          |
|----|----------|------------------------------------|----------|-----------------------|------|----------------------------------|----------|----------|----------|----------|
| 96 | 20–40 cm | 20200816-1-(4)_0–40<br>cm_B_R2_SC3 | CSF21324 | <i>C. ilicicola</i>   | AA-- | L.L. Liu, J.L. Han & L.S.<br>Sun | OK168025 | OK169062 | –        | –        |
| 96 | 20–40 cm | 20200816-1-(4)_0–40<br>cm_B_R2_SC4 | CSF21325 | <i>C. aconidialis</i> | AA-- | L.L. Liu, J.L. Han & L.S.<br>Sun | OK167851 | OK168888 | –        | –        |
| 96 | 40–60 cm | 20200816-1-(4)_0–60<br>cm_B_R1_SC1 | CSF21326 | <i>C. ilicicola</i>   | AA-- | L.L. Liu, J.L. Han & L.S.<br>Sun | OK168026 | OK169063 | –        | –        |
| 96 | 40–60 cm | 20200816-1-(4)_0–60<br>cm_B_R1_SC2 | CSF21327 | <i>C. ilicicola</i>   | AA-- | L.L. Liu, J.L. Han & L.S.<br>Sun | OK168027 | OK169064 | –        | –        |
| 96 | 40–60 cm | 20200816-1-(4)_0–60<br>cm_B_R1_SC3 | CSF21328 | <i>C. ilicicola</i>   | AA-- | L.L. Liu, J.L. Han & L.S.<br>Sun | OK168028 | OK169065 | –        | –        |
| 96 | 40–60 cm | 20200816-1-(4)_0–60<br>cm_B_R1_SC4 | CSF21329 | <i>C. ilicicola</i>   | AA-- | L.L. Liu, J.L. Han & L.S.<br>Sun | OK168029 | OK169066 | –        | –        |
| 96 | 40–60 cm | 20200816-1-(4)_0–60<br>cm_B_R2_SC1 | CSF21330 | <i>C. ilicicola</i>   | AA-- | L.L. Liu, J.L. Han & L.S.<br>Sun | OK168030 | OK169067 | –        | –        |
| 96 | 40–60 cm | 20200816-1-(4)_0–60<br>cm_B_R2_SC2 | CSF21331 | <i>C. ilicicola</i>   | AA-- | L.L. Liu, J.L. Han & L.S.<br>Sun | OK168031 | OK169068 | –        | –        |
| 96 | 40–60 cm | 20200816-1-(4)_0–60<br>cm_B_R2_SC3 | CSF21332 | <i>C. ilicicola</i>   | AA-- | L.L. Liu, J.L. Han & L.S.<br>Sun | OK168032 | OK169069 | –        | –        |
| 96 | 40–60 cm | 20200816-1-(4)_0–60<br>cm_B_R2_SC4 | CSF21333 | <i>C. ilicicola</i>   | AA-- | L.L. Liu, J.L. Han & L.S.<br>Sun | OK168033 | OK169070 | –        | –        |
| 97 | 0–20 cm  | 20200816-1-(5)_0–20<br>cm_A_R1_SC1 | CSF21334 | <i>C. aconidialis</i> | AA-- | L.L. Liu, J.L. Han & L.S.<br>Sun | OK167852 | OK168889 | –        | –        |
| 97 | 0–20 cm  | 20200816-1-(5)_0–20<br>cm_A_R1_SC2 | CSF21335 | <i>C. kyotensis</i>   | BAAA | L.L. Liu, J.L. Han & L.S.<br>Sun | OK168007 | OK169044 | OK169171 | OK169255 |
| 97 | 0–20 cm  | 20200816-1-(5)_0–20<br>cm_A_R2_SC1 | CSF21336 | <i>C. aconidialis</i> | AC-- | L.L. Liu, J.L. Han & L.S.<br>Sun | OK167944 | OK168981 | –        | –        |
| 97 | 0–20 cm  | 20200816-1-(5)_0–20<br>cm_A_R2_SC2 | CSF21337 | <i>C. aconidialis</i> | AA-- | L.L. Liu, J.L. Han & L.S.<br>Sun | OK167853 | OK168890 | –        | –        |
| 97 | 0–20 cm  | 20200816-1-(5)_0–20<br>cm_B_R1_SC1 | CSF21338 | <i>C. aconidialis</i> | AC-- | L.L. Liu, J.L. Han & L.S.<br>Sun | OK167945 | OK168982 | –        | –        |
| 97 | 0–20 cm  | 20200816-1-(5)_0–20<br>cm_B_R1_SC2 | CSF21339 | <i>C. kyotensis</i>   | AA-- | L.L. Liu, J.L. Han & L.S.<br>Sun | OK167979 | OK169016 | –        | –        |
| 97 | 0–20 cm  | 20200816-1-(5)_0–20<br>cm_B_R2_SC1 | CSF21340 | <i>C. aconidialis</i> | AA-- | L.L. Liu, J.L. Han & L.S.<br>Sun | OK167854 | OK168891 | –        | –        |

|    |          |                                    |          |                         |      |                                  |          |          |          |          |
|----|----------|------------------------------------|----------|-------------------------|------|----------------------------------|----------|----------|----------|----------|
| 97 | 0–20 cm  | 20200816-1-(5)_0–20<br>cm_B_R2_SC2 | CSF21341 | <i>C. kyotensis</i>     | AA-- | L.L. Liu, J.L. Han & L.S.<br>Sun | OK167980 | OK169017 | –        | –        |
| 97 | 40–60 cm | 20200816-1-(5)_0–60<br>cm_B_R2_SC1 | CSF21342 | <i>C. hongkongensis</i> | AA-- | L.L. Liu, J.L. Han & L.S.<br>Sun | OK167575 | OK168612 | –        | –        |
| 97 | 40–60 cm | 20200816-1-(5)_0–60<br>cm_B_R2_SC2 | CSF21343 | <i>C. hongkongensis</i> | AA-- | L.L. Liu, J.L. Han & L.S.<br>Sun | OK167576 | OK168613 | –        | –        |
| 97 | 40–60 cm | 20200816-1-(5)_0–60<br>cm_B_R2_SC3 | CSF21344 | <i>C. hongkongensis</i> | AA-- | L.L. Liu, J.L. Han & L.S.<br>Sun | OK167577 | OK168614 | –        | –        |
| 97 | 40–60 cm | 20200816-1-(5)_0–60<br>cm_B_R2_SC4 | CSF21345 | <i>C. hongkongensis</i> | AA-- | L.L. Liu, J.L. Han & L.S.<br>Sun | OK167578 | OK168615 | –        | –        |
| 98 | 0–20 cm  | 20200816-1-(6)_0–20<br>cm_A_R1_SC1 | CSF21346 | <i>C. aconidialis</i>   | ACAA | L.L. Liu, J.L. Han & L.S.<br>Sun | OK167946 | OK168983 | OK169159 | OK169243 |
| 98 | 0–20 cm  | 20200816-1-(6)_0–20<br>cm_A_R1_SC2 | CSF21347 | <i>C. aconidialis</i>   | AC-- | L.L. Liu, J.L. Han & L.S.<br>Sun | OK167947 | OK168984 | –        | –        |
| 98 | 0–20 cm  | 20200816-1-(6)_0–20<br>cm_A_R2_SC1 | CSF21348 | <i>C. aconidialis</i>   | AAAA | L.L. Liu, J.L. Han & L.S.<br>Sun | OK167855 | OK168892 | OK169151 | OK169235 |
| 98 | 0–20 cm  | 20200816-1-(6)_0–20<br>cm_A_R2_SC2 | CSF21349 | <i>C. aconidialis</i>   | ABBA | L.L. Liu, J.L. Han & L.S.<br>Sun | OK167864 | OK168901 | OK169155 | OK169239 |
| 98 | 0–20 cm  | 20200816-1-(6)_0–20<br>cm_B_R1_SC1 | CSF21350 | <i>C. kyotensis</i>     | AAAA | L.L. Liu, J.L. Han & L.S.<br>Sun | OK167981 | OK169018 | OK169163 | OK169247 |
| 98 | 0–20 cm  | 20200816-1-(6)_0–20<br>cm_B_R1_SC2 | CSF21351 | <i>C. kyotensis</i>     | AA-- | L.L. Liu, J.L. Han & L.S.<br>Sun | OK167982 | OK169019 | –        | –        |
| 98 | 0–20 cm  | 20200816-1-(6)_0–20<br>cm_B_R2_SC1 | CSF21352 | <i>C. aconidialis</i>   | AC-- | L.L. Liu, J.L. Han & L.S.<br>Sun | OK167948 | OK168985 | –        | –        |
| 98 | 0–20 cm  | 20200816-1-(6)_0–20<br>cm_B_R2_SC2 | CSF21353 | <i>C. aconidialis</i>   | AC-- | L.L. Liu, J.L. Han & L.S.<br>Sun | OK167949 | OK168986 | –        | –        |
| 98 | 60–80 cm | 20200816-1-(6)_0–80<br>cm_B_R2_SC1 | CSF21354 | <i>C. hongkongensis</i> | AA-- | L.L. Liu, J.L. Han & L.S.<br>Sun | OK167579 | OK168616 | –        | –        |
| 98 | 60–80 cm | 20200816-1-(6)_0–80<br>cm_B_R2_SC2 | CSF21355 | <i>C. hongkongensis</i> | AA-- | L.L. Liu, J.L. Han & L.S.<br>Sun | OK167580 | OK168617 | –        | –        |
| 98 | 60–80 cm | 20200816-1-(6)_0–80<br>cm_B_R2_SC3 | CSF21356 | <i>C. hongkongensis</i> | AA-- | L.L. Liu, J.L. Han & L.S.<br>Sun | OK167581 | OK168618 | –        | –        |
| 98 | 60–80 cm | 20200816-1-(6)_0–80<br>cm_B_R2_SC4 | CSF21357 | <i>C. hongkongensis</i> | AA-- | L.L. Liu, J.L. Han & L.S.<br>Sun | OK167582 | OK168619 | –        | –        |

|     |           |                                      |          |                         |      |                                  |          |          |          |          |
|-----|-----------|--------------------------------------|----------|-------------------------|------|----------------------------------|----------|----------|----------|----------|
| 99  | 0–20 cm   | 20200816-1-(7)_0–20<br>cm_A_R1_SC1   | CSF21358 | <i>C. hongkongensis</i> | AA-- | L.L. Liu, J.L. Han & L.S.<br>Sun | OK167583 | OK168620 | –        | –        |
| 99  | 0–20 cm   | 20200816-1-(7)_0–20<br>cm_A_R2_SC1   | CSF21359 | <i>C. hongkongensis</i> | BAAA | L.L. Liu, J.L. Han & L.S.<br>Sun | OK167660 | OK168697 | OK169139 | OK169223 |
| 99  | 0–20 cm   | 20200816-1-(7)_0–20<br>cm_A_R2_SC2   | CSF21360 | <i>C. hongkongensis</i> | BA-- | L.L. Liu, J.L. Han & L.S.<br>Sun | OK167661 | OK168698 | –        | –        |
| 99  | 0–20 cm   | 20200816-1-(7)_0–20<br>cm_B_R1_SC1   | CSF21361 | <i>C. hongkongensis</i> | BA-- | L.L. Liu, J.L. Han & L.S.<br>Sun | OK167662 | OK168699 | –        | –        |
| 99  | 0–20 cm   | 20200816-1-(7)_0–20<br>cm_B_R1_SC2   | CSF21362 | <i>C. hongkongensis</i> | BA-- | L.L. Liu, J.L. Han & L.S.<br>Sun | OK167663 | OK168700 | –        | –        |
| 99  | 40–60 cm  | 20200816-1-(7)_0–60<br>cm_B_R2_SC1   | CSF21363 | <i>C. hongkongensis</i> | AA-- | L.L. Liu, J.L. Han & L.S.<br>Sun | OK167584 | OK168621 | –        | –        |
| 99  | 40–60 cm  | 20200816-1-(7)_0–60<br>cm_B_R2_SC2   | CSF21364 | <i>C. hongkongensis</i> | AA-- | L.L. Liu, J.L. Han & L.S.<br>Sun | OK167585 | OK168622 | –        | –        |
| 99  | 40–60 cm  | 20200816-1-(7)_0–60<br>cm_B_R2_SC3   | CSF21365 | <i>C. hongkongensis</i> | AA-- | L.L. Liu, J.L. Han & L.S.<br>Sun | OK167586 | OK168623 | –        | –        |
| 99  | 40–60 cm  | 20200816-1-(7)_0–60<br>cm_B_R2_SC4   | CSF21366 | <i>C. hongkongensis</i> | AA-- | L.L. Liu, J.L. Han & L.S.<br>Sun | OK167587 | OK168624 | –        | –        |
| 100 | 0–20 cm   | 20200816-1-(8)_0–20<br>cm_A_R1_SC1   | CSF21367 | <i>C. hongkongensis</i> | DAAA | L.L. Liu, J.L. Han & L.S.<br>Sun | OK167699 | OK168736 | OK169147 | OK169231 |
| 100 | 0–20 cm   | 20200816-1-(8)_0–20<br>cm_A_R1_SC2   | CSF21368 | <i>C. hongkongensis</i> | ACAB | L.L. Liu, J.L. Han & L.S.<br>Sun | OK167599 | OK168636 | OK169116 | OK169200 |
| 100 | 0–20 cm   | 20200816-1-(8)_0–20<br>cm_A_R2_SC2   | CSF21370 | <i>C. hongkongensis</i> | AAAA | L.L. Liu, J.L. Han & L.S.<br>Sun | OK167588 | OK168625 | OK169112 | OK169197 |
| 100 | 0–20 cm   | 20200816-1-(8)_0–20<br>cm_B_R1_SC1   | CSF21371 | <i>C. hongkongensis</i> | AA-- | L.L. Liu, J.L. Han & L.S.<br>Sun | OK167589 | OK168626 | –        | –        |
| 100 | 0–20 cm   | 20200816-1-(8)_0–20<br>cm_B_R1_SC2   | CSF21372 | <i>C. hongkongensis</i> | ACAB | L.L. Liu, J.L. Han & L.S.<br>Sun | OK167600 | OK168637 | OK169117 | OK169201 |
| 100 | 0–20 cm   | 20200816-1-(8)_0–20<br>cm_B_R2_SC1   | CSF21373 | <i>C. hongkongensis</i> | AA-- | L.L. Liu, J.L. Han & L.S.<br>Sun | OK167590 | OK168627 | –        | –        |
| 100 | 0–20 cm   | 20200816-1-(8)_0–20<br>cm_B_R2_SC2   | CSF21374 | <i>C. hongkongensis</i> | AA-- | L.L. Liu, J.L. Han & L.S.<br>Sun | OK167591 | OK168628 | –        | –        |
| 100 | 80–100 cm | 20200816-1-(8)_0–<br>100 cm_A_R1_SC1 | CSF21375 | <i>C. hongkongensis</i> | AA-- | L.L. Liu, J.L. Han & L.S.<br>Sun | OK167592 | OK168629 | –        | –        |

---

|     |           |                                      |          |                         |      |                                  |          |          |   |   |
|-----|-----------|--------------------------------------|----------|-------------------------|------|----------------------------------|----------|----------|---|---|
| 100 | 80–100 cm | 20200816-1-(8)_0–<br>100 cm_A_R1_SC2 | CSF21376 | <i>C. hongkongensis</i> | AA-- | L.L. Liu, J.L. Han & L.S.<br>Sun | OK167593 | OK168630 | – | – |
| 100 | 80–100 cm | 20200816-1-(8)_0–<br>100 cm_A_R1_SC3 | CSF21377 | <i>C. hongkongensis</i> | AA-- | L.L. Liu, J.L. Han & L.S.<br>Sun | OK167594 | OK168631 | – | – |
| 100 | 80–100 cm | 20200816-1-(8)_0–<br>100 cm_A_R1_SC4 | CSF21378 | <i>C. hongkongensis</i> | AA-- | L.L. Liu, J.L. Han & L.S.<br>Sun | OK167595 | OK168632 | – | – |

---

<sup>1</sup>Number of 100 sampling points in this study. <sup>2</sup>Information associated with sample point and isolate, for example, “20200709-1-(1)\_0–20 cm\_A\_R1\_SC1” indicated sample number “20200709-1-(1), soil layer (0–20 cm), sample plastic bag (A), plastic sampling cup (R1), single conidium 1 (SC1). <sup>3</sup>CSF: Culture Collection located at China Eucalypt Research Centre (CERC), Chinese Academy of Forestry, ZhanJiang, GuangDong Province, China. <sup>4</sup>Genotype within each *Calonectria* species, determined by sequences of the *tef1*, *tub2*, *cmdA* and *his3* regions; “-” means not available. <sup>5</sup>*tef1* = translation elongation factor 1-alpha; *tub2* =  $\beta$ -tubulin; *cmdA* = calmodulin; *his3* = histone H3. <sup>6</sup>“-” represents the relative locus was not amplified in the current study.

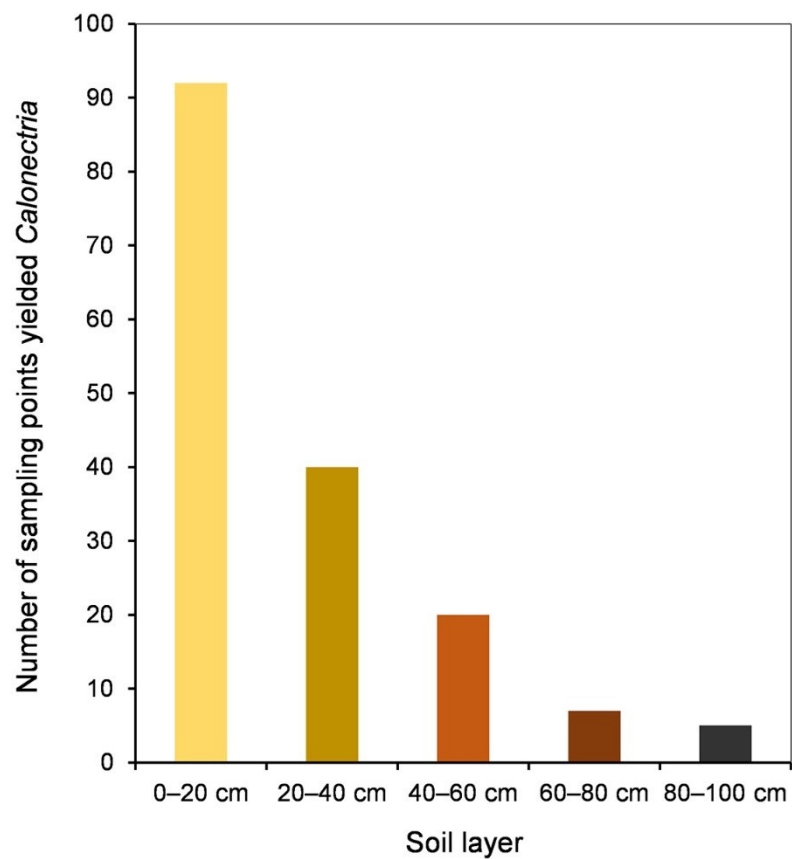

**Figure S1.** Number of sampling points that yielded *Calonectria* in each of five soil layers.



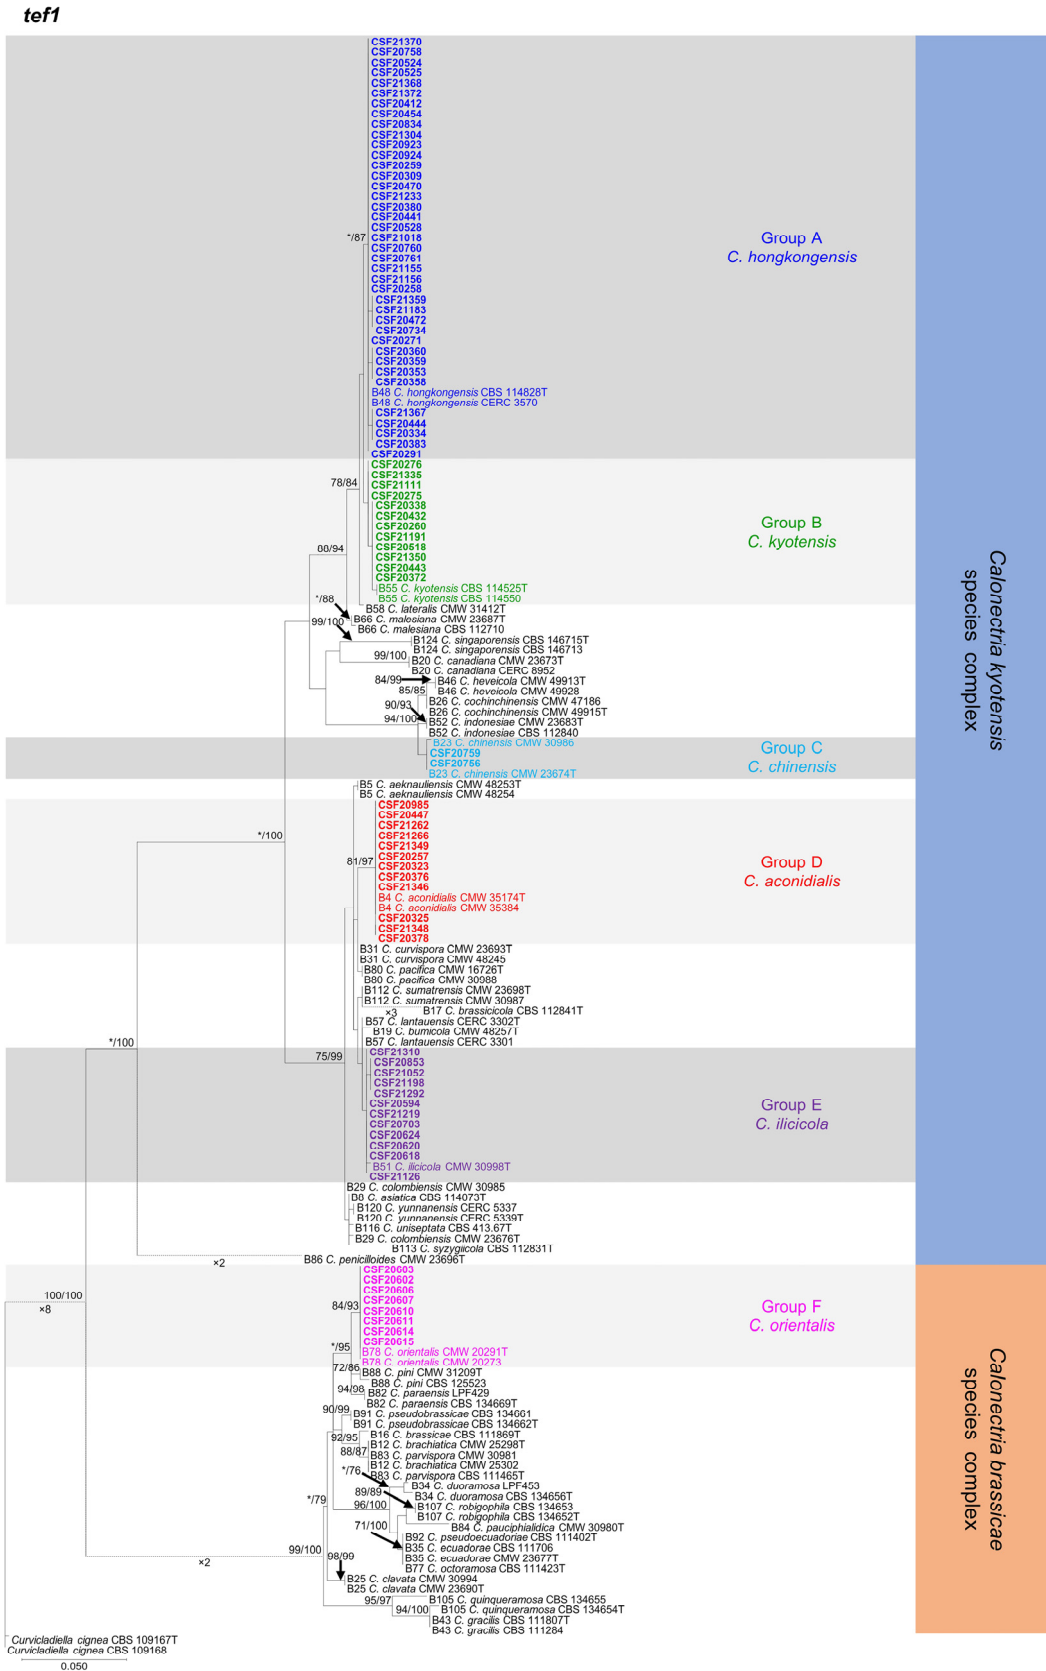

**Figure S2.** Phylogenetic tree of *Calonectria* species based on maximum likelihood (ML) analyses of the dataset of combined *tef1* gene sequences in this study. Bootstrap support values  $\geq 70\%$  are presented above the branches as follows: ML/MP. Bootstrap values  $< 70\%$  or absent are marked with “\*”. Isolates highlighted in six different colors and bold were obtained in this study. Ex-type isolates are marked with “T”. The “B” species codes are consistent with the recently published results in Liu and co-authors [1]. The *Curviciadiella cigna* (CBS 109167 and CBS 109168) was used as outgroup taxon.

tub2

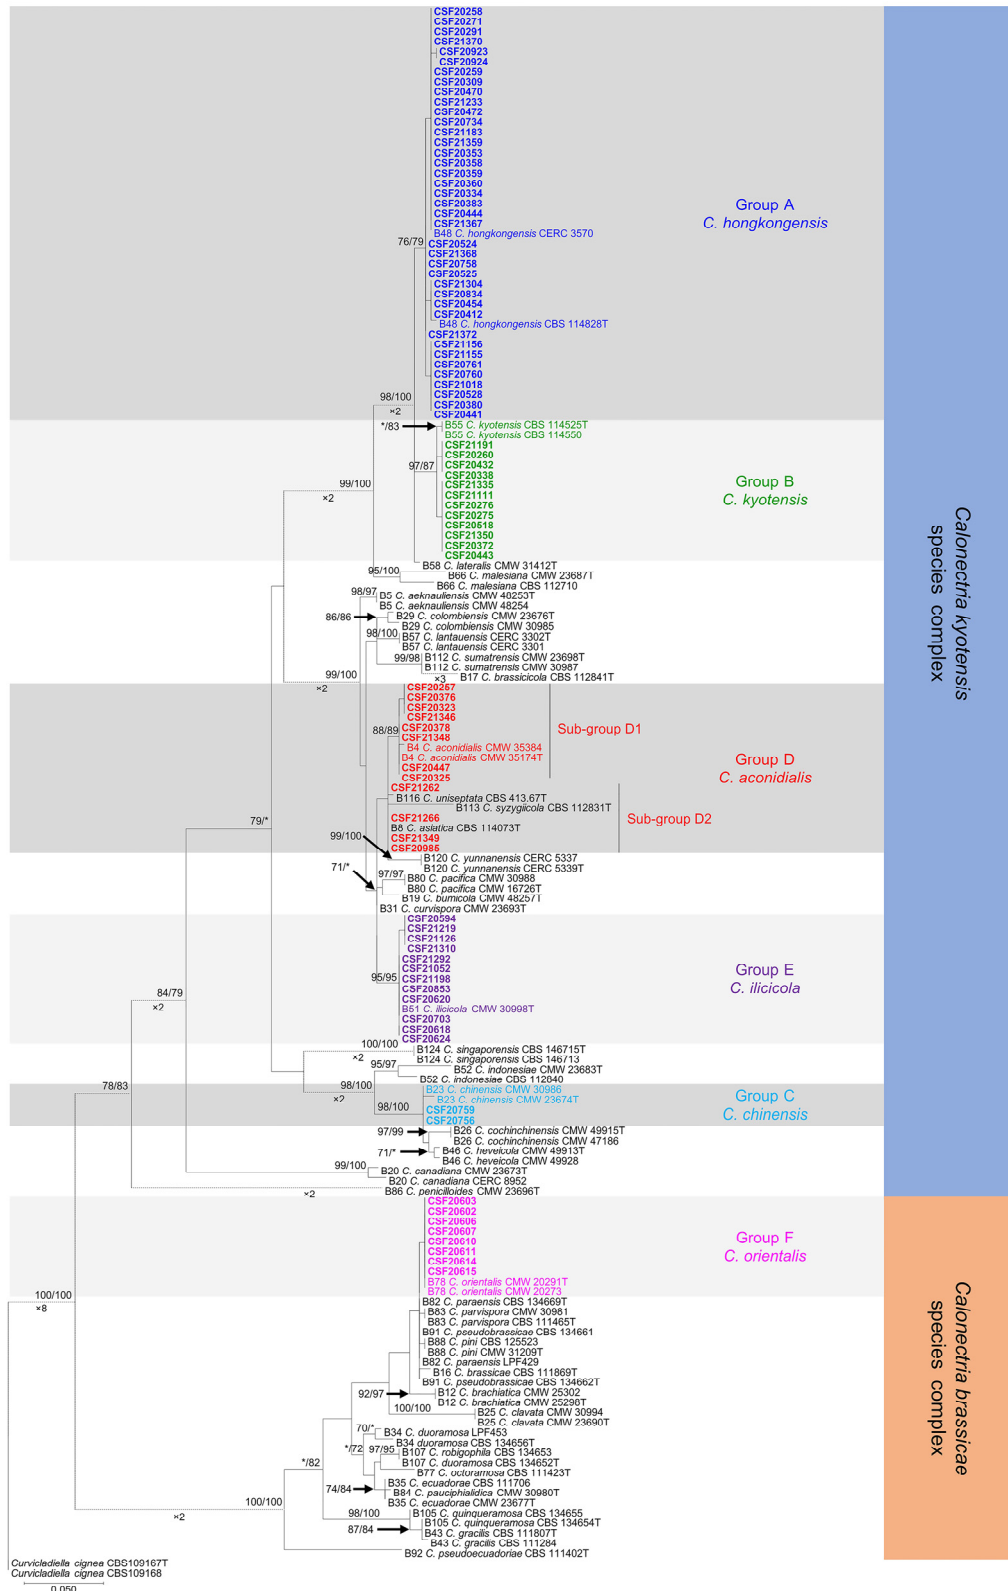

**Figure S3.** Phylogenetic tree of *Calonectria* species based on maximum likelihood (ML) analyses of the dataset of combined *tub2* gene sequences in this study. Bootstrap support values  $\geq 70\%$  are presented above the branches as follows: ML/MP. Bootstrap values  $< 70\%$  or absent are marked with “\*”. Isolates highlighted in six different colors and bold were obtained in this study. Ex-type isolates are marked with “T”. The “B” species codes are consistent with the recently published results in Liu and co-authors [1]. The *Curviciadiella cigneae* (CBS 109167 and CBS 109168) was used as outgroup taxon.

cmdA

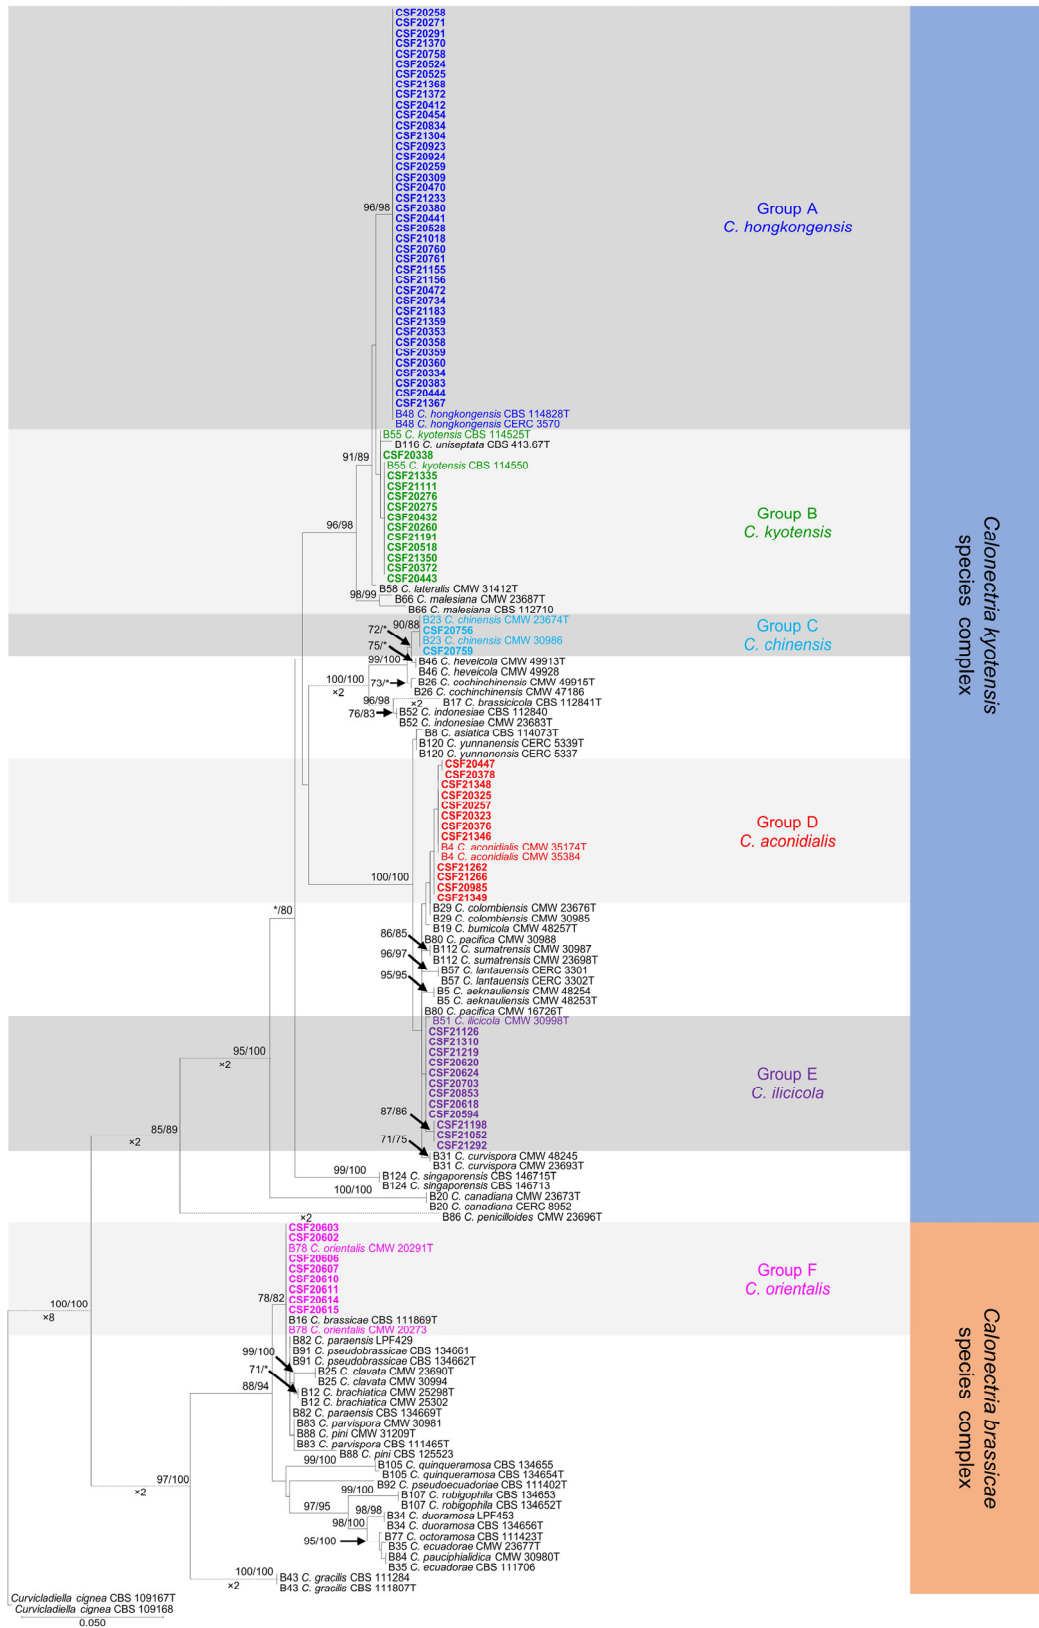

**Figure S4.** Phylogenetic tree of *Calonectria* species based on maximum likelihood (ML) analyses of the dataset of combined *cmdA* gene sequences in this study. Bootstrap support values  $\geq 70\%$  are presented above the branches as follows: ML/MP. Bootstrap values  $< 70\%$  or absent are marked with “\*”. Isolates highlighted in six different colors and bold were obtained in this study. Ex-type isolates are marked with “T”. The “B” species codes are consistent with the recently published results in Liu and co-authors [1]. The *Curviciadiella cigneae* (CBS 109167 and CBS 109168) was used as outgroup taxon.

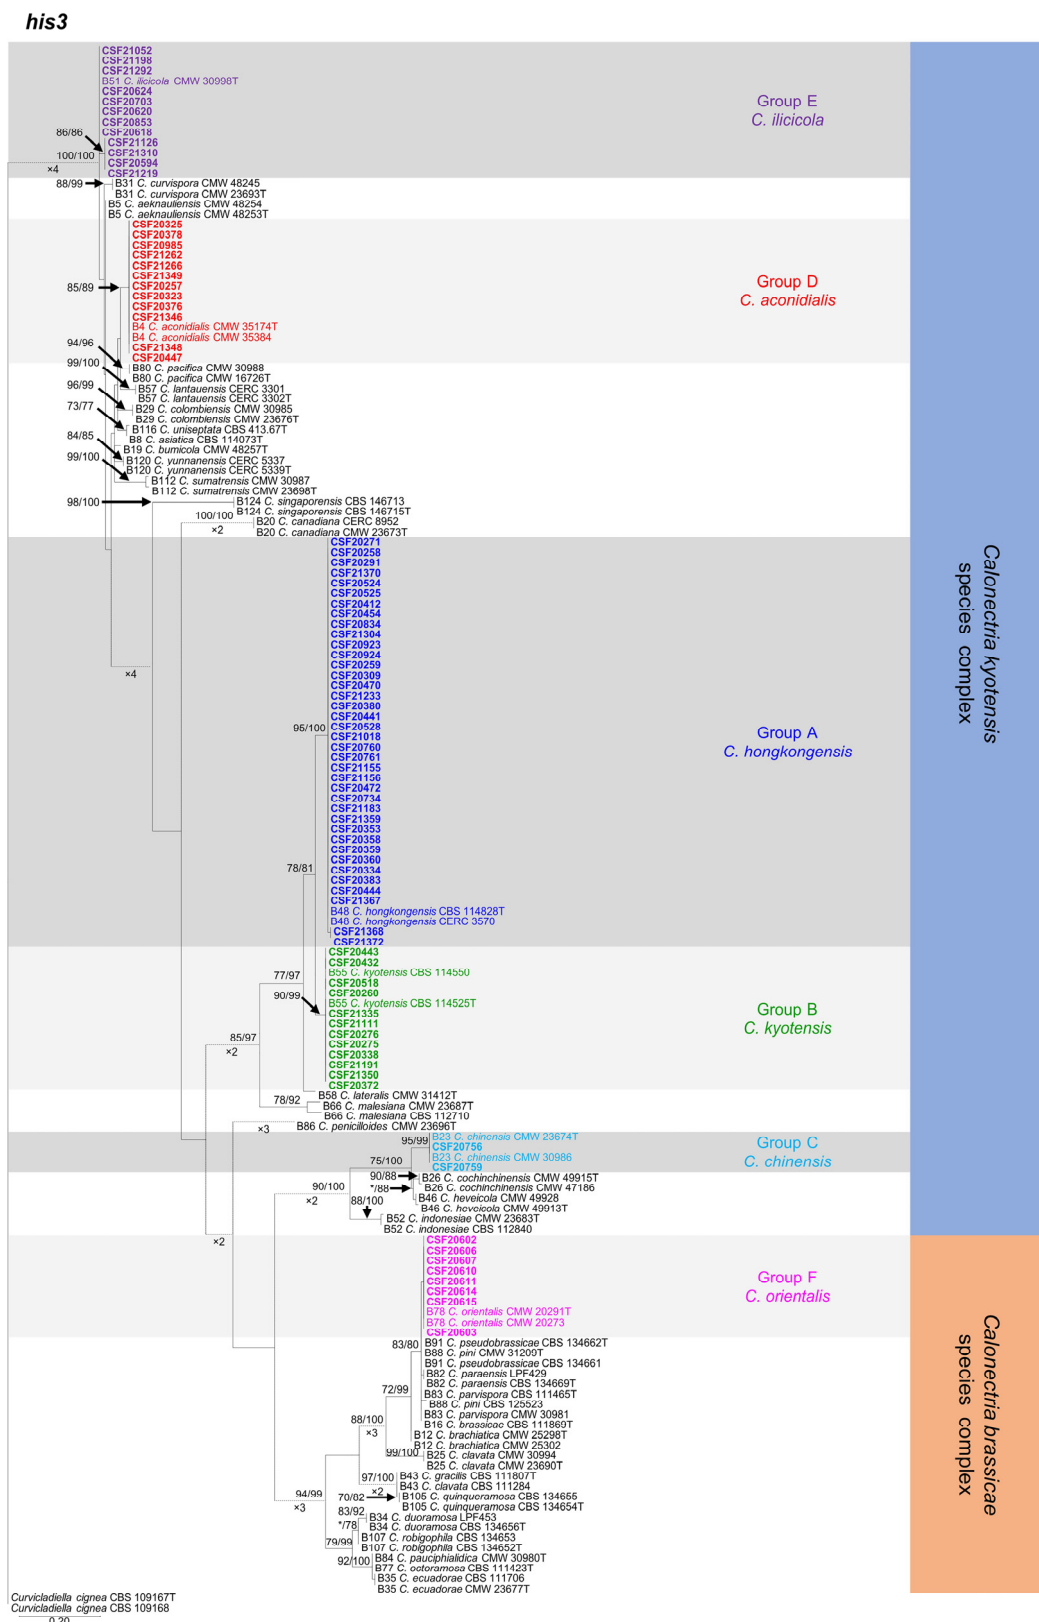

**Figure S5.** Phylogenetic tree of *Calonectria* species based on maximum likelihood (ML) analyses of the dataset of combined *his3* gene sequences in this study. Bootstrap support values  $\geq 70\%$  are presented above the branches as follows: ML/MP. Bootstrap values  $< 70\%$  or absent are marked with “\*”. Isolates highlighted in six different colors and bold were obtained in this study. Ex-type isolates are marked with “T”. The “B” species codes are consistent with the recently published results in Liu and co-authors [1]. The *Curviciadiella cigna* (CBS 109167 and CBS 109168) was used as outgroup taxon.

## References

- 
1. Liu, Q.L.; Li, J.Q.; Wingfield, M.J.; Duong, T.A.; Wingfield, B.D.; Crous, P.W.; Chen, S.F. Reconsideration of species boundaries and proposed DNA barcodes for *Calonectria*. *Stud. Mycol.* **2020**, *97*, 100106, doi:10.1016/j.simyco.2020.08.001.
